# Supplementary material for: Gene-selective transcription promotes the inhibition of tissue reparative macrophages by TNF
Source: Life Sci Alliance. 2022 Jan 13;5(4):e202101315. doi: 10.26508/lsa.202101315 (PMC8761491; doi:10.26508/lsa.202101315)
Supplement: Supplementary file 1 [file LSA-2021-01315_TableS1.xlsx]

## Sheet: Supplementary Data
Gene names	Protein names	Positions within proteins	ANOVA Significant	ANOVA q-value	Mean co_II_0min	Mean IL4_IL13_30min	Mean IL4_IL13_60min	Mean IL4_IL13_120min	Mean IL4_IL13_150min	Mean co_IIT_0min	Mean IL4_IL13_TNF_30min	Mean IL4_IL13_TNF_60min	Mean IL4_IL13_TNF_120min	Mean IL4_IL13_TNF_150min
Dennd4c	DENN domain-containing protein 4C	1796	+	0.018411	-1.2937	-0.90225	0.0802004	-0.702074	-0.118683	-0.696571	1.31705	0.764303	0.974251	0.671553
Tns1		604	+	0.0092381	-0.95007	-0.865588	-0.789346	-0.255742	-0.341596	-0.651054	1.74597	1.20799	0.737057	0.0997365
Wdfy4		24	+	0.0461503	-0.614902	-0.460933	0.0935114	-0.45342	-0.557272	-0.761686	2.34035	0.791513	0.224667	-0.247916
Ahnak		893	+	0.0235876	-1.61208	-0.655184	-0.401909	-0.430959	-0.171642	-0.202713	1.35431	0.962276	0.807076	0.382217
Ahnak		178	+	0.004	-0.849417	-0.805502	-0.509063	-0.520115	-0.343934	-0.752488	2.38882	0.664867	0.542693	0.366717
Utrn		3295	+	0.0269244	-0.657168	-0.714446	-1.13459	-0.690927	-0.195326	-0.613486	0.990488	0.677082	0.719085	1.35582
Kidins220		1578	+	0.0415094	-0.892911	-0.630762	-0.12556	-0.648894	-0.777154	-0.996923	0.836073	1.00849	1.03394	1.01935
Map3k4	Mitogen-activated protein kinase kinase kinase 4	1217	+	0.0336691	-1.18968	-0.597573	-0.128088	-0.516294	-0.198437	-0.926597	0.535736	1.0657	1.03562	0.82253
Nfil3	Nuclear factor interleukin-3-regulated protein	286	+	0.004	-0.857502	-0.958379	-1.05127	0.798587	0.80676	-0.615318	-1.25771	0.347438	1.2341	0.938152
Bhlhe40	Class E basic helix-loop-helix protein 40	383	+	0.0212857	-1.09572	-0.787166	-0.698969	-0.414484	0.72169	-0.348344	-0.306164	-0.120146	1.43647	1.34518
Il16	Pro-interleukin-16;Interleukin-16	930	+	0.0239158	-0.816837	-1.06929	-0.265677	-0.783006	-0.754996	-0.557924	1.44285	1.09377	0.832374	0.716961
Parg	Poly(ADP-ribose) glycohydrolase	297	+	0.0113962	-0.438418	-0.945851	-0.378591	-0.482664	-1.04053	-0.4786	1.91631	1.30693	0.694052	-0.264809
Pak1	Serine/threonine-protein kinase PAK 1	220	+	0.0437605	-0.773736	-0.0642224	-0.576383	-0.0446327	-0.249117	-0.348582	2.16055	1.1094	-0.431391	-0.464174
Pak1	Serine/threonine-protein kinase PAK 1	223	+	0.00266667	-1.0608	-0.528444	-0.641915	-0.731324	-0.28068	-0.710856	1.97277	1.1037	0.656293	0.351696
Tom1	Target of Myb protein 1	160	+	0.0348414	0.385087	-0.432828	-0.783323	-0.402909	-0.0134803	-0.876363	2.32442	0.279293	0.049292	-0.255494
Tspyl1	Testis-specific Y-encoded-like protein 1	2	+	0.0274516	0.333496	-0.949984	0.373297	0.676436	0.626379	0.500232	-0.757708	-1.79703	0.22517	0.592711
Coro1a	Coronin-1A	426	+	0.0143051	-0.643869	-0.540301	-1.27143	-0.679295	-0.766928	-0.307308	1.34212	1.07185	0.929215	0.556805
Slc4a2	Anion exchange protein 2	112	+	0.0239149	-1.07154	-0.560796	-0.390846	-0.733243	-0.681129	-0.578299	1.40147	1.01986	1.05408	0.482612
Jund	Transcription factor jun-D	90	+	0.0364295	0.0157928	0.23634	-0.246561	-0.277663	-0.600093	-0.318268	2.58976	0.266638	-0.646797	-0.524286
Lsp1	Lymphocyte-specific protein 1	63	+	0.0114043	-0.828593	-0.671023	-0.375264	-0.970457	-0.741028	-0.607813	1.58481	1.08646	0.926514	0.545769
Zfp36	Tristetraprolin	178	+	0.04195	-0.77453	-0.828446	-0.546826	-0.805299	-0.206002	-0.728343	0.780933	1.12516	1.11248	0.670786
Marcks	Myristoylated alanine-rich C-kinase substrate	113	+	0.0324148	-0.501443	-0.338244	-0.548737	-0.797474	-0.280519	-0.447038	1.48741	1.2907	0.829765	-0.614442
Csf2rb	Cytokine receptor common subunit beta	778	+	0.0453491	-0.431235	-0.404958	-0.123308	-0.566321	-0.35663	-0.366005	2.53099	0.507197	-0.403147	0.0249394
Map4	Microtubule-associated protein 4	254	+	0.0084	-0.775377	-1.30492	-0.3329	-0.496011	-0.496936	-0.864926	1.28818	1.06933	0.9629	0.739024
Map4	Microtubule-associated protein 4	475	+	0.0345175	-0.842299	-1.00164	-0.485559	-1.07562	-0.201569	-0.335526	1.48561	1.00485	0.969018	0.431932
Map4	Microtubule-associated protein 4	449	+	0.0415443	-0.905032	-0.964977	-0.433001	-0.671058	-0.147323	-0.573522	1.45938	0.602285	0.831395	0.780374
Ptk2	Focal adhesion kinase 1	948	+	0.00419048	-1.44055	-0.694264	-0.322729	-0.399755	-0.198385	-0.970038	1.25872	1.17577	0.908064	0.694006
Ier3	Radiation-inducible immediate-early gene IEX-1	31	+	0.024404	-0.475426	-0.422821	-0.66874	-0.524206	-0.304929	-0.534744	2.54596	0.00351828	0.398968	0.269784
Rad23a	UV excision repair protein RAD23 homolog A	123	+	0.0434356	0.711055	-1.10637	-1.26668	0.388571	-0.442844	0.888269	0.393734	0.999297	-0.606435	-0.564135
Rad23b	UV excision repair protein RAD23 homolog B	160	+	0.0466286	-0.883541	-0.419372	-0.343725	-0.420531	-0.0355657	-0.00305136	2.31042	0.809475	-0.369195	-0.266977
Ybx1;Ybx2;Ybx3	Nuclease-sensitive element-binding protein 1;Y-box-binding protein 2;Y-box-binding protein 3	100;139;126	+	0.0202025	-0.810234	-0.222845	-0.607758	-0.439172	-0.287766	-0.191676	2.2681	0.960385	0.181644	-0.563247
Pkn1	Serine/threonine-protein kinase N1	536	+	0.0482889	-0.586576	-0.98227	-0.635131	-0.248104	-0.595068	-0.776271	1.70629	0.837108	0.682684	0.470791
Stx4	Syntaxin-4	36	+	0.0115652	-0.912292	-0.857717	-0.377846	-0.957885	-0.595259	-0.360877	1.69335	1.01222	0.788253	0.533681
Sh3bp2	SH3 domain-binding protein 2	414	+	0.0198442	-1.02532	-0.403779	-0.359036	-0.566004	-0.60691	-0.94718	1.22864	1.53711	0.84277	0.264434
Hmha1	Minor histocompatibility protein HA-1	875	+	0.0241224	-0.479597	-0.877216	-0.231333	-0.777418	-0.31329	-0.208618	1.94233	1.25886	0.244868	-0.428465
Spg11	Spatacsin	1932	+	0.00884211	-0.841112	-0.56899	-0.469144	-0.586594	-0.213936	0.0153931	2.29767	1.11491	-0.0348571	-0.451939
Rcsd1	CapZ-interacting protein	105	+	0.0335143	-0.873895	-1.09348	-0.0442441	-0.769826	-0.334934	-0.197321	1.91254	0.867779	0.413641	0.229716
Pds5b	Sister chromatid cohesion protein PDS5 homolog B	1182	+	0.0152258	0.486091	0.678817	0.87346	0.602305	0.620573	0.717709	-1.23195	-1.65586	-0.343028	-0.512889
Arhgap1	Rho GTPase-activating protein 1	51	+	0.0154667	-0.962057	-0.808264	-0.395067	-0.679129	-0.460429	-0.669811	1.56404	1.38955	0.642716	0.353519
Sap30l	Histone deacetylase complex subunit SAP30L	98	+	0.0259099	0.171505	0.865254	0.749873	0.732227	0.685823	0.783949	-1.07806	-1.29656	-0.704439	-0.603854
Zzef1	Zinc finger ZZ-type and EF-hand domain-containing protein 1	1488	+	0.0174118	-1.1673	-0.106712	-0.461039	-0.45295	-0.939683	-0.680199	1.27426	1.15665	0.79951	0.519169
Synrg	Synergin gamma	974	+	0.0253084	-0.996977	-0.892002	-0.0799271	-0.890837	-0.248401	-0.713064	1.58225	0.832476	0.854373	0.64259
Acbd5	Acyl-CoA-binding domain-containing protein 5	395	+	0.0428148	-1.29274	-0.959018	-0.347628	-0.145246	-0.0714838	-0.627411	0.251136	1.12023	1.08476	0.705654
Tnfaip3	Tumor necrosis factor alpha-induced protein 3	220	+	0.0115385	-1.28533	-0.116948	-0.796654	-0.518372	-0.689613	-0.607353	1.19887	1.13169	1.11282	0.469814
Ripk1	Receptor-interacting serine/threonine-protein kinase 1	25	+	0.0024	-0.722171	-1.05351	-0.785255	-0.88319	-0.642303	-0.581198	1.09422	0.880155	1.22759	1.11895
Arhgef2	Rho guanine nucleotide exchange factor 2	931	+	0.0152615	-0.902818	-0.913993	-0.282409	-0.621887	-0.655076	-0.753432	1.57768	1.18051	0.85332	0.449654
Slc9a1	Sodium/hydrogen exchanger 1	730	+	0.0197949	-0.305406	-0.605324	-0.151498	-0.109271	-0.0677246	-0.347466	2.75068	-0.464902	7.45095e-05	-0.217625
Trim25	E3 ubiquitin/ISG15 ligase TRIM25	424	+	0.0267438	-0.742718	-1.04621	-0.133878	-0.96154	-0.677678	-0.189951	1.00491	1.24199	1.02561	0.266256
Sos1	Son of sevenless homolog 1	1082	+	0.0257091	-0.87061	-0.763642	-0.866214	-0.769849	-0.186157	-0.493281	1.13717	1.29833	0.948268	0.39627
Supt6h	Transcription elongation factor SPT6	91	+	0.00430769	-0.945556	-0.727765	-0.679049	-1.01459	-0.499883	-0.405354	1.22872	1.23511	0.93162	0.707246
Zyx	Zyxin	336	+	0.0044	-0.932664	-0.695034	-0.372307	-0.73031	-0.365813	-0.576004	2.16641	1.23961	0.44407	0.00535678
Peak1	Pseudopodium-enriched atypical kinase 1	852	+	0.0385359	-0.935721	-0.727672	-0.015799	0.141629	-0.447898	-0.524095	2.40598	0.417132	0.0746986	-0.0845987
Rftn1	Raftlin	241	+	0.00423529	-1.16797	-0.53137	-0.409414	-0.883822	-0.471608	-0.596067	1.6991	1.07164	0.76254	0.598645
Pdcd11	Protein RRP5 homolog	1468	+	0.0307176	-1.10822	-0.815899	-0.473268	-0.0288898	-0.484318	-0.903504	0.37332	1.33725	1.07007	0.68342
Wdr44	WD repeat-containing protein 44	50	+	0.0308923	-1.10029	-0.7595	-0.371932	-0.696803	-0.382579	-0.521839	1.7199	1.11604	0.809509	0.238966
Ankle2	Ankyrin repeat and LEM domain-containing protein 2	820	+	0.0153651	-1.30958	-1.2217	-0.245978	-0.121928	0.238995	-0.217092	2.05114	0.786309	0.56404	-0.318591
Nes	Nestin	1021	+	0.00414286	-0.313601	-0.733562	-0.79926	-0.673023	-0.87902	-1.00498	1.34183	1.19985	0.895863	0.698396
Fkbp15	FK506-binding protein 15	1018	+	0.0114667	-1.03214	-0.785652	-0.408091	-0.922157	-0.539607	-0.412973	1.816	0.740124	0.938735	0.626425
Wdfy3	WD repeat and FYVE domain-containing protein 3	970	+	0.0173143	-0.612745	-0.855742	-0.0188938	-0.746933	-0.268702	-0.507331	2.29605	1.00096	-0.0592333	0.0607469
Ino80	DNA helicase INO80	470	+	0.00644444	-0.611107	-0.804008	-0.216995	-0.837096	-0.779577	-0.54011	1.51746	1.63022	0.579048	-0.00862221
Acap2	Arf-GAP with coiled-coil, ANK repeat and PH domain-containing protein 2	521	+	0.0385166	-0.714556	-0.981686	-1.03761	-0.152966	-0.106859	-0.518639	1.60873	0.728241	1.13149	-0.0854988
Twistnb	DNA-directed RNA polymerase I subunit RPA43	318	+	0.0131636	-1.05113	-0.34212	-0.744024	-0.319047	-0.179074	-1.15103	0.8499	1.36757	0.96422	0.500907
Mycbp2	Probable E3 ubiquitin-protein ligase MYCBP2	1583	+	0.02416	-0.603245	-0.710784	-0.529323	-0.660644	-0.229244	-0.906569	2.07451	1.01653	0.487279	0.212777
Atxn2l	Ataxin-2-like protein	597	+	0.0366667	-0.964469	-0.747704	-0.663255	-0.614556	-0.573153	-0.376272	1.76001	1.23703	0.681147	0.205199
Ppp6r1	Serine/threonine-protein phosphatase 6 regulatory subunit 1	530	+	0.0386842	0.653021	-0.560499	-0.642502	0.783042	-0.528236	-0.367648	2.01699	-0.363621	-0.410404	-0.508702
Cyld	Ubiquitin carboxyl-terminal hydrolase CYLD	341	+	0.0463953	-0.819519	-0.447332	-0.457448	-0.628023	0.0289697	0.0686963	2.11251	0.68946	0.474436	-0.712574
Ece2	Endothelin-converting enzyme 2;Methyltransferase-like region;Endothelin-converting enzyme 2 region	9	+	0.024	-0.507938	-0.676915	-0.722524	-0.736383	-0.513288	-0.029983	2.06966	0.949916	0.623101	-0.41641
Ubap1	Ubiquitin-associated protein 1	146	+	0.00503226	-0.650981	-0.656778	-0.305924	-0.651454	-0.499307	-0.72151	2.42901	0.879712	0.441198	-0.0222182
Snx14	Sorting nexin-14	766	+	0.0256696	-0.310403	-0.36711	-0.484705	-0.273642	-0.418156	-0.582651	2.58344	0.662025	-0.0864444	-0.393984
Psd4	PH and SEC7 domain-containing protein 4	442	+	0.0433171	-0.910526	-0.789619	-0.26707	-0.516525	-0.102298	-0.671232	2.07569	0.974521	0.253139	0.183093
Ppp1r18	Phostensin	224	+	0.00133333	-0.694398	-0.65775	-0.318841	-0.574975	-0.412106	-0.661743	2.80951	0.248274	0.435811	0.181417
Sp110	Sp110 nuclear body protein	177	+	0.0250189	0.379556	0.637029	0.860525	0.816605	0.687889	0.616174	-1.29211	-0.311143	-0.805243	-1.36595
Trim47	Tripartite motif-containing protein 47	591	+	0.00422222	-0.901729	-0.911024	-0.471823	-0.83917	-0.584724	-0.636062	1.43259	1.36207	0.984685	0.431437
Slc39a6	Zinc transporter ZIP6	488	+	0.0432485	-0.931733	-0.499999	-0.573702	-0.636992	-0.205624	-0.750979	1.99352	0.872981	0.499411	0.411665
Dock2	Dedicator of cytokinesis protein 2	1683	+	0.00355556	-0.845096	-0.883234	-0.576867	-0.860015	-0.610569	-0.497657	1.81428	1.29636	0.832284	0.266409
Synj1	Synaptojanin-1	1350	+	0.014069	-1.37924	-0.510612	-0.230335	-0.589451	-0.920564	-0.132304	1.41779	1.08002	0.831114	0.372654
Irf2bpl	Interferon regulatory factor 2-binding protein-like	638	+	0.0199474	-0.160986	-0.303316	0.875873	0.926397	1.00307	1.05634	-1.26214	-0.980701	-0.585254	-0.490908
Dcaf8	DDB1- and CUL4-associated factor 8	100	+	0.0289764	0.500914	0.469777	0.54242	-0.0845434	0.446916	0.374023	0.507838	0.429583	-1.95574	-0.739448
Fam129b	Niban-like protein 1	650	+	0.00413793	-0.659905	-0.508719	-0.065884	-0.214566	-0.477893	-0.560672	2.34633	-0.435376	1.19368	-0.29353
Dync1li1	Cytoplasmic dynein 1 light intermediate chain 1	516	+	0.00346667	-0.80718	-0.791745	-0.300136	-0.622925	-0.656831	-0.699541	2.22441	1.09298	0.586547	0.0933445
Usp15	Ubiquitin carboxyl-terminal hydrolase 15	229	+	0.0164242	-0.95049	-0.860573	-0.409597	-0.901784	-0.34748	-0.401455	1.75655	1.17531	0.92482	0.0494305
Gpn1	GPN-loop GTPase 1	314	+	0.0324706	-1.12721	-1.01075	-0.56921	-0.689814	-0.0868751	-0.234812	1.48145	1.25371	0.721288	0.215884
Twf1	Twinfilin-1	143	+	0.00819512	-0.440639	-0.580829	-0.398842	-0.717208	-0.0228448	-0.404889	2.15344	1.35322	-0.0824192	-0.57126
Tnip2	TNFAIP3-interacting protein 2	147	+	0.01152	-0.6716	-0.474333	-0.890009	-0.557859	-0.64294	-0.814265	1.31124	1.33429	1.12	0.111464
Errfi1	ERBB receptor feedback inhibitor 1	251	+	0.00266667	-1.00034	-0.876556	-0.599156	-0.179583	0.0872666	-0.943511	-0.659153	0.999743	1.42385	1.23554
Errfi1	ERBB receptor feedback inhibitor 1	325	+	0.023957	-0.835787	-0.787	-0.61739	-0.438261	-0.0937714	-0.334331	-0.847932	0.719572	1.40432	1.24405
Sh3bp5l	SH3 domain-binding protein 5-like	30	+	0.0270508	-0.727421	-0.804022	0.181839	-0.886378	-0.24342	-0.453694	1.48748	1.34188	0.618261	-0.359055
Rtn4	Reticulon-4	344	+	0.0324179	-0.522477	-0.321322	-0.860841	-0.345801	-0.609255	-0.334145	2.14811	1.04722	0.314737	-0.427052
Slc25a46	Solute carrier family 25 member 46	61	+	0.0457076	0.0840733	-0.423498	-0.915694	-0.652491	-0.266927	-0.577085	1.82863	1.11592	0.297482	-0.434783
Ranbp3	Ran-binding protein 3	148	+	0.0266016	-0.516621	-0.509768	-0.0963937	-0.537313	-0.455878	-1.1378	1.64625	1.24376	0.689778	-0.179964
Tpd52l2	Tumor protein D54	206	+	0.0172958	-0.849705	-0.621245	-0.446905	-0.993412	-0.757736	-0.337073	1.4791	0.974807	0.909707	0.555765
Toe1	Target of EGR1 protein 1	412	+	0.0042963	-0.878368	-0.660601	0.0701034	-0.905022	-1.46347	-0.153605	1.10925	1.13745	0.946597	0.56149
Nop56	Nucleolar protein 56	554	+	0.001	-0.663809	-0.830716	-0.394177	-0.541664	-0.615798	-0.581312	2.04904	1.54709	0.438994	-0.355562
Hmgn3	High mobility group nucleosome-binding domain-containing protein 3	93	+	0.0271111	-0.764226	-0.664541	-0.451186	-0.588994	-0.44343	-0.978216	1.36164	0.872295	1.144	0.463286
Rai14	Ankycorbin	318	+	0.0259643	-1.3242	-0.683708	-0.598564	-0.49262	-0.208633	-0.492008	1.14987	1.29867	0.831089	0.434838
Ube4b	Ubiquitin conjugation factor E4 B	31	+	0.0241942	-0.591707	-0.324884	-0.00516254	-0.434224	-0.189593	-0.885461	2.54448	0.437593	0.129389	-0.174218
Palld	Palladin	901	+	0.0113636	-0.897407	-0.87723	-0.0936501	-0.310941	0.120648	-0.681927	2.2828	1.05832	0.148737	-0.391214
Macf1	Microtubule-actin cross-linking factor 1	5547	+	0.0330435	-0.811827	0.312646	-0.261836	0.0740829	-0.592843	-0.570254	-0.343645	2.01735	-0.386537	0.341445
Myo9b	Unconventional myosin-IXb	1371	+	0.002	-0.903871	-0.740666	-0.476018	-0.739239	-0.63166	-0.611033	2.1339	1.35004	0.642076	0.047862
Mllt4	Afadin	1172	+	0.0364865	0.662192	0.793376	-0.225886	0.75512	0.872914	0.27812	-1.54886	0.155381	-0.466845	-1.30263
Mllt4	Afadin	1173	+	0.0337746	0.663675	0.806345	-0.182702	0.764739	0.892846	0.0975186	-1.98004	0.112494	-0.448558	-0.842205
Mllt4	Afadin	1719	+	0.0324964	-0.791921	-0.488531	-0.416252	-0.435889	-0.485271	-0.0237367	2.55103	0.143193	0.22328	0.0143437
Amfr	E3 ubiquitin-protein ligase AMFR	542	+	0.0288125	-0.8338	-0.306505	-0.471508	-0.4452	-0.425336	-0.309825	2.31383	0.82114	0.302301	-0.367479
Slc12a7	Solute carrier family 12 member 7	38	+	0.0136429	-0.687306	-0.768326	-0.640983	-0.748699	-0.643671	-0.813787	1.56201	1.09674	0.912067	0.609218
Gys1	Glycogen [starch] synthase, muscle	728	+	0.0251923	-0.566162	-0.545507	-0.477425	-0.276833	-0.458909	-0.244265	2.61576	0.439445	0.00393648	-0.206564
FAM120A	Constitutive coactivator of PPAR-gamma-like protein 1	386	+	0.0452471	-0.771759	-0.989096	-0.490668	-0.05167	-0.38162	-0.446203	1.03113	1.32654	1.0788	-0.513012
Atxn2l	Ataxin-2-like protein	505	+	0.0252593	-0.74798	-0.818579	-0.60601	-0.734538	-0.180844	-0.411598	1.6261	1.36543	0.745851	-0.23267
Plekho2	Pleckstrin homology domain-containing family O member 2	251	+	0.0237727	-0.290872	-0.484851	-0.297112	-0.333736	-0.741983	-0.925012	1.686	1.22312	0.772864	-0.567897
Flcn	Folliculin	313	+	0.025181	-1.03293	-0.437132	-0.839566	-0.183794	-1.15004	-0.0901353	1.2927	1.30786	0.745251	0.104272
Aimp2	Aminoacyl tRNA synthase complex-interacting multifunctional protein 2	82	+	0.005125	-0.942117	-0.478055	-0.787572	-1.06503	-0.341829	-0.578553	1.20055	1.3283	0.859491	0.703086
Ranbp2	E3 SUMO-protein ligase RanBP2;Putative peptidyl-prolyl cis-trans isomerase	2342	+	0.0056	-0.878457	-0.495747	-0.202059	-0.415673	-0.36503	-0.373788	2.40259	1.10151	-0.152814	-0.285592
Stat6	Signal transducer and transcription activator 6	641	+	0	-1.80405	0.698065	0.801853	0.2811	0.254538	-1.69577	0.872404	0.865837	0.276479	0.106257
Ahnak		211	+	0.008	-0.620352	-0.649437	-0.332907	-0.700519	-0.577117	-0.716163	2.27073	1.01602	0.395912	0.0916554
Zc3h13		1090	+	0.00448	0.604634	0.669463	0.757141	0.569531	0.470382	0.517937	-1.88186	-1.60027	-0.197131	0.0939537
Zc3h13		1093	+	0.00276923	0.613971	0.680266	0.769924	0.578075	0.476686	0.525316	-2.12708	-1.45305	-0.205912	0.091751
Pak1	Serine/threonine-protein kinase PAK 1	223	+	0.0154754	-0.441375	-1.20188	-0.110568	-0.639246	0.340294	-0.3659	2.08682	1.21645	-0.299354	-0.306565
Csf1r	Macrophage colony-stimulating factor 1 receptor	711	+	0.0114167	0.687912	-0.140528	0.930113	0.628061	0.796351	0.866207	-1.14475	-1.58002	-0.569043	-0.364006
Csf1r	Macrophage colony-stimulating factor 1 receptor	714	+	0.00505882	0.699323	-0.0159287	0.956411	0.635793	0.814427	0.888577	-1.24598	-1.55324	-0.634892	-0.417252
Csf1r	Macrophage colony-stimulating factor 1 receptor	734	+	0.0045	0.673636	0.806216	0.665199	0.669584	0.727439	0.951314	-1.34352	-1.2254	-0.819512	-0.891126
Spn	Leukosialin	381	+	0.0267241	-0.663464	-0.255013	-1.12018	-0.890658	-0.886622	-0.108961	0.853585	0.886207	1.21667	0.616379
Zfp36	Tristetraprolin	82	+	0.0235111	-1.28508	-0.749131	-0.538313	-0.283582	0.169074	-0.741418	0.911159	1.15168	1.17683	0.136978
Csf2rb	Cytokine receptor common subunit beta	778	+	0.0173333	-0.560274	-0.192892	-0.431689	-0.268966	-0.492528	-0.416457	2.51349	0.689445	0.0841709	-0.575207
Csf2rb	Cytokine receptor common subunit beta	790	+	0.0048	-0.723274	-0.524387	-0.0657013	-0.376193	-0.663616	-0.413788	2.54615	0.800903	0.166594	-0.423577
Dnajc2	DnaJ homolog subfamily C member 2	47	+	0.0306364	-0.980733	-0.566957	-0.0229788	-0.262003	-0.312466	-1.36091	1.11906	0.968369	0.842695	0.630087
Dnajc2	DnaJ homolog subfamily C member 2	49	+	0.044381	-0.914793	-0.522613	-0.00702725	-0.233576	-0.281405	-1.40789	1.0754	0.932578	0.813464	0.611952
Dab2	Disabled homolog 2	227	+	0.0170149	-1.31797	-0.758281	0.00233362	-0.331646	-0.346324	-0.831141	1.2633	0.412203	0.794862	1.15292
Zfyve26	Zinc finger FYVE domain-containing protein 26	1772	+	0.047933	0.037093	-0.167502	-0.0272197	-0.591473	-0.611573	-0.453222	2.42617	0.206814	0.285861	-0.699978
Eif4ebp1	Eukaryotic translation initiation factor 4E-binding protein 1	100	+	0.0406194	-0.106286	-0.297207	-0.0233878	-0.622416	0.434085	-0.792924	2.24014	-0.079051	0.529713	-0.694256
Tbc1d1	TBC1 domain family member 1	579	+	0.0266885	-0.784063	-0.241849	-0.769423	-0.525362	-0.355538	-0.673712	1.22677	-0.386169	1.29425	1.18008
Slc9a1	Sodium/hydrogen exchanger 1	790	+	0.0185405	-0.976618	-0.775571	-0.273324	-0.76325	-0.475512	-0.661755	1.72929	1.14509	0.555723	0.547147
Sptbn1	Spectrin beta chain, non-erythrocytic 1	2164	+	0.0237674	0.466742	-2.30406	0.410991	0.470951	0.507325	-0.818729	0.496472	-0.22023	0.392966	0.375254
Sptbn1	Spectrin beta chain, non-erythrocytic 1	2168	+	0.0335887	0.468454	-2.14633	0.410967	0.472794	0.5103	-0.936326	0.499109	-0.226956	0.392382	0.374118
Atp7a	Copper-transporting ATPase 1	362	+	0.0347671	-0.562334	-0.413309	0.934992	-0.362722	0.443633	-0.920741	2.27931	-0.378415	-0.424329	0.215069
Rftn1	Raftlin	241	+	0.00417391	-1.23536	-0.782348	-0.168211	-0.537919	-0.657146	-0.693317	1.45322	1.04359	0.742517	0.796352
Rprd2	Regulation of nuclear pre-mRNA domain-containing protein 2	457	+	0.0350748	-0.809953	-0.235019	0.200089	-0.0677156	-0.358108	-0.487846	2.51253	-0.0325322	0.418432	-0.610004
Nes	Nestin	728	+	0.045908	-0.580777	-0.704493	-0.807565	-0.461993	-0.591127	-0.725251	1.0039	1.32652	0.905644	0.360322
Nes	Nestin	731	+	0.0197867	-0.929891	-0.580118	-0.65529	-0.517253	-0.547754	-0.794004	1.05013	1.32439	0.914755	0.551776
C2cd5	C2 domain-containing protein 5	293	+	0.0309474	-1.13776	-0.612803	-0.215354	-0.295531	-0.221391	-0.560546	1.20044	1.26707	1.12233	-0.508729
C2cd5	C2 domain-containing protein 5	295	+	0.0422609	-1.03943	-0.596743	0.0853493	-0.194405	-0.742855	-0.468631	1.15844	1.2187	1.08781	-0.53218
Rhbdf2	Inactive rhomboid protein 2	357	+	0.0467865	-1.49638	-0.405847	-0.199223	-0.0723762	0.0057984	-0.594372	1.58051	0.985929	0.327512	0.113755
Rhbdf2	Inactive rhomboid protein 2	360	+	0.0236957	-1.18197	-0.651893	-0.409678	-0.260983	-0.169342	-0.873749	1.67661	0.979614	0.696326	0.306491
Eif4b	Eukaryotic translation initiation factor 4B	497	+	0.00967442	-0.554673	-0.622939	-0.506872	-1.07622	-0.318375	-0.657853	1.94088	1.15451	0.465614	0.299096
Eif4b	Eukaryotic translation initiation factor 4B	498	+	0.0134035	-0.674083	-0.71143	-0.444864	-0.680782	-0.420664	-0.784738	2.00228	1.15894	0.420126	0.241543
Baiap2	Brain-specific angiogenesis inhibitor 1-associated protein 2	324	+	0.00421053	-1.17395	-0.831511	-0.17029	-0.770706	-0.302892	-0.881836	1.09882	0.69346	1.0052	1.28224
Baiap2	Brain-specific angiogenesis inhibitor 1-associated protein 2	326	+	0.0269333	-0.887414	-0.541335	-0.538847	-0.616694	-0.212309	-1.04904	1.02343	0.618348	0.929873	1.20672
Srrm2	Serine/arginine repetitive matrix protein 2	1646	+	0.0258407	1.13451	0.910938	0.857031	-0.208741	0.829616	0.270002	-1.14981	-0.825986	-0.667051	-0.788559
Srrm2	Serine/arginine repetitive matrix protein 2	1649	+	0.00861538	0.656943	1.31183	0.650018	0.721622	0.82067	0.203653	-1.05633	-0.932532	-1.04322	-0.901106
Arhgap25	Rho GTPase-activating protein 25	521	+	0.00466667	-0.256746	-0.0577882	-0.651418	-0.181843	0.0552112	-0.390102	2.87586	-0.114072	-0.0785677	-0.645068
Iws1	Protein IWS1 homolog	185	+	0.025614	0.203725	-2.51825	0.455154	-0.552787	0.51467	0.265938	0.495458	0.451967	0.377142	0.0437423
Fam193a	Protein FAM193A	683	+	0.0235506	-0.803304	-0.237161	-0.756723	-0.862561	-0.611848	-0.407672	1.85328	0.896854	0.866702	0.124321
Dock7	Dedicator of cytokinesis protein 7	905	+	0.0113469	-0.461538	2.766	-0.47636	-0.00316547	-0.000590796	0.0366413	-0.0967077	-0.226193	-0.140262	-0.849735
Fam129b	Niban-like protein 1	650	+	0.0233882	-0.197244	-0.879684	-0.967476	-0.626411	-0.889074	-0.451837	1.48552	1.03745	0.315198	0.860876
Dync1li1	Cytoplasmic dynein 1 light intermediate chain 1	510	+	0.0116078	-0.805769	-0.53598	-0.684544	-0.721765	-0.609976	-0.754344	1.8011	0.894884	0.667248	0.741794
Dync1li1	Cytoplasmic dynein 1 light intermediate chain 1	516	+	0.00342857	-0.85247	-0.591838	-0.73536	-0.771318	-0.663323	-0.802791	1.66592	1.07351	0.953957	0.642564
Hip1	Huntingtin-interacting protein 1	319	+	0.0412994	-0.603575	-0.569736	-0.440474	-0.709605	-0.0566839	-0.441005	1.65331	-0.541892	1.24813	0.608137
Mgrn1	E3 ubiquitin-protein ligase MGRN1	428	+	0.0303566	-0.300228	0.493427	-0.239668	0.0273141	-0.572967	-0.344695	2.51746	-0.224043	0.158418	-0.965458
Fam122a	Protein FAM122A	267	+	0.0237917	-0.90152	-1.00567	-0.0468906	-0.0710906	-0.442703	-0.519698	1.72914	1.22194	0.436179	-0.341219
Ftsjd2	Cap-specific mRNA (nucleoside-2'-O-)-methyltransferase 1	28	+	0.0120741	-0.818828	1.37995	-0.567922	-0.73636	-0.794506	-0.653556	0.940227	-0.0974411	0.248021	1.33985
Golga5	Golgin subfamily A member 5	150	+	0.0200964	-0.115708	0.258078	0.377161	-0.216595	-0.0437024	-0.988846	2.51908	-0.178143	-0.234369	-0.599301
Golga5	Golgin subfamily A member 5	153	+	0.028896	-0.0330462	0.254482	0.37406	-0.431488	-0.12595	-0.703316	2.52488	-0.15697	-0.491781	-0.454001
Rps6ka4	Ribosomal protein S6 kinase alpha-4	343	+	0.0499448	-0.953687	-0.248015	0.283935	-0.449206	-0.437659	-1.12807	1.66108	0.687494	0.710096	0.188867
Epb41l1	Band 4.1-like protein 1	782	+	0.0175556	-0.491812	-0.252	-0.355534	-0.32624	-0.588689	-0.247941	2.43419	0.338392	0.655583	-0.856459
Junb	Transcription factor jun-B	252	+	0.0349722	-1.05445	-0.40472	-0.722992	-0.57086	-0.327571	-0.923249	0.927221	0.872387	0.955477	1.11674
Dab2	Disabled homolog 2	221	+	0.0236322	-1.10889	-0.901702	0.0730799	-0.35873	-0.337467	-0.893099	1.30154	0.417677	0.644778	1.19668
Gorasp2	Golgi reassembly-stacking protein 2	222	+	0.02005	-0.68426	-0.366819	-0.34866	-0.564924	-0.0195493	-0.532791	2.1918	1.17543	-0.231437	-0.254602
Gorasp2	Golgi reassembly-stacking protein 2	225	+	0.0437108	-0.620312	-0.54946	-0.141896	-0.256354	-0.304945	-0.417733	2.15205	1.06676	-0.323454	-0.315718
Rps6	40S ribosomal protein S6	244	+	0.0032	-1.14847	-0.975326	-0.196341	-0.331114	-0.120387	-1.19047	0.425671	0.854613	1.22375	1.24148
Rps6	40S ribosomal protein S6	247	+	0.00290909	-1.14847	-0.975326	-0.196341	-0.331114	-0.120387	-1.19047	0.425671	0.854613	1.22375	1.24148
Fnbp4	Formin-binding protein 4	440	+	0.0237647	0.0558943	1.03618	0.81183	0.828223	1.0229	0.361553	-0.741078	-0.719118	-1.34115	-0.782777
Fnbp4	Formin-binding protein 4	446	+	0.025578	0.567761	0.967564	0.926391	0.634001	0.840427	0.353547	-1.13916	-0.811992	-0.779567	-1.16016
Rasal3	RAS protein activator like-3	256	+	0.0383636	0.17913	0.401644	0.769144	0.668376	0.848875	0.243469	-2.16379	-0.795032	-0.376469	0.188623
Rasal3	RAS protein activator like-3	259	+	0.0200494	0.206552	0.397872	0.713854	0.627212	0.782407	0.261871	-2.40238	-0.658005	-0.27116	0.214714
Dync1li1	Cytoplasmic dynein 1 light intermediate chain 1	510	+	0.00509091	-0.951839	-0.54092	-0.601431	-0.654404	-0.319872	-0.710082	2.04604	0.42028	0.90845	0.549735
Prkag2	5'-AMP-activated protein kinase subunit gamma-2	135	+	0.0407949	-0.635865	-0.983305	-0.648808	-0.515465	-0.895144	-0.388554	1.62443	0.659837	0.889921	0.66725
Prkag2	5'-AMP-activated protein kinase subunit gamma-2	138	+	0.0469379	-1.1168	-0.657882	0.0526537	-0.391403	-0.453771	-0.880978	1.5947	0.439934	0.881796	0.665676
Prkag2	5'-AMP-activated protein kinase subunit gamma-2	143	+	0.0291746	-1.00566	-0.849501	-0.752739	-0.335417	-0.460505	-0.569801	1.67664	0.60489	0.913465	0.682102
Ftsjd2	Cap-specific mRNA (nucleoside-2'-O-)-methyltransferase 1	28	+	0.0498901	-0.671734	-0.918042	0.0910051	-0.762054	-0.40507	-0.0163488	2.16429	0.691683	0.182179	-0.122863
Numb	Protein numb homolog	238	+	0.0198537	-0.755858	-0.138895	-0.151291	-0.493558	-0.351666	-0.567306	2.39731	0.872243	-0.0853143	-0.286797
Numb	Protein numb homolog	240	+	0.0236484	-0.700009	-0.490757	-0.19721	-0.246004	-0.677276	-0.271245	2.47073	0.700397	-0.0555787	-0.256678
Numb	Protein numb homolog	241	+	0.01525	-0.658502	-0.105047	-0.359223	-0.363912	-0.0981833	-0.586307	2.50427	0.74927	-0.0186007	-0.578309
Dync1li1	Cytoplasmic dynein 1 light intermediate chain 1	513	+	0.00228571	-0.709343	-0.794975	-0.528277	-0.790401	-0.33482	-0.594302	1.94118	1.42696	0.565647	-0.110896
Ftsjd2	Cap-specific mRNA (nucleoside-2'-O-)-methyltransferase 1	29	+	0.0469091	-0.68762	-0.67147	-0.236748	-0.491681	-0.816625	0.101737	2.26138	0.683878	0.100546	-0.109259
		579		1	0.120884	0.342743	0.531044	0.00760775	0.426571	0.542703	-0.570149	-1.10224	0.0987425	-0.215352
		2885		1	-0.030862	0.657647	0.427455	-0.577303	0.0506809	0.160599	-0.691344	-0.191547	0.2214	0.084384
		2914		0.655308	0.920386	0.683045	-0.746854	0.573989	-0.838105	-0.399596	0.459774	-0.25656	0.0803734	-0.586987
Adrm1	Proteasomal ubiquitin receptor ADRM1	405;405		0.332939	-0.532785	-0.461494	-0.0173382	-0.483497	-1.42138	-0.367153	1.18368	0.7435	0.534724	0.642606
Carhsp1	Calcium-regulated heat stable protein 1	31;31		1	-0.283652	-0.0387199	0.0491332	-1.23077	-0.00494676	0.29995	0.280205	0.34985	0.401912	0.248455
Carhsp1	Calcium-regulated heat stable protein 1	33;33		0.93665	0.708447	0.00599895	0.166427	0.0973214	0.232927	-1.31369	-0.0145568	0.601776	-0.200367	-0.186587
Carhsp1	Calcium-regulated heat stable protein 1	42;42		0.980491	0.311058	0.406942	-0.28379	0.293814	-1.29566	-0.282231	0.413198	0.0643614	0.462289	-0.279807
Carhsp1	Calcium-regulated heat stable protein 1	53;53		0.741926	0.00119905	0.194667	0.279331	-1.52026	0.614588	0.415815	0.176597	-0.246601	0.348182	0.0527809
Ubc;Ubb;Rps27a;Uba52;Gm7808;Gm5239	Polyubiquitin-C;Ubiquitin;Ubiquitin-related 1;Ubiquitin-related 2;Polyubiquitin-B;Ubiquitin;Ubiquitin-40S ribosomal protein S27a;Ubiquitin;40S ribosomal protein S27a;Ubiquitin-60S ribosomal protein L40;Ubiquitin;60S ribosomal protein L40	57;57;57;57;57;57;57		1	-0.651473	-0.310768	0.251373	-0.0700594	0.723221	0.565111	0.605137	-0.180465	0.336777	-0.951612
		42		1	-0.366979	0.216959	-0.0722052	-0.391151	0.444349	0.0779799	-0.130714	0.375908	0.652149	-0.691698
		974		1	-0.381732	0.328493	0.203588	0.0913329	0.912059	-0.695067	-0.720078	-0.424868	0.29418	0.573107
		1185		1	-0.084296	0.168615	-0.39332	0.413505	-0.186414	-0.568553	-0.162865	0.377871	0.638102	-0.34614
		1011		0.918402	0.449281	-0.0559486	0.104493	0.401861	-0.0906988	-0.720999	0.290019	-0.161782	-0.953132	0.798873
		989		0.911148	-0.66209	-0.109572	-0.506095	-0.278327	-0.581618	0.270197	0.123653	0.729487	0.921222	-0.175265
Rusc1	RUN and SH3 domain-containing protein 1	800;829		0.954216	-0.877945	-0.772989	0.447491	-0.0566614	-0.369194	0.66128	0.322899	0.298093	0.503571	-0.249491
		881		1	-0.4034	0.410169	0.265233	-0.124023	0.481262	-0.203308	0.493267	-0.0466517	-0.555581	0.0955163
		490		0.694059	-1.30046	-0.211437	0.128796	0.623581	-0.633924	-0.0240861	0.146681	1.00576	0.454184	-0.331566
Tbc1d25	TBC1 domain family member 25	560		1	0.158836	-1.02463	0.572245	0.0744996	0.351601	-0.344848	-0.802679	0.377828	0.241611	0.169668
Slc9a6	Sodium/hydrogen exchanger	622		1	0.0753396	0.0609428	-0.0655288	-0.381283	-0.575262	0.336933	0.645883	0.278731	-0.0191928	-0.340055
Slc9a6	Sodium/hydrogen exchanger	693		0.0663581	-0.568559	-0.947842	-0.179814	-0.4496	-0.535144	-0.819092	1.59206	0.442807	1.17117	0.276333
Slc9a6	Sodium/hydrogen exchanger	700		1	-0.54073	-0.744447	0.387386	-0.492709	0.329156	0.320672	0.419433	0.395746	0.388448	-0.365072
Tox2		234		1	-0.220828	-0.468476	-0.11522	-0.00419669	0.0728697	-0.0919779	-0.242491	0.952641	0.221821	-0.292471
Zmynd8		464		0.995644	-0.722108	-0.473175	-0.14412	0.112334	-0.125551	-0.124442	0.0167257	0.764023	-0.446546	0.961329
Zmynd8		469		1	-0.492229	-0.631831	0.939522	0.37081	-0.341222	0.515068	0.232809	0.00586341	0.0503698	-0.59934
Zmynd8		674		1	0.374082	0.381393	0.253328	0.083872	-0.0236624	-0.219213	0.128952	0.203923	0.210752	-1.20842
Zmynd8		658		0.676808	-0.479105	-1.42322	-0.562262	0.332374	-0.52968	0.37563	0.371369	0.517014	0.47285	0.389081
Zmynd8		553		0.923446	-0.239778	-0.284345	-0.167257	-0.103193	-0.148301	-0.654398	1.00152	1.01907	0.136597	-0.459504
Zmynd8		436		1	0.118118	0.602504	0.0643224	0.518733	0.0799891	0.0437852	-0.423849	0.0578767	-0.0838686	-0.896869
Zmynd8		410		1	-0.694979	-0.011746	0.0858162	-0.00045093	0.405801	-0.13545	1.24544	0.183448	-0.113135	-0.533415
Zmynd8		499		0.73968	-0.591294	0.998872	-0.296059	0.256993	0.441175	-0.501969	-0.451436	-0.130487	-0.611234	1.05858
Zmynd8		763		1	-0.230247	0.528907	-0.404549	0.381144	0.341954	-0.115059	0.576701	-0.124064	-0.513105	-0.180929
Zmynd8		479		1	0.679832	-0.55987	0.394521	0.221109	0.314503	0.382685	-0.314978	-0.294038	-0.254087	-0.611132
Zmynd8		494		1	-0.154436	0.0725511	-0.00372316	-0.0117623	0.126494	0.238494	0.21644	0.476544	0.315394	-1.17305
Aarsd1	Alanyl-tRNA editing protein Aarsd1	88;219		0.382642	-0.581909	-0.810161	0.432678	-0.662728	-0.18194	0.931781	0.639089	0.983107	-0.00451874	-0.725483
Aarsd1	Alanyl-tRNA editing protein Aarsd1	409;540		0.948842	-1.48121	0.250027	0.334894	-0.0439387	0.232994	0.236383	0.288481	0.267269	0.180226	0.011477
Znf335	Zinc finger protein 335	976		0.796274	0.0145796	-0.799194	-0.77581	-0.531522	-0.0116945	0.356547	0.434001	0.905992	0.65769	-0.538764
Arfgef2	Brefeldin A-inhibited guanine nucleotide-exchange protein 2	276		1	0.0967633	0.118824	-0.0923815	-0.608884	-0.17393	-0.990226	0.527976	0.214578	0.360464	0.641938
Arfgef2	Brefeldin A-inhibited guanine nucleotide-exchange protein 2	1518		1	0.00830159	0.292882	0.405149	0.087573	0.249785	-0.35691	0.345528	0.130501	-0.781783	-0.0576912
Arfgef2	Brefeldin A-inhibited guanine nucleotide-exchange protein 2	1521		0.974043	-0.850526	-0.799199	0.435904	0.0488776	-0.219699	-0.0900658	-0.0311816	1.17255	0.354092	-0.174296
Arfgef2	Brefeldin A-inhibited guanine nucleotide-exchange protein 2	218		0.677706	-0.563051	-0.815318	-1.02037	0.31051	-0.00235337	-0.00422448	1.08479	0.780982	0.596837	-0.556115
Arfgef2	Brefeldin A-inhibited guanine nucleotide-exchange protein 2	227		1	0.206654	0.207677	0.448092	0.334743	-1.01821	0.451561	0.0042149	-0.817996	0.139641	-0.0459323
Arfgef2	Brefeldin A-inhibited guanine nucleotide-exchange protein 2	1022		0.173182	-1.25162	-0.964018	-0.0105945	-0.161651	-0.0339643	-0.738721	0.512085	0.818698	0.85376	0.851898
Bptf		1133		1	0.0978245	-0.418674	0.232748	0.616664	-0.338927	-0.351847	-0.28237	0.34432	0.130918	-0.232463
Bptf		1312		0.433112	0.00203554	-1.03716	0.125643	0.0287041	0.505319	-0.322358	0.747436	0.611004	0.678425	-1.25374
Bptf		228		0.995583	0.106912	-0.00435175	0.211385	0.413149	0.328637	0.247798	0.297751	0.39383	-0.572459	-1.2143
Bptf		2468		1	-1.09734	-1.01267	0.290661	-0.122321	0.641023	-0.074649	0.764789	0.410978	0.324665	0.045817
Tanc2	Protein TANC2	1462		0.519852	-0.694342	-0.420964	-0.384003	-0.461811	-0.500766	-0.777891	0.936848	0.807945	0.926169	0.476595
Tanc2	Protein TANC2	1521		0.869092	-0.675568	-1.14184	-0.25607	0.422129	-0.253615	0.187631	0.983829	0.23717	0.601403	-0.271992
Tanc2	Protein TANC2	1446		0.837699	-0.423791	-0.435878	-0.569318	-0.559662	0.115992	-0.420395	1.28223	0.699343	-0.112843	0.522579
Tanc2	Protein TANC2	1480		0.469964	-0.610256	-0.696946	-0.474029	-0.634152	-0.33023	-0.341088	0.0188692	0.932373	0.602757	1.16212
Gpatch8	G patch domain-containing protein 8	1039		1	-0.78132	-0.627443	0.061842	-0.457222	0.284841	0.445322	0.764966	0.026253	0.390652	0.0131605
Gpatch8	G patch domain-containing protein 8	648		1	-0.454471	0.271365	-0.370352	-0.103345	-0.45683	-0.47001	0.022311	0.487597	0.515593	0.424765
Gpatch8	G patch domain-containing protein 8	733		0.209577	-0.850519	0.66846	-0.238895	0.855037	-1.00223	-0.717401	1.00593	0.682818	-0.464857	0.169969
Gpatch8	G patch domain-containing protein 8	753		1	-0.677503	0.218549	-0.936711	0.18317	0.387483	0.235274	0.0495533	-0.267909	0.692468	0.0453441
Gpatch8	G patch domain-containing protein 8	1206		0.982255	0.411318	0.452573	-0.866122	-0.0337991	0.381531	-0.460696	0.122402	0.172781	0.621244	-0.778636
Gpatch8	G patch domain-containing protein 8	451		1	0.198608	0.138705	-0.850232	-0.575959	-0.922935	0.159267	0.212191	0.497727	0.484411	0.302649
Fam104a		82		1	0.361185	0.480584	-0.0689443	0.40678	-0.0878167	0.20605	-0.916802	0.13546	-0.627965	-0.0367754
Osbpl7		347		0.742788	-1.29926	-0.409054	0.539392	0.0465259	0.0211655	-0.702151	0.528005	0.264222	0.836904	0.344126
Osbpl7		393		1	-0.225843	-0.0423758	-1.29237	0.474908	0.450604	0.0599726	0.0275256	0.158156	-0.0356978	0.21097
Zmym4	Zinc finger MYM-type protein 4	121		1	0.103717	0.189856	0.328138	0.16839	0.264272	-1.20566	0.297733	0.107315	-0.0721819	0.0884177
Zmym4	Zinc finger MYM-type protein 4	242		1	-0.54894	-0.323945	0.110306	0.470375	-0.797856	-0.582811	0.75136	0.328362	0.252518	0.275598
Prdm2		735		1	-1.0134	-0.240551	0.545082	0.354564	0.659051	-0.448025	0.293206	0.233972	-0.186659	0.116954
Prdm2		638		1	-0.282958	0.062297	-0.831771	-0.463013	-0.161014	0.298105	0.933527	-0.197573	0.114136	0.529022
Rlf		631		1	0.0349131	0.749469	0.154712	-0.0251172	0.108556	-0.0894276	-0.174619	-0.370612	-0.0281117	-0.150233
Kiaa1522	Uncharacterized protein KIAA1522	842		1	0.248477	-0.59897	0.239364	-0.202565	0.159417	0.258106	0.290515	0.0134483	0.185268	-0.570479
Kiaa1522	Uncharacterized protein KIAA1522	883		0.300842	-0.822647	-0.993229	0.00865285	-0.549151	-0.189332	-0.583379	1.63455	0.476273	0.589524	0.5439
Kiaa1522	Uncharacterized protein KIAA1522	543		1	-0.602877	-1.02903	-0.592518	-0.303151	0.283455	0.149756	0.467566	0.52456	0.638769	0.245834
Kiaa1522	Uncharacterized protein KIAA1522	402		0.801701	-0.593074	-1.14427	0.0863169	-0.329046	-0.379215	0.163827	1.11016	0.664124	0.836689	-0.497261
Kiaa1522	Uncharacterized protein KIAA1522	909		1	-0.817957	-0.824517	0.133004	-0.422874	-0.209755	-0.106414	1.11457	0.503667	0.42367	0.259934
Kiaa1522	Uncharacterized protein KIAA1522	952		0.840362	-1.47337	0.135641	0.40379	-0.369836	0.154577	0.0527041	-0.0724817	0.387369	0.711856	0.225132
Kiaa1522	Uncharacterized protein KIAA1522	959		1	-0.641346	-0.148073	0.545107	0.064705	-0.188378	0.480719	0.658709	-0.263782	0.097368	-0.388189
Kiaa1522	Uncharacterized protein KIAA1522	1003		1	0.388389	0.0997127	-0.123009	-0.359811	0.110927	-0.339017	0.602949	0.0544618	0.0445609	-0.306518
Kiaa1522	Uncharacterized protein KIAA1522	159		1	-0.340402	0.041621	0.462156	-0.455995	0.559116	0.503586	-0.341801	-0.113891	0.674599	-0.808716
Kiaa1522	Uncharacterized protein KIAA1522	445		1	-0.664822	0.342312	0.262051	-0.0445176	0.857295	0.193807	0.12138	-0.147533	-0.296618	-0.227596
Kiaa1522	Uncharacterized protein KIAA1522	610		0.907304	-0.282552	-0.23087	0.362711	-0.0181196	0.358912	-0.359265	1.18472	0.645097	-0.424941	-0.816828
Kiaa1522	Uncharacterized protein KIAA1522	213		1	0.310228	-0.803272	0.534618	-0.242441	-0.594757	0.0525901	0.538038	0.411436	0.350243	-0.638027
Cd300lh;Gm11709	CMRF35-like molecule 3	231;231		1	0.0972162	-0.645931	0.916905	-0.529875	0.0129119	-0.468336	0.630827	0.533155	-0.101689	-0.216506
Miip	Migration and invasion-inhibitory protein	307		1	-0.534556	-0.172727	0.366326	-0.0969707	0.698566	0.158443	-0.0655623	0.375846	0.032194	-0.554908
Fbf1	Fas-binding factor 1	185		0.999505	-0.534048	-0.667594	0.000215451	-0.523797	-0.0836054	-0.498095	1.06138	0.717389	0.0611774	0.54458
Tmem201	Transmembrane protein 201	441		1	0.188715	0.31014	0.595134	0.372525	0.563375	-0.304222	0.210657	-0.934842	-0.174663	-0.406993
Osbpl9	Oxysterol-binding protein-related protein 9	324		0.998754	-0.564394	0.429782	-0.749614	-0.0847747	-0.00347729	-0.220494	-0.167831	-0.213172	0.728417	0.722772
Osbpl9	Oxysterol-binding protein-related protein 9	325		1	0.641065	-0.230312	0.148582	-0.549685	-0.575607	0.120802	0.683419	0.336366	-0.415896	-0.152214
Osbpl9	Oxysterol-binding protein-related protein 9	326		1	-0.393129	-0.432256	0.537077	-0.318821	0.601344	0.389806	0.462171	-0.158693	-0.1036	-0.291815
Osbpl9	Oxysterol-binding protein-related protein 9	329		1	0.39556	-0.413124	0.666628	0.0902354	0.603143	-0.617108	0.152248	-0.534139	0.0460657	-0.137285
Sec14l1		578		1	-0.201389	0.262299	0.0955437	0.0635334	-0.0402287	0.165595	0.273988	0.149293	-0.107528	-0.513204
Szt2	Protein SZT2	1395		1	0.399888	0.875183	-0.568494	0.0186707	-0.272448	-0.271111	0.23896	0.0787977	-0.398817	-0.0323288
Szt2	Protein SZT2	1650		0.870265	-0.746359	-0.118533	0.193975	-0.163021	-0.727482	-0.562424	1.25924	0.329634	0.191271	0.4955
Kiaa1109	Uncharacterized protein KIAA1109	2300		1	-0.248241	0.619476	0.160225	-0.485175	0.211455	0.508184	-0.275129	-0.00690159	0.0520122	-0.356899
Kiaa1109	Uncharacterized protein KIAA1109	4613		1	-0.573401	0.7547	0.194214	-0.115294	0.225639	0.00735503	-0.0164178	-0.748095	0.786534	-0.225701
Kiaa1109	Uncharacterized protein KIAA1109	1355		0.930919	-1.03534	-0.431061	0.746866	0.241017	0.688113	0.678965	-0.177396	0.120199	0.0620807	-0.686816
Kiaa1109	Uncharacterized protein KIAA1109	3619		0.954498	-1.18011	0.0153116	-0.716558	-0.218301	0.160374	0.441492	0.57577	0.582619	0.0635296	0.284594
Kiaa1109	Uncharacterized protein KIAA1109	3835		0.437256	-0.096656	0.669586	1.11891	-0.00929156	-1.41599	0.295827	-0.348378	0.259743	0.370692	-0.838409
Kiaa1109	Uncharacterized protein KIAA1109	2764		1	-0.424748	-0.0282967	0.440285	-0.117132	0.434608	-0.400076	0.148843	-0.121458	0.191816	0.125019
Kiaa1109	Uncharacterized protein KIAA1109	2755		1	0.133833	-0.292343	0.500959	-0.363137	0.47317	0.437075	0.180565	-1.05482	0.276979	-0.0766909
Kiaa1109	Uncharacterized protein KIAA1109	2603		1	-0.115284	-0.694553	-0.117825	0.635189	0.0749597	0.329069	0.46073	0.0442214	-0.202913	-0.482764
Sh3pxd2b	SH3 and PX domain-containing protein 2B	550		0.243597	-1.00418	-0.690161	0.412075	-1.13998	0.901719	0.381432	0.0576359	0.525545	0.823444	-0.0972184
Sh3pxd2b	SH3 and PX domain-containing protein 2B	499		1	-0.924708	-0.344687	0.156644	-0.185194	-0.0299522	0.274394	0.328608	0.386003	0.564101	-0.197555
Sh3pxd2b	SH3 and PX domain-containing protein 2B	291		0.545668	-0.891185	-0.230389	-0.0874174	-0.655454	0.0312604	-0.394889	1.6155	0.736346	0.304521	-0.0960559
Arhgap27	Rho GTPase-activating protein 27	614		1	0.127109	0.307867	0.285355	0.136275	0.391479	0.170661	-1.06001	0.124326	0.213675	-0.715565
Arhgap27	Rho GTPase-activating protein 27	459		0.88728	-0.977813	-0.718988	0.0930978	-0.207035	-0.0808926	0.154565	1.21599	0.726426	0.196149	-0.274195
Arhgap27	Rho GTPase-activating protein 27	469		0.760222	0.036772	0.505107	-0.241819	-0.0936341	0.352876	1.24238	-0.73243	-0.343791	-0.872556	0.11803
Arhgap27	Rho GTPase-activating protein 27	155		1	-0.502908	0.212372	0.168373	-0.0449886	0.203448	0.359066	-0.15346	0.101944	0.249408	-0.485572
Arhgap27	Rho GTPase-activating protein 27	632		0.983304	-0.515801	-0.93509	0.459628	-0.414815	-0.724273	0.615746	0.462658	0.560482	0.432378	-0.125183
Ddi2	Protein DDI1 homolog 2	120		1	-0.687475	-0.444863	-0.140617	-0.457122	0.0811361	0.660353	0.0328111	0.389332	0.2079	0.240662
Ddi2	Protein DDI1 homolog 2	121		0.62496	0.527077	-0.0500994	0.619813	0.105459	0.496153	-0.947187	1.07337	-0.74116	-0.291979	-0.256637
Ddi2	Protein DDI1 homolog 2	128		0.787261	-0.201861	-0.973529	-0.10021	-0.0830046	-0.115588	0.0540636	1.56101	0.152318	-0.377075	0.176794
Dock11	Dedicator of cytokinesis protein 11	1237		0.836482	0.0752022	0.5073	-0.770884	-0.973975	0.661757	0.099855	0.121219	0.152634	-0.406702	0.663442
Dock11	Dedicator of cytokinesis protein 11	1240		1	0.061073	0.582978	0.0420352	-0.302906	-0.0556937	-0.339607	0.0030689	-0.0654793	0.566037	-0.34841
Dock11	Dedicator of cytokinesis protein 11	296		1	-0.463471	0.457728	-0.169777	0.0225999	-0.600097	-0.328548	0.171258	-0.272577	0.522732	0.624929
Dock11	Dedicator of cytokinesis protein 11	23		1	-0.603727	-0.774056	-0.623966	-0.0340861	0.519322	0.030033	0.4902	-0.245578	0.627245	0.517488
Tmem185b;BC023829	Transmembrane protein 185B	333;333		1	-0.0100191	-0.241511	-0.613054	0.113413	0.134768	0.602111	-0.507309	-0.559748	0.157372	0.6172
	Uncharacterized protein CXorf23 homolog	410		1	-0.749758	-0.515122	-0.011106	0.371936	0.236553	0.161723	0.142899	0.519885	0.298181	-0.491885
	Uncharacterized protein CXorf23 homolog	205		1	-0.242063	0.396637	-0.0318628	0.364276	0.334233	0.118385	-0.174411	-0.484896	-0.111676	-0.0374728
Med12	Mediator of RNA polymerase II transcription subunit 12	636		1	0.48285	0.486662	-0.397066	0.230401	-0.0709264	-0.792909	0.20487	-0.373881	-0.387666	0.67355
Med12	Mediator of RNA polymerase II transcription subunit 12	699		1	0.0599618	-1.15711	0.298451	0.299861	0.135402	0.176208	0.219715	0.353924	-0.610651	0.0983567
Ambra1	Activating molecule in BECN1-regulated autophagy protein 1	1206		1	0.172303	-0.0692021	0.594187	-0.405689	0.394397	-0.440648	0.0772997	-0.192653	-0.17326	0.292435
Camsap1	Calmodulin-regulated spectrin-associated protein 1	1135		1	0.0893961	-0.3673	0.240005	-0.272406	-0.511734	0.301098	0.163756	0.428637	-0.465594	0.275324
Camsap1	Calmodulin-regulated spectrin-associated protein 1	553		0.819827	-0.338451	-0.880492	-0.767176	-0.271102	1.25926	0.107447	0.732322	0.0373437	0.0973707	0.109457
Camsap1	Calmodulin-regulated spectrin-associated protein 1	560		0.745448	-0.432232	0.104488	0.576785	0.0579682	0.574516	0.403562	0.56247	-0.249068	0.27862	-1.42254
Kiaa1429	Protein virilizer homolog	173		1	0.0124345	-0.162056	0.585854	-0.420569	1.25635	0.00727355	-0.00829538	-0.452609	-0.0678423	-0.332575
Kiaa1429	Protein virilizer homolog	1577		0.97165	-0.71589	0.172303	-0.304792	0.411235	-0.276659	-0.113455	0.142558	-0.64577	0.442925	0.820898
Kiaa1429	Protein virilizer homolog	1578		0.534167	1.12714	-0.209059	0.549048	-0.393948	0.492002	0.2375	-0.956941	0.208141	-0.278496	-0.806624
Kiaa1429	Protein virilizer homolog	584		1	0.220142	0.285118	0.0646113	-0.642345	0.657232	0.0610593	0.198863	-0.759229	0.333906	-0.117902
Card9		461		1	-0.104123	-0.538768	0.77954	-0.33278	0.220233	0.143591	0.536905	-0.353924	-0.132995	0.0317991
Card9		451		1	-0.34096	-0.393348	0.627572	-0.0865529	0.457331	0.188503	0.542123	-0.274371	-0.256074	-0.155804
Card9		528		1	0.158804	-0.0809131	0.153503	0.1926	-1.44634	0.205213	0.589204	0.201395	0.168737	-0.338338
Card9		431		1	0.0365151	-0.167899	0.747369	-0.470596	-0.259245	0.362087	0.434104	0.261928	-0.210252	-0.545428
Sdccag3	Serologically defined colon cancer antigen 3 homolog	241		0.589073	-1.11008	0.301296	-0.150921	0.0470706	-0.145826	0.365922	0.631001	0.943847	0.400423	-1.12384
Sec16a		2101		1	-0.378451	-0.765124	0.124753	0.225852	0.208974	-0.0796721	1.21532	-0.573808	0.28292	-0.0647804
Sec16a		1028		1	-0.163522	-0.262855	0.230367	0.351771	0.58012	0.142595	0.17155	-0.196419	-0.584065	-0.0897454
Sec16a		1362		1	-0.74038	0.217126	0.606589	0.038391	-0.262724	0.0656737	0.132815	-0.377464	-0.25022	0.743644
Sec16a		554		1	-0.754782	-0.389264	0.764565	-0.480361	0.201722	-0.362662	0.810657	0.380608	0.345814	-0.169377
Sec16a		2305		0.96182	-1.05966	0.185013	0.0539068	-0.0119555	0.559276	0.713995	-0.514125	0.0292972	-0.392992	0.508264
Man1b1	Endoplasmic reticulum mannosyl-oligosaccharide 1,2-alpha-mannosidase	102		1	-1.06859	-0.124357	0.257708	-0.264563	-0.017849	0.169179	0.327882	0.388717	0.244182	0.198532
Pnpla7	Patatin-like phospholipase domain-containing protein 7	429		1	-0.292226	-0.468842	0.581627	-0.122707	0.595633	-0.704047	0.650083	-0.152497	-0.109373	0.361975
Pnpla7	Patatin-like phospholipase domain-containing protein 7	341		1	-0.199615	0.361984	0.794286	-0.858206	0.187907	0.300092	-0.180389	0.214013	-0.418676	0.0895508
Map7d1	MAP7 domain-containing protein 1	519		1	-0.408344	-0.0998122	-0.788107	-0.131473	0.239473	0.340697	-0.0629814	-0.0772099	0.0591108	0.75079
Map7d1	MAP7 domain-containing protein 1	544		1	-0.320275	0.388469	-0.509941	0.160184	-0.648166	-0.146123	-0.0152576	-0.0142431	0.129709	0.77942
Map7d1	MAP7 domain-containing protein 1	401		0.495107	-0.114954	0.544575	0.865278	0.356545	0.192522	-0.233383	-0.294422	0.467341	0.113851	-1.57036
Map7d1	MAP7 domain-containing protein 1	460		1	0.116741	0.811986	0.4877	-0.264704	-0.276574	-0.275726	0.124103	-0.334408	0.0310995	-0.133415
Map7d1	MAP7 domain-containing protein 1	115		1	-0.854966	-0.560808	0.259107	-0.135648	0.195779	0.539444	0.610837	0.439254	0.305683	-0.672452
Map7d1	MAP7 domain-containing protein 1	118		1	-1.08059	-0.0861104	-0.216037	0.146023	0.306752	0.369633	-0.610925	0.15658	0.51688	0.34621
Map7d1	MAP7 domain-containing protein 1	127		1	-0.363546	0.132508	-0.0396562	0.188326	-0.0783653	-0.0729655	-0.157257	0.321052	0.146765	-0.112554
Chd7	Chromodomain-helicase-DNA-binding protein 7	1864		1	-0.915286	0.582302	0.405817	-0.417226	0.156261	-0.249286	0.50072	0.543649	0.1965	-0.392176
Chd7	Chromodomain-helicase-DNA-binding protein 7	2945		1	-0.00220565	0.635735	0.242508	0.472216	-0.153628	-0.516092	0.404378	-0.20412	-0.295035	-0.301509
Chd7	Chromodomain-helicase-DNA-binding protein 7	2548		1	-0.125008	0.0360809	-0.567209	-0.403353	-0.981801	0.241319	0.525879	0.80404	-0.00100087	0.22429
Pnisr	Arginine/serine-rich protein PNISR	211		1	-0.331002	-0.0823531	0.398899	-0.477888	0.291368	0.123908	0.14252	0.174343	0.452369	-0.504556
Pnisr	Arginine/serine-rich protein PNISR	726		0.716575	0.297334	0.240788	0.529899	0.563314	0.898008	-0.157531	-0.142573	0.0891299	-0.591337	-1.3455
Pnisr	Arginine/serine-rich protein PNISR	290		0.990323	-0.14718	-0.473237	-0.0345387	-0.239227	-0.0361732	-0.828362	0.817616	0.92361	-0.132927	0.218836
Dcaf10	DDB1- and CUL4-associated factor 10	50		0.928361	0.0191917	-0.541097	-0.754018	-0.175005	-0.288126	-0.667441	0.949673	0.608696	0.853441	-0.163706
Dcaf10	DDB1- and CUL4-associated factor 10	67		1	-0.758857	-0.508361	-0.00394	-0.329225	0.416305	0.16252	0.342202	0.719815	0.229953	-0.208861
Setx	Probable helicase senataxin	1376		1	0.707802	-0.469878	0.211392	0.0188801	0.230297	-0.330568	0.234541	-0.277721	0.040294	-0.313452
Cntrl	Centriolin	1355		1	-0.338221	-0.543238	-0.409335	0.604493	0.336124	-0.427206	0.775033	-0.01837	0.500622	-0.440255
Cntrl	Centriolin	832		1	-0.0202634	-0.796461	0.409241	-0.0198368	0.691986	0.0387062	0.631019	-0.353052	-0.460736	0.113344
Ubr4	E3 ubiquitin-protein ligase UBR4	178		0.972728	0.411099	0.482671	0.651901	0.375842	0.499799	-0.141942	-0.0437938	-0.78443	-0.674185	-0.379318
Ubr4	E3 ubiquitin-protein ligase UBR4	181		1	-0.532587	-0.584767	-0.411881	-0.242986	0.718668	0.180066	0.227928	0.38196	0.0150408	0.236045
Ubr4	E3 ubiquitin-protein ligase UBR4	1761		1	-0.2551	0.157749	-0.426116	0.282504	-0.106647	-0.349363	0.313442	0.347395	-0.226993	0.247736
Ubr4	E3 ubiquitin-protein ligase UBR4	2715		1	0.24083	-0.701468	-0.490249	-0.333784	0.435875	0.508322	0.520599	0.422845	-0.364484	-0.297294
Ubr4	E3 ubiquitin-protein ligase UBR4	2716		1	-0.112683	-0.232636	0.0693125	-0.681333	-0.229391	0.0971289	0.664583	0.0190071	0.514781	-0.0408014
Ubr4	E3 ubiquitin-protein ligase UBR4	2740		1	0.339961	0.349929	0.80674	0.0215021	0.149525	0.0218337	-0.185031	-0.388624	-0.284226	-0.551319
Ubr4	E3 ubiquitin-protein ligase UBR4	2882		0.710425	0.992068	-0.212933	1.10291	0.0421716	-0.2449	-0.58649	0.390671	-0.378199	-0.149883	-0.696481
Atp8b4		1154		1	-0.483718	0.0158422	-0.652771	-0.120861	0.0683819	-0.0514771	-0.1264	0.0608163	0.959058	0.157393
Mdn1	Midasin	4827		0.997697	-1.36927	0.0309517	0.193404	0.237805	0.266244	0.170349	0.300178	0.241168	0.0289795	0.097887
Mdn1	Midasin	5012		1	0.209375	0.372863	-0.836638	0.161703	-0.0349385	-0.594995	0.271225	0.18313	0.029881	0.181522
Tpx2	Targeting protein for Xklp2	486		1	-0.0250385	0.236799	-0.26556	-0.158255	0.0580816	0.195738	-0.194739	0.189538	0.123833	-0.201752
Tpx2	Targeting protein for Xklp2	737		1	0.0507216	-0.0591838	-0.252633	0.109235	-0.216269	-0.0605495	-0.41265	0.28057	0.35762	-0.0320443
Fmnl2	Formin-like protein 2	183		0.992259	-0.608574	-0.230549	0.800427	0.268581	0.61212	0.063762	-0.338192	-0.209041	-0.78923	0.641648
Fmnl2	Formin-like protein 2	171		1	-0.353925	-0.101188	0.456737	-0.220572	0.744265	-0.547532	0.178798	0.128155	-0.132935	0.16785
Skt	Sickle tail protein	1843		0.656122	0.332465	-0.229342	1.6344	-0.246101	0.299129	-0.699959	-0.545279	-0.563811	-0.373989	0.682218
Skt	Sickle tail protein	1647		0.724427	-1.02559	0.374102	-0.65748	-0.338755	1.02205	-0.398341	1.04128	0.324902	-0.308754	0.411567
Bcorl1	BCL-6 corepressor-like protein 1	597		1	-0.0528382	-0.0829545	-0.185597	0.394508	-1.20992	0.0722223	0.269471	-0.0242518	0.207328	0.309781
Ppig	Peptidyl-prolyl cis-trans isomerase G	685		1	0.414363	-0.370992	0.3999	0.336625	-0.301129	-0.167324	0.395232	-0.778974	0.112483	-0.0094303
Ppig	Peptidyl-prolyl cis-trans isomerase G	395		1	-0.449055	0.710104	-0.675227	0.0942535	0.00981826	0.175693	0.0377494	0.12082	0.155026	-0.158571
Ppig	Peptidyl-prolyl cis-trans isomerase G	413		1	-0.922793	0.345166	0.627454	0.272547	0.263157	-0.027378	-0.219194	-0.0678529	-0.517938	0.500977
Cep152		1587		1	-0.230826	0.187203	0.255375	0.429825	0.286721	-0.0826885	0.249315	0.161369	-0.795663	-0.215977
Baz2b		1437		0.997578	-0.571191	0.119838	-0.542277	0.00506161	-0.188216	0.0154197	1.42072	0.288102	-0.0826502	-0.262294
Baz2b		1513		1	0.0659436	-0.797579	-0.294982	-0.165784	0.618951	-0.585316	0.28329	0.464836	0.493089	-0.13003
Prr5l	Proline-rich protein 5-like	28		0.73898	-0.791155	-0.34698	0.911733	-0.242165	1.18844	0.709197	0.279023	-0.325622	-0.419326	-0.455088
Slc43a3	Solute carrier family 43 member 3	259		0.540351	0.231021	0.877408	-0.0248298	0.552825	-0.72867	0.553405	-1.06873	0.300155	-1.02528	0.0964893
Rabgap1	Rab GTPase-activating protein 1	42		0.378904	0.587007	-0.0425129	-0.145919	-0.128564	0.329373	0.610326	1.17867	-1.25649	-0.770066	-0.031926
Mga	MAX gene-associated protein	286		1	-0.283582	0.447308	0.417202	-0.762871	-0.134715	-0.0461103	-0.389365	-0.0137323	0.516668	0.334304
Mga	MAX gene-associated protein	287		1	0.0921434	0.0660386	-0.440949	-0.0906335	-0.0235524	0.11131	0.145212	0.452731	0.537597	-0.913209
Gpr155		835		1	-0.409174	-0.305772	0.588693	0.262332	0.0634079	-0.160485	0.571751	0.333435	-0.408573	-0.306095
Las1l	Ribosomal biogenesis protein LAS1L	20		0.899671	-0.128654	0.378473	0.237434	0.43795	-0.0883911	-0.192457	-0.0909897	0.95564	-1.11208	-0.287793
Arid1a	AT-rich interactive domain-containing protein 1A	697		0.90394	-1.02743	0.0718725	-1.11019	0.177579	0.326171	0.461112	0.231597	0.373542	0.27677	0.0988377
Arid1a	AT-rich interactive domain-containing protein 1A	365		1	0.442222	0.294068	-0.503451	0.386499	0.36304	-0.469076	-0.479978	0.218898	-0.649085	0.315283
Arid1a	AT-rich interactive domain-containing protein 1A	1183		0.993512	-0.107459	-0.19362	0.549594	0.37147	-0.0638022	-1.21614	0.0741951	0.0298028	0.586015	0.0615327
Arid1a	AT-rich interactive domain-containing protein 1A	1185		0.926569	-0.203375	0.50376	-0.613384	-0.708177	0.330882	0.633576	0.793714	0.454755	-0.32938	-0.608629
Arid1a	AT-rich interactive domain-containing protein 1A	1605		1	0.0634859	-0.32959	0.0495855	-0.202542	0.412765	0.715038	0.508405	0.0884543	-0.654276	-0.491035
Arid1a	AT-rich interactive domain-containing protein 1A	384		1	-0.0463482	0.25353	0.322677	0.733678	0.0399571	-0.477872	0.601042	-0.178938	-0.124749	-0.818675
Qser1		505		1	-0.801454	0.615648	-0.39946	-0.425625	-0.0037282	0.363788	0.60393	0.256808	0.221631	-0.227441
Arid4b	AT-rich interactive domain-containing protein 4B	756		1	0.206505	0.472444	0.322158	0.0871858	0.485726	0.0246755	-0.288066	0.205423	-0.289577	-0.978408
Arid4b	AT-rich interactive domain-containing protein 4B	295		1	-0.154559	0.544795	-0.0845614	0.0219192	0.0736175	0.212414	-1.02049	0.588486	-0.119804	-0.183477
Arid4b	AT-rich interactive domain-containing protein 4B	296		1	-0.923216	0.606615	-0.0115622	0.0994861	-0.105244	0.716522	-0.659048	0.19758	-0.00412946	0.0406872
Arid4b	AT-rich interactive domain-containing protein 4B	675		1	0.604815	0.568682	0.528824	-0.496362	0.391169	-0.833217	0.170014	-0.131572	-0.412497	0.0248167
Uhrf1bp1l	UHRF1-binding protein 1-like	1020		0.289952	-0.483002	-0.93017	-0.379925	0.153924	0.875729	-0.0951804	1.7507	0.297484	-0.558757	-0.301719
Uhrf1bp1l	UHRF1-binding protein 1-like	418		1	0.114493	-0.41821	-0.883678	0.0439066	-0.0494265	0.0471375	-0.0829532	0.126655	0.57135	0.172159
Uhrf1bp1l	UHRF1-binding protein 1-like	934		1	-0.594128	0.423535	-0.108956	-0.377705	0.29279	0.796569	0.394589	-0.043092	-0.56349	0.0303774
Uhrf1bp1l	UHRF1-binding protein 1-like	888		0.975809	0.329042	0.376566	-0.595151	-0.375841	0.181463	-0.297722	1.22957	0.274606	-0.0294901	-0.794929
Rsrc2	Arginine/serine-rich coiled-coil protein 2	45		0.836439	0.309388	0.743262	0.0603584	-0.0991828	0.857457	-0.130567	0.683737	-0.455535	-0.852691	-0.530024
Palm3	Paralemmin-3	87		0.105464	-0.84272	-0.462037	-0.0466124	-0.985415	-0.797049	-0.427999	1.25323	0.923209	0.925886	0.446394
Tbc1d8b	TBC1 domain family member 8B	952		1	-0.536873	-0.157529	0.666718	-0.178525	0.352307	-0.0981697	-0.145215	0.109997	-0.0378396	0.204198
Plcb2	1-phosphatidylinositol 4,5-bisphosphate phosphodiesterase beta-2	472		0.846118	0.117147	-0.0819192	-0.0537434	-1.24934	0.119033	-0.484805	0.612907	0.661955	0.60281	-0.0949789
Ralgapa2	Ral GTPase-activating protein subunit alpha-2	819		1	-0.606496	-0.165019	0.305727	-0.166592	-0.532853	0.423353	0.830306	0.282596	0.461355	-0.722837
Ralgapa2	Ral GTPase-activating protein subunit alpha-2	820		0.869299	-0.444744	-0.512888	-1.40219	0.104472	0.573431	0.765851	0.0375289	0.069215	0.365985	0.117311
Ralgapa2	Ral GTPase-activating protein subunit alpha-2	362		0.663081	-0.0576586	0.353427	0.742165	-0.142459	0.641563	0.0820491	0.818006	-0.567822	0.172152	-1.40263
Phrf1	PHD and RING finger domain-containing protein 1	1201		1	-0.0698588	0.0536725	-0.00115711	0.127091	0.177079	-1.19877	0.212996	0.335278	0.29895	0.175363
Phrf1	PHD and RING finger domain-containing protein 1	919		1	-0.0881348	0.199784	0.36099	0.0484919	-0.145554	-0.608293	0.372877	-0.147532	0.42919	-0.224795
Phrf1	PHD and RING finger domain-containing protein 1	13		1	-0.587044	0.376702	0.225181	-0.292388	0.483648	0.531639	0.379141	-0.172914	-0.720791	0.142994
Phrf1	PHD and RING finger domain-containing protein 1	622		1	-0.277861	-0.246274	0.360469	-0.0456698	0.606322	-0.571166	0.709746	-0.0935317	-0.131299	0.0468291
Rabgap1l	Rab GTPase-activating protein 1-like	119		0.9791	-1.04552	0.295695	0.702474	-0.570338	-0.0567783	-0.116371	0.549376	0.172193	0.43212	0.00983909
Herc6;Herc3	E3 ISG15--protein ligase Herc6	779;823		1	-0.855366	-0.829937	-0.182163	0.179898	0.473924	-0.0715317	-0.166608	0.538134	0.337808	0.399645
Dennd4c	DENN domain-containing protein 4C	740		1	0.115441	-0.644274	0.416629	0.330176	0.45042	-0.338413	0.016353	-0.681005	0.108667	0.285789
Dennd4c	DENN domain-containing protein 4C	1057		0.657923	0.114481	0.0497103	-1.08455	-0.484185	-0.139677	1.00846	0.0859685	0.816049	0.0780721	-0.716468
Dennd4c	DENN domain-containing protein 4C	720		1	-0.530264	0.497358	0.0554622	0.171978	-0.117403	-0.379613	-0.390905	0.48984	0.144695	0.0699783
Dennd4c	DENN domain-containing protein 4C	1221		0.603213	-0.853459	-0.939809	0.414117	-0.152297	0.107843	-0.0354193	1.65041	-0.228241	0.331492	0.0135053
Dennd4c	DENN domain-containing protein 4C	1659		0.879039	-1.06532	-0.092514	0.546554	-0.632351	0.268213	0.524292	0.639365	0.451452	-0.590256	0.290974
Dennd4c	DENN domain-containing protein 4C	1637		1	-0.133486	-0.0715567	0.593899	-0.455277	0.423248	0.602722	-0.0506264	0.0504479	-0.146132	-0.5895
Dennd4c	DENN domain-containing protein 4C	920		1	-0.43449	-0.375968	0.0889933	0.220315	0.605954	0.542674	0.370655	-0.261379	-0.164345	-0.42
Dennd4c	DENN domain-containing protein 4C	1274		1	-0.242366	-0.615837	0.63028	-0.154019	0.336215	0.0473895	0.573031	-0.0809141	-0.162172	-0.100685
Dennd4c	DENN domain-containing protein 4C	1321		1	-0.158217	-0.0486719	0.0673066	-0.278642	0.643647	0.56777	-0.231065	0.0765532	0.0875416	-0.618419
Dennd4c	DENN domain-containing protein 4C	987		1	-0.314107	-0.318619	0.44128	-0.334717	0.486667	0.120423	0.357934	0.01285	-0.0292436	-0.180652
Arhgap31	Rho GTPase-activating protein 31	1242		0.423469	-0.874097	-0.938461	-0.159521	-0.00635143	-0.146939	-0.572471	1.40051	0.368253	0.313227	0.65475
Arhgap31	Rho GTPase-activating protein 31	829		0.974567	-0.150421	-0.282991	-0.330558	-0.362529	-0.385123	-0.422339	1.30949	0.48392	0.39536	-0.177103
Arhgap31	Rho GTPase-activating protein 31	272		1	0.0266035	0.0217861	0.332701	-0.72918	0.570792	-0.390859	0.434632	-0.0820967	-0.480606	0.636205
Arhgap31	Rho GTPase-activating protein 31	850		0.243609	-1.10737	-0.943336	-0.417432	-0.460344	-0.203564	-0.357577	0.968693	1.19198	0.952482	0.227561
Arhgap31	Rho GTPase-activating protein 31	1092		0.184622	-0.517883	0.777342	0.224574	-0.588346	-0.48183	0.175037	1.62413	0.66643	-0.496088	-0.847314
Arhgap31	Rho GTPase-activating protein 31	1093		0.60476	-0.315955	-1.01462	-0.230678	0.388272	0.659221	0.526387	-0.887059	-0.683076	0.587686	0.601538
Arhgap31	Rho GTPase-activating protein 31	765		1	0.113147	0.254807	-0.183364	0.450528	0.636038	0.0221992	-0.638943	-0.55338	0.398335	-0.482233
Arhgap31	Rho GTPase-activating protein 31	1163		0.815063	-0.582417	0.0225946	-0.148715	-1.19899	0.863111	0.388205	0.298823	-0.312289	0.415291	0.51334
Arhgap31;Arhgap30	Rho GTPase-activating protein 31;Rho GTPase-activating protein 30	303;292		1	0.247116	0.382127	0.395854	-0.408688	0.838789	0.306471	-0.76556	0.115627	-0.617487	-0.281445
Arhgap31	Rho GTPase-activating protein 31	464		1	-0.614294	-0.06447	0.757721	-0.518842	0.641219	-0.218471	0.130145	0.341112	0.200754	-0.288719
Arhgap31	Rho GTPase-activating protein 31	586		0.971453	-0.581736	-0.413007	0.67037	0.0581183	0.849281	-0.834619	1.02967	-0.124697	-0.030309	-0.0889967
Dpy19l1	Probable C-mannosyltransferase DPY19L1	22		0.744552	-0.768305	0.52138	0.570879	0.00958635	0.606617	0.0466892	0.786605	0.312836	-0.816841	-0.648075
Dpy19l1	Probable C-mannosyltransferase DPY19L1	23		0.758026	-0.61373	0.526526	0.575907	-0.0600976	0.611558	0.0114795	0.791115	0.318482	-0.913596	-0.621367
Dpy19l1	Probable C-mannosyltransferase DPY19L1	46		0.849341	-0.773653	0.666575	-0.702912	-0.647259	0.976694	-0.0517693	-0.416727	0.620583	-0.0199105	0.479287
Pfkfb3		490		0.982385	-0.408573	-0.486168	0.261566	-1.06125	0.408574	0.307385	0.248387	0.608426	0.670081	-0.440341
Mllt6		273		1	0.192048	-0.424059	0.637299	-0.250639	0.383411	0.306651	-0.107187	0.301076	-0.238111	-0.678124
Mllt6		400		0.951992	-0.247357	-0.452305	-0.476889	-0.954875	-0.186215	0.257532	0.576241	0.713327	0.911874	-0.276126
Chd3		765		1	0.029227	-0.706205	0.281146	-0.144787	0.733765	-0.251279	0.378053	-0.225477	0.669797	-0.592551
Chd3		649		1	-0.0707503	-0.277107	0.773563	0.757325	-0.84541	-0.336305	0.155328	-0.236774	0.365032	-0.333308
Chd3		1651		0.996115	-0.104339	0.0412817	-1.15786	-0.113839	0.12255	1.09449	0.0688769	-0.152036	0.0951944	-0.125611
Vps13d		2435		1	-0.0887477	-0.313361	0.503561	0.509481	0.379407	-0.0871755	-1.23763	0.158132	0.0100256	-0.000701472
Vps13d		1039		1	0.572721	-0.556995	-0.197746	-0.0597664	-0.370404	0.0745834	0.764811	0.109067	-0.512741	0.086386
Vps13d		3011		1	-0.320329	0.687106	-0.186492	-0.440686	0.58359	-0.204068	0.246354	-0.0118075	-0.138433	0.117406
Vps13d		1728		1	-1.02165	0.642697	0.0825543	-0.354152	-0.0198353	-0.031805	0.391394	0.00807923	0.49261	0.0843103
Zfp362		399		0.836439	-0.848288	0.764686	0.0520646	-0.559147	0.630748	-0.668011	0.371146	0.690731	-0.166316	0.187048
Zfp362		402		1	-0.650972	-0.94377	-0.159221	0.166348	-0.164107	0.430977	0.237205	0.445262	0.69271	-0.311907
Arhgap4		429		1	0.254038	0.316826	0.255149	-0.264837	-0.745581	-0.932707	0.397018	0.5152	0.217294	0.0434516
Arhgap4		431		0.906861	-0.262503	-0.934245	-0.106415	0.276623	-0.248149	0.738475	0.627773	0.476789	-0.68633	-0.0472771
Arhgap4		949		1	-0.196193	-1.11627	0.103267	0.0830279	-0.0348831	-0.264156	0.0734941	0.5959	0.0345627	0.477652
Phactr2		280		1	-0.275539	-0.429626	0.274873	-0.276636	-0.150125	0.316061	-0.479072	0.278685	-0.166618	0.712008
Phactr2		520		0.969882	-0.188029	0.303049	-0.3253	0.411792	-0.245993	-0.164714	0.443272	-0.420892	0.949144	-0.718571
Kif16b	Kinesin-like protein KIF16B	575		1	-0.421661	-0.320139	0.632651	0.367609	0.592213	0.164497	0.351015	-0.286777	-0.40698	-0.358494
Kif16b	Kinesin-like protein KIF16B	1145		1	-0.21445	-0.0935506	0.448974	-0.616373	-0.449398	-0.642877	0.947053	0.345461	0.446155	0.0422744
Uprt	Uracil phosphoribosyltransferase homolog	25		0.423394	-1.68601	-0.00959205	0.271135	-0.336786	0.526378	0.551334	0.225584	-0.0247948	0.224543	0.511585
Zcchc7	Zinc finger CCHC domain-containing protein 7	517		0.506783	-0.407318	-0.589735	-0.273293	-0.363523	-0.305768	0.0380673	1.83052	0.656972	0.318095	-0.738585
Nhsl2	NHS-like protein 2	690		0.462995	-0.0635485	0.446871	0.228202	0.472199	0.667626	0.622837	-0.207118	-1.47871	-0.771748	0.367281
Nfx1	Transcriptional repressor NF-X1	147		1	0.353457	-0.00244557	0.424079	0.182841	0.408395	0.067063	-0.532526	-1.12586	0.241316	0.0580593
Nfx1	Transcriptional repressor NF-X1	81		0.970647	-0.140863	-0.182766	0.0304481	0.141221	0.22036	-1.1009	1.10616	0.562361	-0.230707	-0.111756
Usp24	Ubiquitin carboxyl-terminal hydrolase 24	2601		0.99308	0.760135	-0.0717613	0.669102	-0.432006	-0.247275	-0.190857	-0.054861	-0.902869	0.0759522	0.468242
Usp24	Ubiquitin carboxyl-terminal hydrolase 24	1940		1	-0.14541	-0.0432765	-0.0664816	0.316973	0.291747	-0.812472	1.20589	-0.00281747	-0.316422	-0.0807582
Usp24	Ubiquitin carboxyl-terminal hydrolase 24	2074		0.745456	0.0888567	0.760942	0.199341	-0.185709	1.02772	-0.5611	-0.762709	0.622643	-0.697098	-0.186566
Usp24	Ubiquitin carboxyl-terminal hydrolase 24	1296		0.993378	0.366435	0.146738	-0.978812	-0.515057	0.224634	0.258847	0.724666	0.240106	0.281339	-0.719589
Usp24	Ubiquitin carboxyl-terminal hydrolase 24	1138		1	-0.159506	0.522797	-0.417489	0.55444	-0.836139	0.560298	-0.349446	0.211785	-0.188793	-0.168017
Usp24	Ubiquitin carboxyl-terminal hydrolase 24	1140		1	-0.277397	0.179872	-0.6243	0.422708	0.27292	-0.568474	-0.478176	0.80031	-0.144611	0.254727
Usp24	Ubiquitin carboxyl-terminal hydrolase 24	2558		1	-0.139288	0.260786	-0.24272	0.463954	0.764118	-0.0565796	-0.657354	0.0871984	0.123986	-0.572893
Usp24	Ubiquitin carboxyl-terminal hydrolase 24	2044		1	0.409456	0.370989	-0.652632	-0.188593	-0.496826	0.458087	-0.29653	0.474959	-0.196993	-0.150667
Tmem245	Transmembrane protein 245	12		1	-0.0573746	0.0970968	-0.0650047	0.211985	-0.0268703	0.510718	-0.232704	0.302498	-0.79506	-0.00215425
Tmem245	Transmembrane protein 245	327		0.885111	-0.483786	-0.40479	-0.547999	0.140369	-0.978271	0.403192	1.18124	0.141749	0.501548	-0.140706
Tmem245	Transmembrane protein 245	329		0.796298	-0.35391	-1.01122	0.448153	-0.649452	0.339374	0.373212	-0.630325	-0.251897	1.04073	0.481824
Thoc2	THO complex subunit 2	1417		1	-0.403759	-0.530798	0.0883101	-0.312491	0.237391	-0.24399	-0.336958	0.755827	0.698053	-0.0870991
Thoc2	THO complex subunit 2	1219		0.79869	0.470886	0.0207061	0.496902	0.259201	-0.602194	-1.43538	0.495895	0.354033	0.145645	-0.102865
Uhrf1bp1		929		1	-0.205091	0.196164	0.266029	-0.322852	0.206936	0.278067	0.176976	-0.027112	-0.419944	0.062354
Uhrf1bp1		936		1	-0.387826	-0.283243	0.741936	-0.0864838	0.588783	0.152896	0.109285	-0.189139	0.0282477	-0.385267
Uhrf1bp1		1098		1	-0.458639	-0.23503	0.0388766	0.173626	-0.293589	-0.320508	-0.0460902	-0.134716	0.600293	0.541819
Uhrf1bp1		914		1	0.334795	-0.450887	0.621043	0.564044	0.296179	0.500365	-0.553213	-0.588543	-0.508717	-0.236786
Cad		1859		0.255069	-0.697093	-1.04067	0.109014	-0.863765	-0.402202	-0.0158777	0.0269205	0.959418	0.882394	0.715124
Cad		10		1	-0.118063	0.113656	0.334997	0.185179	0.542106	0.0182963	0.171647	-0.0454493	-0.734914	-0.176854
Cad		1900		0.608476	0.571811	-0.380099	0.657331	-0.606567	0.424478	0.49709	-0.126408	0.0491074	0.370043	-1.31296
Phf3		125		1	0.87195	-0.675793	-0.30798	-0.19643	0.192898	-0.351696	-0.403596	-0.183724	0.685436	0.0703184
Phf3		1909		0.615023	-0.954342	-0.265874	-0.744356	-0.158465	0.00118096	-0.478198	0.693765	1.26787	0.365044	0.194555
Phf3		1127		0.0590485	-0.108544	-0.896404	-0.623048	-0.825055	-0.24367	-0.362532	1.56125	1.30592	0.421245	-0.279627
Phf3		1529		0.0927059	-0.37344	-0.712527	-0.111429	-0.334903	-0.173695	-0.77032	1.94478	0.953063	0.378024	-0.562772
Phf3		377		1	-0.328765	0.0859585	0.365525	-0.455202	-0.212401	0.438998	0.654035	0.350984	-0.140536	-0.535316
Phf3		510		0.418281	-0.641668	-0.298432	-0.635456	-0.202545	-1.18652	-0.0699799	1.14126	0.955637	0.0865689	0.606345
Phf3		660		0.934531	0.305267	0.407783	0.504571	-0.00317617	0.500445	0.323143	0.478869	-0.468237	-0.279973	-1.29578
Ythdc2	Probable ATP-dependent RNA helicase YTHDC2	1105		1	-0.207871	-0.887262	0.553793	-0.167055	0.486518	0.0257959	0.573556	0.0389713	0.0157132	-0.250507
Ythdc2	Probable ATP-dependent RNA helicase YTHDC2	1238		1	-0.071589	-0.360742	-0.0278999	-0.323317	0.499222	-0.131058	0.176297	0.357963	0.338471	-0.385628
Otud4	OTU domain-containing protein 4	1016		0.916618	-0.715735	0.486436	-0.00679018	0.070884	-0.353787	0.554096	0.0237257	-0.120295	0.893671	-0.79481
Otud4	OTU domain-containing protein 4	1017		1	0.561816	0.751092	0.415176	-0.186992	-0.668137	0.0836003	-0.275968	-0.354627	0.0991735	-0.369593
Otud4	OTU domain-containing protein 4	1000		0.331068	-0.771623	-0.283132	-0.751603	-0.940696	-0.269008	-0.0254581	1.11109	0.987476	0.600642	0.294152
Rrn3	RNA polymerase I-specific transcription initiation factor RRN3	42		0.990181	-0.461902	-0.319384	-0.508146	-0.588514	0.262404	0.27103	-0.720624	0.689849	0.555502	0.498347
Zfc3h1		658		1	-0.692378	-0.322417	-0.439427	-0.148431	0.313493	0.164609	-0.332534	0.477743	-0.0300471	0.814168
Zfc3h1		29		1	-0.415268	0.290145	0.538734	0.333227	-0.27338	0.0507093	0.311142	0.0713251	-0.00175345	-0.688221
Zfc3h1		952		0.835629	0.0198777	-0.171891	0.739004	0.705969	0.575042	0.296989	0.0869912	-0.497951	-1.12441	-0.322332
Zfc3h1		356		1	-0.466505	-0.51075	0.289212	-0.476001	0.163928	-0.420563	-0.0868168	0.611755	0.756388	0.103246
Apba1	Amyloid beta A4 precursor protein-binding family A member 1	246		0.993764	-0.877749	-0.21895	0.264622	0.624906	0.0593141	0.350976	-0.408502	0.575295	-0.55644	0.11065
Apba1	Amyloid beta A4 precursor protein-binding family A member 1	267		0.724497	-0.910461	-0.170028	0.0717981	-0.352786	-0.0195737	-0.535405	1.12714	1.11221	-0.33817	0.267613
Apba1	Amyloid beta A4 precursor protein-binding family A member 1	84		0.96647	-0.938704	-0.0163744	-0.350593	-0.544025	0.247715	0.0209376	0.850159	0.528581	0.474817	-0.0897872
Apba1	Amyloid beta A4 precursor protein-binding family A member 1	573		0.753285	0.311511	0.226794	0.525655	0.00443132	0.259395	-1.62065	0.473612	0.193431	0.098835	-0.10165
Unc13d	Protein unc-13 homolog D	149		0.742056	-1.48773	0.203461	0.56848	0.299978	0.36162	0.135152	0.264871	0.300543	-0.448218	0.15145
Zcchc24	Zinc finger CCHC domain-containing protein 24	93		1	-0.501806	-0.18365	0.480031	-0.450592	0.23936	0.178671	-0.345027	0.0596312	-0.110493	0.681553
Ep300	Histone acetyltransferase p300	1037		1	0.20709	0.268832	-0.41156	-0.796603	0.225185	-0.321981	0.375716	0.466471	-0.174561	0.275952
Ep300	Histone acetyltransferase p300	1725		1	-0.635191	-0.390142	0.517435	0.432808	-0.217322	-0.201994	0.454196	-0.0411772	0.0364154	0.136014
Ep300	Histone acetyltransferase p300	500		1	-0.475853	0.0459173	0.189713	-0.211716	0.211043	-0.847878	0.779876	0.551189	-0.132102	0.196446
Ep300	Histone acetyltransferase p300	2306		1	-0.234338	-0.341657	-0.417681	-0.0745376	-0.586401	-0.381647	0.219424	0.563745	0.592912	0.378603
Tagap;Tagap1	T-cell activation Rho GTPase-activating protein;T-cell activation GTPase-activating protein 1	488;279		0.379075	-0.608861	-0.679186	-0.657543	-0.334235	0.108949	-0.664967	-0.185273	0.940337	0.627666	1.09985
Abcc3	Canalicular multispecific organic anion transporter 2	903		0.936382	-0.0252313	0.143905	-0.697694	1.06339	0.087532	0.31963	-0.957479	0.239004	-0.0805887	-0.448399
Abcc3	Canalicular multispecific organic anion transporter 2	904		0.523217	-0.762709	-0.0876022	-0.339033	-0.751806	-0.806537	-0.0166562	0.79597	0.362076	0.99029	0.506707
Abcc3	Canalicular multispecific organic anion transporter 2	923		1	0.58086	-0.402228	-0.253209	0.228826	0.150481	0.533547	-0.4151	-0.77016	0.130845	-0.0138762
Zcchc11	Terminal uridylyltransferase 4	176		0.0703045	-0.590014	-0.791862	-0.444367	-0.657869	-0.485828	-0.539832	1.79259	0.963215	0.738549	0.0330476
Zcchc11	Terminal uridylyltransferase 4	131		1	-0.432708	-0.584643	-0.0852746	-0.260806	0.635016	-0.0824122	0.576904	0.238297	0.255612	-0.124485
Cspp1	Centrosome and spindle pole associated protein 1	869		1	-0.314	-0.13932	0.577865	-0.0340081	0.717295	-0.200899	-0.020901	0.357335	-0.217562	-0.44207
Itpkb		42		1	-0.371156	-0.266401	0.181752	-0.315532	0.000666119	-0.530626	1.33853	-0.0175624	0.0513466	0.24262
Itpkb		247		0.936288	-0.29537	-0.388706	0.297269	-0.668136	0.122721	0.262576	1.17594	-0.606224	0.574294	-0.172559
Itpkb		189		1	-0.0495916	-0.499137	0.504576	-0.157021	0.583027	-0.287702	0.539391	0.261865	0.036793	-0.650238
Hnrnpa3;Gm8991;Gm6793;Gm9242	Heterogeneous nuclear ribonucleoprotein A3	112;90;90;90		0.973898	-0.294124	0.0453563	-0.747604	0.217444	-0.567966	-0.154601	0.597088	0.656876	0.653146	-0.573897
Hnrnpa3;Gm8991;Gm6793;Gm9242	Heterogeneous nuclear ribonucleoprotein A3	116;94;94;94;61		1	0.559991	-0.255731	-0.0112322	-0.178377	-0.0248104	-0.372221	0.288286	-0.64553	0.386351	0.252403
Hnrnpa3;Gm8991;Gm6793;Gm9242	Heterogeneous nuclear ribonucleoprotein A3	359;280;331;337		0.430204	-0.231013	0.327232	0.527022	0.48872	0.617182	0.920797	0.409797	-0.920057	-0.543159	-1.12621
Ppfia1		797		0.989052	0.29953	0.188304	-0.528365	0.134828	0.213456	-0.965279	-0.590227	0.628724	0.264776	0.175045
Ppfia1		239		1	0.027038	0.158357	0.505254	-0.267417	0.421611	0.427249	0.617417	-0.33765	-0.509581	-0.616617
Plxnb2	Plexin-B2	1248		1	-0.121257	-0.372032	0.746013	0.186072	-0.056862	0.131876	0.627843	-0.704077	0.0821705	-0.283506
Plxnb2	Plexin-B2	1574		1	-0.793617	0.151303	0.700818	0.280808	0.287202	-0.585306	-0.315025	0.172815	0.39399	-0.0869133
Dock5	Dedicator of cytokinesis protein 5	1788		0.177975	-0.975825	-0.805995	0.0601177	-0.501686	-0.0606052	-0.371034	1.48821	-0.242293	0.645356	0.934186
Dock5	Dedicator of cytokinesis protein 5	1832		1	-0.446197	-0.28181	0.559089	-0.283198	0.706991	0.470476	-0.909919	-0.111638	0.332665	-0.0178707
Dock5	Dedicator of cytokinesis protein 5	1765		0.496971	0.122992	0.525463	0.622989	0.332723	0.979173	0.469414	-1.6016	-0.0955861	-0.183607	-1.04045
Dock5	Dedicator of cytokinesis protein 5	1802		0.944467	0.292582	-0.833828	0.584272	0.709486	0.146855	-0.473091	-0.103376	0.656753	-0.362092	-0.669082
Rbm25	RNA-binding protein 25	698		1	-0.363608	0.0757427	0.817721	0.186877	0.478121	-0.31131	0.362165	0.0794627	-0.133222	-0.758512
Rbm25	RNA-binding protein 25	672		1	0.784797	-0.115395	0.736679	0.368282	0.191714	0.266618	-0.454033	-0.506341	-0.888669	-0.29391
Rbm25	RNA-binding protein 25	578		1	-0.408555	-0.636976	0.136598	-0.121793	-0.536941	-0.0143663	1.22368	0.475833	0.227753	-0.298641
Pdzd8		828		1	-0.86804	0.229091	0.869747	-0.240125	0.223643	0.23173	0.19571	0.318778	-0.00242189	-0.578564
Pdzd8		515		0.0738537	0.0202147	0.219908	-1.64566	-1.01558	0.470154	0.0962472	-0.72277	0.913874	0.819271	0.424751
Pdzd8		532		1	0.0979276	0.0497673	0.600125	-0.197502	0.44302	0.323126	0.260287	-0.356687	-1.05988	0.178116
Osbpl8	Oxysterol-binding protein	305		1	-0.201775	-0.918964	0.730705	0.33883	0.343569	0.155491	0.261222	-0.524761	-0.362196	0.282011
Osbpl8	Oxysterol-binding protein	314		1	-0.507057	0.276688	0.475948	-0.430973	0.343312	0.270609	0.304461	0.205957	0.206714	-0.795556
Osbpl8	Oxysterol-binding protein	65		0.637693	-0.588528	-0.612922	-0.470121	-0.983399	-0.213141	-0.195541	1.19952	0.906246	0.710329	0.223388
Osbpl8	Oxysterol-binding protein	328		1	0.0249499	-0.530798	0.208976	0.341809	0.381167	0.0262456	-0.0816402	0.242518	0.0233231	-0.642124
Osbpl8	Oxysterol-binding protein	331		1	0.0435957	-0.138611	0.364345	-0.942945	0.321488	0.304635	0.228913	0.0885179	0.208876	-0.284781
Osbpl8	Oxysterol-binding protein	342		1	-0.0821494	-0.212929	-0.17291	-0.0276716	0.152379	-0.14289	0.695428	0.340117	0.256452	-0.690334
Osbpl8	Oxysterol-binding protein	14		0.833695	-1.08078	0.0284193	0.260251	0.236884	-0.51435	0.482908	0.546698	0.556407	0.347345	-0.783522
Tmf1	TATA element modulatory factor	138		0.69179	-1.70006	0.202807	-0.207324	0.151094	-0.0166399	0.457202	0.488081	0.160951	0.262522	0.3181
Tmf1	TATA element modulatory factor	340		1	-0.467238	-0.264232	-0.0433281	-0.0515313	-0.00237529	0.520163	0.295667	0.334194	0.405389	-0.730275
Mndal;Ifi203	Myeloid cell nuclear differentiation antigen-like protein;Interferon-activable protein 203	109;109		1	-0.0399973	0.180607	0.300714	0.135208	0.710219	0.35556	-1.24567	0.208609	-0.125873	-0.49291
Mndal;Ifi203	Myeloid cell nuclear differentiation antigen-like protein;Interferon-activable protein 203	110;110		1	-0.730085	-0.779509	0.88767	-0.081784	0.239022	0.135122	-0.439676	0.122096	0.576771	0.0472493
Mndal	Myeloid cell nuclear differentiation antigen-like protein	156		1	-0.11332	-0.124881	0.316676	0.0621346	-0.680106	-0.0946663	0.178568	-0.0366938	0.943114	-0.528261
Zbed6	Zinc finger BED domain-containing protein 6	383		1	0.130282	0.0123446	0.185833	-0.557891	0.305177	0.345269	0.455023	0.202555	0.187536	-1.02653
Mtx3		284		1	-0.925393	0.105718	-0.302105	-0.644249	-0.0493502	0.227421	0.477538	0.220844	0.544119	0.403407
Ccnyl1		352		0.983918	0.0231733	0.0822454	0.319638	-1.42688	0.410598	0.182	0.299586	0.235977	0.152535	-0.000853456
Ccnyl1		111		0.912724	0.687457	0.500675	0.882024	0.0503658	-0.630625	-0.257477	-1.09708	0.216013	-0.185537	-0.252066
Ccnyl1		118		0.964747	0.0151143	-0.582123	0.350774	0.0329805	-0.722973	0.414128	0.715195	0.483812	-1.06281	0.296122
Psma5;Gm8394	Proteasome subunit alpha type-5;Proteasome subunit alpha type	16;16		0.471404	-0.510997	-0.95563	-0.851253	-0.164585	0.0918243	-0.561525	1.44691	0.31586	0.942715	0.179647
Samd1	Atherin	150		1	-0.722447	-0.848006	0.29468	-0.113906	0.266847	0.271572	0.246768	0.601076	-0.0950108	0.0885001
Safb	Scaffold attachment factor B1	24		1	-0.42632	0.0576741	0.241595	0.0193705	-0.207416	0.367104	0.0837297	0.219526	0.556189	-0.867556
Safb;Safb2	Scaffold attachment factor B1;Scaffold attachment factor B2	366;387		1	-0.897666	-0.498814	-0.735764	0.149033	-0.0445989	0.202389	0.934582	0.650241	0.407343	-0.252893
Safb;Safb2	Scaffold attachment factor B1;Scaffold attachment factor B2	235;229		1	0.0433544	0.174124	0.581912	0.46873	0.202002	0.589225	0.222057	-0.801935	-0.40017	-0.784277
Safb	Scaffold attachment factor B1	354		0.749892	0.471569	-0.1152	1.04453	0.495121	0.645231	-0.0563282	-0.81669	-0.517122	-0.771828	-0.189812
Safb	Scaffold attachment factor B1	623		1	-0.12951	-0.129537	-0.286032	0.211699	0.208225	-0.0449202	0.311548	0.27943	0.0146347	-0.409486
Safb	Scaffold attachment factor B1	626		1	0.0763703	0.035227	0.267542	0.218422	0.387035	0.411203	0.136256	0.180606	-1.24202	-0.264123
Safb;Safb2	Scaffold attachment factor B1;Scaffold attachment factor B2	298;292		1	0.671602	-0.209432	0.752876	0.27027	0.0445375	-0.117655	-0.203439	-0.175667	-0.326972	-0.609986
Klp6	Kinesin-like protein KLP6	1003		0.931818	0.333496	0.362394	-1.22252	-0.624579	-0.333692	0.56338	0.456923	0.173882	0.161363	-0.0548703
Klp6	Kinesin-like protein KLP6	1004		0.944744	0.339745	0.367875	-1.10764	-0.77035	-0.208006	0.563515	0.45989	0.160262	0.116714	-0.043976
Ccdc6	Coiled-coil domain-containing protein 6	237		0.286765	-0.66833	-0.500742	0.0578804	-0.812496	-0.841832	-0.429085	1.22827	0.834841	0.760428	0.356962
Ccdc6	Coiled-coil domain-containing protein 6	45		1	-0.165118	0.317183	-0.0313068	-0.721587	-0.456753	-0.40929	0.252243	0.772709	0.0580625	0.404199
Zc3h3;Gm7353	Zinc finger CCCH domain-containing protein 3	380;380		0.67321	-0.543164	-0.0960104	0.0281249	0.192002	-0.227087	-0.367359	1.57488	0.66257	-0.0353124	-0.868667
Zc3h3;Gm7353	Zinc finger CCCH domain-containing protein 3	370;370		1	0.0988738	0.411132	-0.463314	-0.338174	-0.0638766	-0.0209117	0.250024	0.226601	0.323621	-0.390484
Zc3h3;Gm7353	Zinc finger CCCH domain-containing protein 3	212;212		1	-0.273053	0.494265	0.483413	-0.660733	-0.289584	-0.259999	-0.456962	0.581337	0.559846	-0.120746
Ddx23		108		1	-0.00424565	-0.207492	-0.0342189	-0.0103904	0.437702	-0.0280618	-0.19399	0.120765	0.0125193	-0.0920871
Rpl29;Gm5218;Gm17669;Gm10709	60S ribosomal protein L29	138;138;138;138		1	0.087927	-0.0497778	0.0677144	0.207275	0.572518	0.440821	-0.366148	-0.21522	-0.414942	-0.27409
Tmppe		315		1	-0.0191579	-0.00132994	0.46391	0.131255	0.223078	0.320189	-0.231785	0.302248	-1.27444	0.199501
Sepn1		13		1	-0.277616	-0.514198	0.792497	0.45238	0.379757	0.265295	-0.00156617	-0.0141683	-0.0366525	-0.881605
Bin2	Bridging integrator 2	443		1	-0.272971	0.155048	0.0471997	0.153141	-0.428377	-0.925486	0.9106	0.547043	0.227689	-0.24277
Bin2	Bridging integrator 2	380		1	0.17151	0.212133	0.14217	-0.0591232	0.102241	-0.530445	-1.06871	0.227002	0.521008	0.129172
Bin2	Bridging integrator 2	463		0.770798	-0.158927	-0.876418	0.0302868	0.635262	-0.567411	0.630602	0.848628	-0.291964	0.34444	-0.735726
Bin2	Bridging integrator 2	464		1	0.385717	0.542082	-0.0609846	-0.60508	0.721335	-0.516521	-0.658904	-0.0365085	0.380666	-0.0159197
Piezo1	Piezo-type mechanosensitive ion channel component 1	1385		0.524545	-0.770288	-0.489485	-0.314772	-0.533619	-0.480963	-0.549733	1.03862	1.12324	0.673675	0.241674
Piezo1	Piezo-type mechanosensitive ion channel component 1	1610		1	-0.0859893	0.666386	0.114963	0.00739208	-0.100574	0.677627	-0.103913	0.22246	-0.851894	-0.402243
Piezo1	Piezo-type mechanosensitive ion channel component 1	1631		0.642733	0.408568	-1.32963	0.336573	-0.444118	-0.352356	0.467028	0.320798	0.570775	0.559643	-0.793435
Piezo1	Piezo-type mechanosensitive ion channel component 1	1646		1	-0.360677	-0.389154	0.0398802	0.0189733	0.4513	0.170682	0.22775	0.266315	0.30892	-0.651546
Kifc1;Kifc5b	Kinesin-like protein KIFC1	492;490		0.927716	-0.212812	-0.643614	-1.16591	0.468147	-0.817541	0.398807	0.174161	0.56471	0.38159	0.239239
AU019823		138		1	-0.182437	0.0127893	-0.00120024	0.410377	0.232009	0.185341	-0.205718	0.27064	-0.721168	0.00883755
Dgkd		44		1	-0.498303	-0.387079	0.618208	-0.0564335	-0.266894	-0.205313	-0.373497	0.679555	0.585117	-0.197676
Ankhd1		1678		1	-0.268337	-0.206089	-0.214764	0.272529	0.469793	0.228074	-0.0656574	0.101066	-0.0589087	-0.261885
Ankhd1		1554		1	0.25541	0.137879	0.354101	-1.08387	-0.0236048	-0.112554	0.24556	0.501321	-0.261735	0.165977
Trim5;Trim12c		86;86		1	0.0894652	-0.167923	-0.599837	-0.564019	-0.693365	0.0334351	0.0245686	0.542424	0.793904	0.182208
Mki67		2333		1	-0.136555	-0.229104	-0.504532	0.00720687	0.223626	0.373272	0.0347662	-0.0713036	-0.16078	0.344592
Mki67		517		0.770729	0.380249	0.395459	0.485313	0.209596	-1.24703	0.476781	0.457985	0.0123673	-0.842212	-0.305577
Mki67		162		1	-0.0896229	0.555089	0.179124	0.132635	-0.0665964	-0.00937587	-0.214557	0.133967	0.0912071	-0.598605
Mki67		2980		1	0.0475711	0.0987046	-0.198717	-0.0202792	-0.194808	-0.14355	-0.503209	0.0880863	0.361439	0.265254
Mki67		2649		1	0.611955	-0.0731112	0.477938	-0.0668766	0.26394	-0.180119	0.384179	0.19572	-0.998722	-0.351667
Mki67		2392		1	0.00579005	0.169769	-1.22945	0.0173318	-0.0708823	0.170008	-0.117943	0.106595	0.155532	0.481123
Mki67		2257		1	0.0633485	0.405522	-0.283893	-0.322762	-0.538779	0.236588	0.483909	-0.335381	-0.244163	0.552299
Mki67		2425		1	-0.81869	0.288496	-0.136382	0.0378686	0.071958	0.348443	0.16525	0.232229	0.406549	-0.498391
Mki67		2545		1	0.202667	-0.11176	-0.194006	0.343623	-0.552307	0.31993	-0.255074	-0.205583	0.0872545	0.0869691
Mki67		337		1	0.124806	0.278916	-0.370535	0.00610799	-0.650369	-0.0317278	-0.225485	-0.112653	0.236094	0.502979
Mki67		498		0.973703	0.237791	-0.709833	0.520442	0.496366	0.367486	0.0687924	0.106311	-0.0158518	0.169159	-1.16956
Mki67		1587		1	0.223388	0.283912	-0.340247	0.220749	-0.105281	0.154422	-0.441155	-0.0180148	0.0284495	-0.156915
Mki67		1000		1	0.046906	-0.234275	-0.0145619	0.466632	0.349183	0.105436	-0.426097	0.0735822	-0.377597	-0.0706463
Golgb1		1792		1	0.18461	0.0855514	0.408162	0.249921	0.22682	0.197019	0.234854	0.143096	-1.08627	-0.404913
Golgb1		2655		1	-0.350782	-0.350076	1.04275	-0.0971529	-0.144855	0.203395	0.662016	0.116111	-0.248575	-0.530374
Golgb1		548		0.93677	-0.523687	-0.229836	0.655924	-0.401922	0.506468	0.073214	1.09272	-0.707775	0.0600199	-0.0188075
Rasal2		163		1	-0.230655	0.176876	-0.0699228	0.419873	-0.0361182	0.219083	0.178479	0.463431	-0.135529	-0.923189
Rasal2		165		0.621453	0.48067	0.186454	0.496794	0.410392	-0.811193	0.670621	-0.66563	0.628583	-0.958169	-0.636917
Trappc8		273		0.86564	-0.377854	-1.33577	-0.0333855	0.103575	0.670138	0.656544	-0.0660789	0.305529	-0.492944	0.378969
Trappc8		1090		1	-0.354946	-0.788327	0.228194	0.294681	-0.211523	0.282758	0.849168	0.485029	-0.0186745	-0.746982
Trappc8		1384		0.541642	0.462996	-0.188334	0.446484	-0.00790492	0.568509	0.486228	-0.334759	-0.554903	0.55573	-1.31107
Ncapg		1004		1	0.167324	0.518477	-0.555943	0.387024	0.43042	-0.174954	-0.0376184	-0.345696	0.238954	-0.539153
Slc4a1ap		258		1	-0.408985	-0.31677	0.532765	0.130449	-0.115065	-0.27301	0.775812	0.281779	-0.110342	-0.277449
Ahnak2		286		1	-0.127056	-0.293702	0.773972	-0.188914	0.175771	0.11901	0.188849	-0.0343331	-0.115693	-0.286681
Ahnak2		634		1	-0.206389	-0.622028	-0.0315738	-0.434596	0.286524	0.578666	0.538999	0.449655	-0.244707	-0.27157
Ahnak2		503		0.579142	-0.605835	-1.49562	0.117786	-0.0504878	0.00237922	-0.371457	0.465501	-0.12096	0.848083	0.983126
Ahnak2		517		1	0.185838	0.443049	0.337692	-0.0516927	0.246729	0.0874364	-0.316297	0.383868	-0.20356	-0.93527
Ahnak2		597		0.62007	-0.898369	-1.02859	-0.484879	-0.424498	0.576942	-0.0702555	0.0441321	0.630766	0.525887	0.905767
Fam98c		129		0.855556	-0.184596	-0.184825	0.325017	0.124426	0.318915	0.351855	0.563423	0.263325	0.206036	-1.52794
Ap1ar		49		0.725589	-1.03201	0.0607946	-0.048877	-0.962658	0.402436	0.638618	0.530491	0.456179	-0.0707459	0.261979
Setd1a		1110		1	0.650187	-0.107449	0.658281	-0.310832	0.677448	0.190374	-0.731488	-0.269585	-0.267623	-0.365115
Setd1a		521		1	-0.10263	-0.274564	-0.0750415	-0.391906	0.160613	0.463418	-1.01558	0.624229	0.216002	0.0943161
Setd1a		1159		1	0.477673	-0.42207	-0.217979	0.0138632	0.612149	-0.0138467	0.507841	0.289803	-0.426544	-0.700904
Setd1a		1160		0.936451	-0.214449	-0.169697	-1.18418	-0.202365	-0.329023	0.520675	0.376954	0.639392	0.509274	-0.273069
Setd1a		930		0.991772	0.0151438	-0.251274	-0.977243	0.643189	-0.766609	-0.0129577	0.434537	0.0121781	0.71379	-0.200902
Setd1a		483		0.29254	0.22951	-0.541022	-1.0226	0.28441	-0.0344246	1.25806	0.0116841	-0.253792	0.627107	-0.955519
Setd1a		1246		0.996289	-0.477958	0.0669315	-0.196258	-0.360798	0.28479	0.188125	-1.04908	0.778678	-0.0370083	0.579174
Parp4		133		0.603149	0.445493	-0.608876	0.227161	-0.70723	0.575827	1.19648	-0.46463	-0.315802	0.362139	-0.778193
Parp4		1683		1	-0.508218	0.00191769	0.333248	0.206592	0.273375	0.402791	-0.196923	-0.308117	0.268038	-0.369798
Prr12		911		0.74858	1.03303	0.818558	-0.280701	-0.515691	0.693105	-0.0207825	-0.12522	-0.520284	-0.735499	-0.0700755
Prr12		648		1	-0.137482	0.31238	0.474455	0.110578	0.272729	-0.758686	0.0773153	-0.175159	0.194125	-0.0860346
Prr12		1924		0.996376	0.164097	0.837891	0.553312	-0.338027	-0.48656	-0.832916	0.554735	-0.176139	0.296377	-0.207926
		1401		0.889894	0.250072	0.293277	0.595667	-0.597488	0.764966	0.0351517	-1.15976	0.282707	0.267362	-0.608419
Brd1		906		0.104513	-1.28251	-0.375035	-0.424011	-0.25237	-0.45428	-0.220958	1.37631	1.39767	0.0474698	0.218467
Brd1		1186		1	0.0461738	0.162041	0.238887	0.116123	0.338206	0.516835	0.44658	-0.0809575	-0.149617	-1.33784
Gm20390;Nme2	Nucleoside diphosphate kinase;Nucleoside diphosphate kinase B	235;120		0.845747	-0.0906289	-0.354528	-0.105105	0.730874	0.892648	0.073884	-1.24446	0.43535	-0.216366	-0.324528
Chd2		1365		1	-0.294457	-0.558598	-0.899434	0.239664	0.143891	0.0369119	0.141271	0.200407	0.00223935	0.694889
Chd2		1727		0.295698	-0.219611	-0.669672	-0.764828	-0.272222	0.197718	0.292962	2.12761	0.173998	-0.285923	-0.357327
Scaf11		857		0.989755	0.301415	0.518476	-0.496083	-0.570039	0.291812	0.30671	0.375235	0.299846	0.208417	-1.06343
Scaf11		859		1	-0.0821445	0.0964237	0.366191	0.0123833	0.438883	-0.140853	0.0582232	-0.860588	0.14918	0.202231
Scaf11		716		0.504818	-1.36352	0.746064	0.0380272	-0.80602	0.846638	0.450886	-0.0984408	0.415698	0.132266	0.021477
Scaf11		704		0.0777606	-0.721463	0.82637	-0.613577	1.08434	1.46397	0.248378	-0.326253	-0.29541	-0.697378	-0.631351
Scaf11		410		1	-0.101016	-0.0878182	0.30411	-0.0666075	0.135933	-0.442383	-0.186297	0.411513	0.379025	-0.304977
Scaf11		609		0.724297	-0.552254	0.406543	0.497547	0.413501	0.46526	-0.954078	-0.159075	-0.758267	0.836514	0.106879
Herc1		1491		1	-0.118829	-0.37157	0.0104302	-0.244342	0.362796	0.0531428	0.49908	0.288312	0.206741	-0.560576
Herc1		1510		0.84731	0.0831437	-1.21574	0.540962	-0.0400871	0.94625	-0.30585	-0.599201	0.373675	0.483422	-0.348508
Tns1		1054		0.622098	-0.461244	-0.932587	0.700478	0.0181664	-0.103259	-0.0812242	1.27361	0.495509	0.34874	-1.02363
Tns1		1062		0.864518	0.162442	-0.500301	0.453123	0.139526	0.345371	1.16389	-1.42106	-0.358309	-0.0813065	-0.184095
Tns1		1363		0.787025	-0.657094	-0.365158	-1.19107	0.128457	0.57728	0.551895	-0.440896	0.772756	0.142944	0.125928
Tns1		1118		1	0.0149948	0.108568	0.262947	-0.598407	-0.436444	0.502199	0.523256	0.241149	0.105461	-0.609141
Tns1		1126		0.413788	-1.07185	-1.13342	-0.195511	-0.101755	-0.144625	-0.640654	0.715669	0.817469	0.840355	0.724851
Tns1		1468		1	-0.0221731	-0.438037	0.843848	-0.0287437	0.557088	0.456933	-0.916288	0.029972	-0.234407	-0.23654
Tns1		1451		1	-0.0093671	0.464618	0.564468	-0.262907	0.810376	-0.552727	0.0487376	0.371659	-0.50417	-0.458638
Tns1		1423		1	-0.348184	-0.0803586	0.988684	0.308617	-0.218884	0.253006	0.281881	-0.409449	-0.628254	0.095773
Tns1		1535		1	-0.745458	-1.17398	0.208557	-0.00281919	0.115995	0.183778	0.481378	0.336368	0.413759	0.0904135
Tns1		836		1	-0.0699399	-0.178322	0.632583	0.18312	0.770383	0.270715	0.322393	-0.462874	-0.373388	-0.70791
Tns1		636		1	-0.0608065	-0.788191	0.402697	0.292428	-0.609354	0.135855	0.543291	0.517112	0.273523	-0.819444
Tns1		792		1	-0.13401	-0.133912	0.41634	-0.0760291	0.172531	0.154527	0.761767	-0.137296	-0.491497	-0.228238
Tns1		1346		0.992594	-0.528641	0.159754	0.578979	0.205881	0.421175	0.308682	-1.28479	-0.0970281	-0.024259	0.229025
Tex264		234		1	0.0813168	0.309727	-0.29798	-0.486927	-0.278925	0.0862751	-0.491847	0.715327	0.102272	0.0710057
Tex264		302		0.764975	-0.320952	-0.254841	0.823658	-0.283651	-0.366861	-0.987573	0.869811	0.499174	0.385723	-0.0965456
Tex264		238		1	-0.0511889	-0.163588	0.255478	-0.440491	0.386458	0.615001	0.601268	0.0228497	-0.193405	-0.762477
Tex264		243		1	0.141307	0.324028	-0.953965	0.485955	0.246741	0.164749	0.577873	-0.648238	-0.453971	0.164191
Atad2b		80		0.911164	0.332682	-0.372948	-1.16599	-0.328485	0.202845	-0.0245653	-0.666506	0.719869	0.18433	0.618116
Atad2b		317		1	-0.864866	0.185027	-0.133793	0.162044	0.171027	0.500572	-0.220739	0.0591369	0.235378	-0.0934068
Atad2b		16		1	0.0850996	0.0687374	0.50963	-0.69182	0.423038	0.401156	-0.601649	-0.624065	0.315228	0.214585
Irf2bp2	Interferon regulatory factor 2-binding protein 2	250		1	-0.883398	-0.244079	0.198623	-0.393263	0.225522	0.498834	0.805937	0.522324	0.183959	-0.667957
Irf2bp2	Interferon regulatory factor 2-binding protein 2	389		1	-0.481414	-0.210989	-0.349591	-0.122953	0.378973	0.327488	0.667831	0.350576	0.190063	-0.628427
Irf2bp2	Interferon regulatory factor 2-binding protein 2	343		0.983469	0.273473	-0.328393	-1.13781	0.220154	-0.400251	-0.211417	-0.46064	0.744148	0.31504	0.403922
Irf2bp2	Interferon regulatory factor 2-binding protein 2	169		1	-0.83041	-0.0665268	0.575778	0.681641	0.306177	0.0185807	-1.02119	0.171053	0.341443	-0.22799
Irf2bp2	Interferon regulatory factor 2-binding protein 2	440		0.282391	0.726009	0.36677	-0.68761	0.874667	0.521408	0.775548	-0.666212	-0.711402	-0.627094	-0.688494
Irf2bp2	Interferon regulatory factor 2-binding protein 2	443		0.51285	-0.0682771	0.180083	-1.97464	0.324326	-0.585898	0.214365	0.361407	0.380761	0.356775	0.306338
Irf2bp2	Interferon regulatory factor 2-binding protein 2	226		0.984456	-0.351556	0.218112	-0.495328	-0.287969	0.534081	-0.221479	-0.127983	0.701616	0.726189	-0.663462
Irf2bp2	Interferon regulatory factor 2-binding protein 2	71		0.298907	-0.626341	-0.353589	-0.189704	-0.515558	-0.174106	-1.05373	1.37875	0.935694	0.771481	-0.00756023
BC018507		1820		1	0.0817344	0.289124	-0.209497	-0.0923808	-1.34862	0.306351	0.262437	0.110429	0.245448	0.103337
Gm15800		1530		0.984425	-0.291534	0.200545	-0.12616	-0.410019	-0.603932	0.237137	0.932658	0.287098	0.636821	-0.761836
Elmsan1		1083		1	0.425694	0.447258	-0.100366	0.361434	0.392827	-0.734216	0.341793	-0.355906	-0.134222	-0.373917
Elmsan1		34		0.515209	0.0718734	-0.242142	-0.144965	-0.165876	-0.571963	0.223066	1.91055	-0.609243	0.299307	-0.532736
Elmsan1		915		1	-0.343714	0.664252	-0.672826	-0.143697	0.0851945	-0.385118	0.183155	0.648725	-0.0959783	0.12495
Elmsan1		456		1	0.0866827	-0.94546	0.354965	0.115263	-0.589428	-0.283407	0.652253	0.714666	-0.393119	0.155668
Elmsan1		890		1	-0.0392707	-0.265593	-0.119101	0.12524	0.322213	0.314874	0.531608	0.266237	0.112999	-1.13192
Elmsan1		988		1	0.51709	-0.550141	0.702439	-0.3318	0.264883	0.333034	-0.7499	0.24759	-0.326639	-0.189735
Wdfy4		3088		0.978009	-0.010599	-0.0974057	-0.196225	-0.224279	-0.288692	-0.330983	1.55102	0.0361508	0.245202	-0.442013
Cep350		1812		1	0.243004	0.633052	-0.287436	-0.606363	0.630937	-0.369634	0.544829	-0.39083	0.437762	-0.454976
Cep350		2221		1	-0.294511	0.141271	0.0515737	-0.314565	0.104668	0.13585	-0.126189	-0.088343	0.523945	-0.0908689
Cep350		1798		1	-0.204705	0.133101	0.457051	-0.0584989	-0.177838	-0.213028	0.955696	-0.2536	0.246414	-0.542589
Cep350		2450		1	0.103187	-0.637984	0.621173	0.00422111	-0.306336	-0.558787	0.57694	0.771565	0.0405954	-0.551127
Cep350		1641		0.091507	-0.833977	1.63323	-0.124809	-0.777526	1.41514	-0.237623	-0.467967	0.141586	0.138524	-0.272677
C2cd2		649		1	0.0150013	-0.29553	0.459046	-0.375221	-0.116871	-0.122948	1.06756	-0.0469259	-0.367432	0.061869
Nup153		175		0.749536	0.592821	-0.783995	-0.867036	1.1273	0.0619017	-0.412998	-0.0932554	0.0270622	0.188902	-0.261296
Nup153		603		1	0.184189	-0.473108	0.124271	-0.635245	-0.0467563	0.982259	0.043385	0.269867	0.30858	-0.845494
Nup153		335		0.133026	-1.33969	-0.271414	-0.566764	-0.410174	-0.579743	-0.117314	0.695127	1.17603	0.88684	0.346408
Nup153		339		0.0669437	-0.73802	-1.09692	-0.239406	0.0351784	-0.152337	-0.00963039	2.16587	0.854812	-0.546455	-0.103789
Pi4ka		198		1	-0.344027	-0.2918	-0.322399	0.0105015	0.587592	-0.667527	0.414962	0.387403	0.343953	-0.0215695
Pi4ka		199		0.174863	-0.849317	-0.599918	-0.349336	-0.938252	0.209834	-0.462496	1.43325	0.92583	0.484643	0.319221
Pi4ka		207		1	-0.0481661	0.162697	0.761608	-0.0798569	-0.196569	0.565336	-0.263794	0.156895	-0.110577	-0.831587
Pi4ka		172		1	-0.0334887	-0.543476	0.623945	-0.310034	0.525959	0.236592	-0.136198	0.284443	-0.22758	-0.302603
Pi4ka		1378		0.770084	0.208591	-0.982984	0.65393	0.0914353	0.898283	0.473761	0.0388243	0.263556	-0.466583	-1.0268
AI607873		34		1	0.0262782	-0.558202	-0.250201	-0.251273	-0.542885	0.380401	-0.155541	0.533145	0.345488	0.096083
Cenpf		247		1	0.142645	0.334934	-0.239278	-0.0804069	0.150195	-0.0660986	-1.07612	0.150234	0.361263	0.115067
Nbas		472		1	0.0993723	-0.0245637	-0.332365	0.120256	0.500431	-0.0606261	0.0568801	0.249795	-0.446576	-0.112508
Zbtb21		463		1	-0.516047	-0.323608	-0.571622	-0.062773	0.259906	-0.120326	0.787916	0.881433	-0.223152	-0.0735781
Zbtb21		1031		1	-0.681495	-0.521598	0.134375	-0.0188303	0.582959	-0.443815	0.463401	-0.0232573	0.781143	-0.108097
Zbtb21		439		0.888083	-1.1931	-0.218718	0.229834	-0.646954	-0.247303	-0.270196	0.56903	0.565442	1.00213	0.293047
Zbtb21		450		0.396815	-1.33617	0.194461	0.494651	-0.153313	0.383042	0.420771	0.485336	0.642752	0.354404	-1.09656
Akap13		1910		1	0.0303201	0.0971068	0.488935	0.206015	0.534226	0.0186242	-0.0565321	0.0284053	-0.980905	-0.100263
Akap13		2681		1	-0.188191	-0.458367	0.358735	0.124082	-0.23374	0.567826	0.206089	-0.744103	0.112704	0.223145
Akap13		1631		1	-0.826847	0.231608	0.525619	0.0656033	0.415294	-0.265444	0.210721	0.16843	0.391932	-0.571106
Akap13		2480		1	-0.475348	0.440583	1.15549	-0.366566	-0.122569	0.280036	-0.382036	0.318606	-0.224702	-0.35063
Akap13		1587		1	-0.972307	-0.553359	0.209021	-0.450145	0.676173	0.172854	0.477208	0.11769	0.462816	0.0623096
Akap13		2710		1	-0.894001	-0.3273	-0.239075	-0.277402	0.277222	0.131342	0.424792	-0.296583	0.813227	0.421689
Akap13		1252		1	0.25986	-0.0822643	-0.58015	0.329377	-0.265888	0.530333	-0.0781242	0.0768578	-0.0708716	-0.370736
Akap13		1253		0.793774	-0.866061	-0.210938	-0.0873618	-0.392201	-0.861915	-0.20757	0.785544	0.838165	0.57236	0.336311
Ankrd11		2160		0.889759	-0.00200235	-1.06383	-0.500463	0.435634	-0.373251	0.418976	0.61607	0.677142	0.354377	-0.893019
Ankrd11		859		0.787775	0.66182	0.615084	0.169444	-0.225247	0.796932	-0.24892	0.578209	-0.638614	-0.21745	-0.951341
Ankrd11		526		1	-0.335532	0.18124	0.293208	0.121191	0.651289	0.404791	-0.356926	0.654558	-0.488131	-0.933485
Ankrd11		1820		1	-0.0131061	0.74765	0.225874	0.105252	-0.940848	-0.0789075	0.413497	0.364926	-0.0874784	-0.625315
Ankrd11		1798		0.844074	-0.172215	0.0247304	0.460159	-0.502617	0.870702	0.355091	0.282956	0.419077	0.132907	-1.46115
Ankrd11		1644		1	-0.899093	0.16593	0.449942	-0.444631	-0.0495323	-0.0924698	1.05722	-0.191469	0.0897169	0.320277
Kif13b		1654		1	0.146715	-0.409075	0.679587	-0.511795	-0.417192	-0.21562	0.81684	0.0555611	-0.185644	0.208163
Kif13b		1390		1	0.455174	-0.379782	0.665677	-0.0831935	-0.211516	-0.0318571	-0.368386	-0.0659937	-0.511418	0.457793
Kif13b		1399		1	-0.757407	-0.410236	0.166068	-0.393397	0.486876	-0.086028	0.425177	-0.14036	0.6334	0.24288
Kif13b		1794		1	-0.89744	-0.741361	-0.131177	-0.16107	0.503533	0.511057	0.924134	0.00839716	0.170203	-0.0474954
Kif13b		1795		0.990087	-0.191648	-0.118629	0.166835	-0.870563	0.463773	0.467293	0.660545	-0.798291	0.307831	0.205984
Kif13b		1812		0.910352	-0.390473	-0.0319086	-0.103918	0.396883	0.202469	0.162899	-0.19518	0.425492	0.845851	-1.34425
Kif13b		1814		0.993448	-0.286508	-1.23088	0.407902	-0.153243	0.65233	0.0463991	0.517762	-0.567481	0.520279	0.18022
Kif13b		1380		1	0.125111	0.125362	0.837265	0.190815	0.21499	-0.0937529	0.183685	0.0154132	-1.09943	-0.159129
Kif13b		1381		0.968225	-0.719045	-0.909621	0.0925877	0.180083	0.600739	-0.492824	0.00699516	0.792326	0.102673	0.293763
Arid1b		1550		0.931287	0.245611	-1.20407	-0.817208	-0.384648	0.272027	0.608605	0.358703	0.510769	0.170651	-0.10808
Arid1b		1756		0.589283	-0.801061	-0.0451509	0.0883434	-1.3564	0.263871	0.533601	0.69829	0.539359	0.401201	-0.0707196
Arid1b		1757		0.606532	-0.840657	-0.041205	0.0908346	-1.31747	0.26445	0.53124	0.694135	0.536936	0.400283	-0.0664951
Rsf1		608		0.754727	-0.162647	-0.0829618	0.372576	-0.811531	-1.46365	0.181053	0.595742	0.678682	0.633063	-0.0848978
Rsf1		401		1	0.184472	0.00226613	0.00796817	0.266463	0.100592	0.311938	-0.706011	0.176288	0.0194984	-0.512272
Rsf1		1286		0.64555	1.02904	0.264096	0.0910036	-0.462494	0.931981	0.473872	-0.866165	-0.401211	-0.35413	-0.600763
Rsf1		668		1	0.130327	-0.0858629	0.165095	-0.358174	-0.00863671	0.7093	-1.24497	0.528083	0.272745	-0.401498
Rsf1		1347		1	-0.912571	-0.286028	-0.0836937	0.3852	0.118079	0.425894	0.738654	0.525769	-0.204167	-0.585384
Rsf1		350		0.715881	0.114207	-0.552036	0.287053	0.101726	-0.324758	0.212242	1.7996	-0.144939	-0.30594	-0.884693
Rsf1		232		1	-0.798193	0.124748	0.302364	0.276967	-0.146043	-0.112322	0.292483	-0.0138082	0.519452	-0.30226
Trip11		1888		1	0.179245	0.0892046	0.427501	0.700109	-0.626376	0.0405287	-0.616546	0.231989	-0.398196	-0.209014
Trip11		1961		1	-0.0673437	0.298654	0.324807	-0.272764	-0.172837	-0.460019	0.167034	-0.268634	0.647758	-0.0422413
Trip11		1839		0.492164	0.675931	0.751594	0.359446	0.761856	-0.8407	-0.252174	-0.999151	-0.315577	-0.699424	0.375995
Rnf213	E3 ubiquitin-protein ligase RNF213	2233		1	0.46389	0.776181	-0.314488	-0.656908	-0.056217	0.0601941	-0.235877	-0.130826	-0.0745902	0.211042
Rnf213	E3 ubiquitin-protein ligase RNF213	274		0.81471	-0.935133	-0.519624	-0.549413	-0.334118	-0.077811	-0.190043	0.910436	0.89954	0.641865	0.095198
Rnf213	E3 ubiquitin-protein ligase RNF213	298		1	-0.503625	-0.338572	-0.211556	0.0723102	-0.24275	0.391699	0.99419	0.324742	0.039504	-0.475613
Rnf213	E3 ubiquitin-protein ligase RNF213	4509		1	0.230745	0.652204	-0.36309	-0.514386	-0.19099	-0.160927	0.224592	-0.165721	0.0755418	0.292711
Nolc1		563		1	-0.0918603	-0.011426	-0.246182	0.0286088	0.0251566	-0.174599	0.0332119	0.826598	0.0569872	-0.496305
Nolc1		701		1	0.191891	0.156923	0.104461	-0.156111	0.172451	-0.951608	0.309312	0.0816547	0.181197	0.0956168
Nolc1		646		1	-0.0447307	0.0923775	-0.269896	-0.0175016	0.0276927	0.0433751	-0.392005	0.00429104	0.444209	-0.0232692
Setd2		294		0.980918	-1.0217	0.208327	0.203751	0.0738848	0.134224	-0.36154	-0.303098	0.916647	0.446646	-0.236336
Setd2		753		0.996377	-0.504023	0.222504	0.195072	-0.471963	-0.139536	0.270537	0.620193	0.929984	-0.355783	-0.542428
Setd2		633		1	-0.112712	0.010598	0.544534	0.319287	0.180156	0.526918	-0.848471	0.0184629	0.222055	-0.889123
Setd2		1926		1	-0.446161	0.0494041	-0.11595	-0.236739	0.42065	-0.0387335	0.295559	0.83357	0.303807	-0.902991
Setd2		246		1	-0.66462	-0.182358	-0.493202	0.0671213	1.06713	0.149831	-0.0520856	0.312862	-0.129555	0.00974635
Setd2		614		0.436887	-0.730635	-1.81995	-0.40642	0.117863	0.428407	0.512601	0.682106	0.416026	0.367584	0.15345
Ythdc1		146		1	0.683711	0.525365	-0.0367254	-0.861514	-0.139258	0.542977	-0.12104	-0.0128991	-0.103301	-0.420231
Ythdc1		309		1	-0.407146	-0.406831	-0.0970938	-0.699258	0.450039	0.215943	0.0867486	0.784679	0.220266	-0.139131
Zfp395		444		0.960165	-0.739893	0.134704	0.324267	-0.46785	-0.492678	0.619622	0.921172	0.440211	0.067325	-0.585015
Ahnak		780		1	-0.141068	0.0139415	-0.0648184	-0.134428	1.13648	0.0151339	-0.767411	0.202334	0.308198	-0.488816
Ahnak		1283		1	0.363674	0.210279	0.107721	0.428548	0.443493	-0.520648	-0.370454	0.141713	0.312073	-1.01864
Ahnak		4890		0.745866	-0.963143	-0.9988	-0.441149	0.0817407	0.24135	-0.28734	1.25285	0.710431	0.466578	-0.0489574
Ahnak		4966		0.74955	-0.332004	-1.18935	-0.247662	0.419799	0.309874	-0.299128	0.614449	0.96647	0.187279	-0.557897
Ahnak		4968		1	-0.39111	-0.0240782	0.686148	-0.932217	0.54168	-0.298704	-0.0254394	0.242101	-0.005061	0.501258
Ahnak		4975		1	-0.199939	0.208458	0.258406	-0.118406	0.141679	0.561619	0.106566	0.227782	-0.097572	-0.909817
Ahnak		5522		0.836495	-0.223451	0.0747705	0.167266	-1.08588	-0.743672	0.526713	0.622531	0.610061	0.466916	-0.385027
Ahnak		5525		0.742646	-0.888578	-0.68974	0.253707	-0.0509101	0.335788	0.803361	0.291857	0.760894	0.318124	-1.0866
Ahnak		5535		1	0.293667	0.218037	0.191161	-0.270473	0.232495	0.111102	0.135569	0.0495827	-0.670842	-0.0959819
Ahnak		5536		0.981592	-0.67077	-0.313264	-0.563689	-0.636608	-0.195859	-0.0529993	-0.0826664	0.556989	0.919587	0.75041
Ahnak		42		1	-0.0321801	0.420324	0.247818	0.190005	0.413761	0.139535	-0.314699	-0.112196	-0.589553	-0.171013
Ahnak		5563		0.885532	0.0463457	0.28095	-0.368642	-0.0599824	0.940356	-0.336312	-0.0358106	0.655747	0.20898	-1.12742
Ahnak		5596		0.790407	-1.01742	-0.901808	-0.367774	-0.393006	0.538381	0.0626736	0.218373	0.43847	0.354714	0.939192
Ahnak		4648		1	-0.848697	-0.756067	-0.357797	0.229703	0.706125	0.157153	-0.0180726	0.681171	0.231378	-0.131348
Ahnak		5099		0.87189	0.305646	0.209242	0.525346	0.472124	0.445386	0.0482351	0.0734869	-1.42734	-0.180655	-0.158105
Ahnak		5101		0.662925	-0.578906	-0.634603	-0.273812	-0.147501	0.28233	-0.340704	-0.508265	0.804611	-0.143591	1.25685
Ahnak		1339		0.860209	-1.03375	-0.801784	0.529276	0.381709	0.892137	0.0564104	0.714655	-0.190353	0.156004	-0.370739
Ahnak		5414		0.895923	-0.141704	0.434636	0.122961	-0.840249	0.709138	-0.413107	-1.02355	0.328253	0.526602	0.357815
Ahnak		5504		0.691076	0.143157	0.0711322	-1.95153	0.043402	0.238942	0.278904	-0.0151455	0.217182	0.347156	0.212647
Ahnak		5512		0.830757	-0.0825244	-0.198645	0.661527	0.649141	0.689791	-0.518173	-0.197079	-1.01989	-0.0713757	0.326129
Ahnak		5607		1	-0.0622404	0.22324	0.334676	0.408658	0.344015	0.214303	-1.12584	-0.75875	0.221056	0.144904
Ahnak		5228		0.787157	-0.444316	0.11165	-0.700243	-1.15174	-0.322077	0.543427	0.506986	0.534715	0.511354	0.309328
Ahnak		5377		0.715468	-0.934605	0.213314	-0.337982	-0.814656	0.423235	0.142207	-0.501871	1.06358	0.579443	0.116508
Ahnak		5378		1	-0.849768	-0.294609	0.0353228	0.189234	0.405286	0.0539176	-0.155602	0.318093	0.263342	0.0323834
Ahnak		5325		0.0546806	-0.360303	-0.352303	-0.125193	-0.202787	-1.35692	-0.280277	2.24407	0.0646222	0.495813	-0.0243116
Ahnak		5333		0.87754	-0.503483	-0.629359	-0.883	-0.600281	0.636041	0.102657	0.470035	0.054683	0.569281	0.681856
Ahnak		2985		0.589178	-0.295124	-0.646002	-0.46262	-0.783364	-0.107251	-0.10895	1.67329	0.139555	0.842777	-0.137955
Ahnak		5303		1	-0.345049	-0.392413	0.389157	-0.826469	0.5551	-0.0270311	0.32171	0.473769	0.334826	-0.265211
Ahnak		545		0.802966	-0.97135	-0.0104177	0.0943815	-0.25465	0.670541	0.605778	-1.05263	-0.346934	0.340032	0.850717
Ahnak		5553		0.741153	0.23208	0.170422	-0.748474	0.169226	0.122941	0.393403	0.196741	-1.429	0.439102	0.388967
Ahnak		5555		1	-0.208491	-0.320435	0.468458	0.530049	0.29182	0.504394	-0.0464962	0.257675	-0.454659	-0.923978
Ahnak		576		1	-0.0374651	-0.357218	-0.0577839	-0.424571	0.847458	0.173372	-0.0713937	-0.188412	0.325184	-0.118904
Ahnak		2438		0.607375	-1.11636	-0.323579	-0.469101	-0.880647	0.615245	0.590077	0.295302	0.549823	0.713643	0.0550589
Ahnak		2566		0.910083	-0.689413	-0.889445	0.23066	-0.532395	0.63169	0.68424	0.492344	0.0270151	-0.257299	0.418915
Ahnak		1321		1	-0.517374	-0.561962	0.361431	-0.82965	0.601807	0.34374	-0.528427	0.268835	0.604543	0.22527
Ahnak		2948		0.808325	-0.753726	-0.613906	0.220069	-0.359818	0.843427	0.629283	0.599952	0.240658	-1.03981	0.49626
Ahnak		818		0.909269	-0.798245	-0.36885	0.827796	-0.909762	0.998772	0.1236	0.388222	0.142903	-0.232755	0.289804
Ahnak		565		0.982552	-0.267417	0.645081	-0.12402	-0.687209	-0.424283	-0.223538	0.928882	0.38919	-0.303677	0.323405
Ahnak		5393		1	-0.692186	-0.0673643	0.327436	-0.543438	0.590524	0.257121	0.366704	0.257569	-0.0783356	-0.113706
Ahnak		1169		0.420699	-0.857207	-0.433883	0.0688046	-0.519977	-0.559251	-0.472825	1.03736	0.708598	1.03124	0.0253999
Ahnak		5059		0.903815	-0.91872	-0.535167	-0.339176	-0.503676	-0.0684846	0.611368	0.446652	0.746446	0.0632339	0.37348
Ahnak		5198		1	-0.00585807	-0.228044	0.357721	0.236311	0.159427	-0.290794	-0.162224	0.463686	-0.240653	-0.257852
Ahnak		211		0.636834	-0.311551	-0.281812	0.271157	-0.476761	-0.202287	0.333136	1.9705	0.217746	-0.297922	-0.782816
Ahnak		213		0.872315	0.203278	0.126642	-0.965972	0.220475	0.394373	0.321595	-1.1124	-0.499513	0.457651	0.464533
Ahnak		217		0.757269	-0.228128	-0.214012	0.0973752	-1.46422	0.0357765	0.048931	0.698091	0.473525	0.35577	0.351202
Ahnak		5617		1	-0.0465018	-0.194576	-0.0393544	0.158819	-0.452292	-0.426676	-0.0409742	0.00275779	0.0899182	0.76708
Ahnak		5620		1	0.456511	-0.485694	0.344669	-0.332081	-0.247341	0.529476	0.0938483	0.513659	-0.360274	-0.586403
Ahnak		5623		0.773333	0.157336	0.230735	-1.38676	0.435009	0.581407	0.404883	-0.58474	-0.727469	0.294703	0.305056
Ahnak		136		0.899801	-0.0610249	-0.990065	-0.597859	0.245179	0.334727	-0.730364	1.04505	0.0232511	0.428211	0.250855
Ahnak		5287		0.996213	0.0766187	-1.49387	-0.554784	-0.0068999	0.826487	0.110901	0.110553	0.0665355	0.293871	0.292686
Ahnak		5629		0.977983	-0.230231	0.591375	0.662789	0.40324	-0.499712	0.621786	0.0880584	-0.711368	-0.474278	-0.241031
Ahnak		5631		1	-0.63418	0.254436	-0.604459	0.470807	0.362443	0.604701	0.33626	-0.217377	-0.148355	-0.337105
Ahnak		5632		1	-0.451653	0.479573	-0.404394	-0.192502	-0.274294	0.0124986	0.17906	0.274905	0.0464189	0.325374
Ahnak		5633		1	0.600326	0.209474	-0.188283	0.210283	-0.151871	-0.426771	-0.213263	0.277769	-0.315572	-0.0880781
Ahnak		5049		1	-0.29806	-0.0438389	0.863893	-0.202161	-0.343481	-0.0795704	0.217284	-0.222276	0.529204	-0.24753
Ahnak		3139		1	0.244316	0.0150693	0.717002	0.0403171	0.358517	-0.589726	0.767372	-0.0430611	-0.495197	-0.550119
Ahnak		4686		0.128709	-1.23035	-0.111598	-0.430232	-0.576557	-0.256898	-0.545264	1.7605	0.351793	0.638165	0.640888
Ahnak		1714		0.688795	-1.2846	0.336823	1.05501	-0.666332	0.234644	-0.283533	0.698184	0.311883	0.558761	-0.379674
Ahnak		116		1	-0.32766	-0.00815487	0.218541	0.020614	0.264672	0.0364926	0.749481	-1.04005	0.469093	-0.076889
Ahnak		4298		0.999502	-0.0461191	-0.678893	0.517738	-0.140556	0.23474	0.751733	0.446434	0.222187	-0.202887	-0.974371
Ahnak		4300		0.440524	-0.699529	-0.674983	1.08097	0.40828	0.903777	-0.454284	0.797236	-0.675639	0.372378	-0.531461
Ahnak		4789		1	0.0632194	-0.105068	0.0265383	0.134107	0.948136	0.113668	0.331116	-0.298604	-0.39645	-0.516482
Ahnak		3744		0.985676	-0.0677685	-0.0587233	0.736828	-0.0213176	1.05211	0.490237	-0.335088	-0.357078	-0.267087	-0.82333
Ahnak		4740		0.185337	0.0169974	-0.184603	-0.916779	0.606413	-0.124047	-0.81481	1.49262	0.64906	-0.787275	0.129224
Ahnak		4905		1	0.326398	0.165384	-0.368714	-0.288364	0.171898	-0.752604	0.469108	0.0753422	-0.456829	0.7678
Ahnak		4906		1	-0.0381529	0.524056	-0.0813531	0.51712	-0.00198736	-0.304994	0.95952	-0.438816	-0.252068	-0.533266
Srsf11		462		1	-0.42331	-0.588467	0.439248	0.544353	0.477179	-0.298308	-0.380318	-0.478256	0.555466	0.139323
Srsf11		235		0.716079	-0.225748	-0.188188	0.380381	-0.32121	-0.0830003	0.341523	1.79143	0.192667	-0.828054	-0.584645
Srsf11		477		1	-0.609942	0.00826705	0.152444	-0.34437	0.150724	0.0200445	-0.0281213	0.53957	0.530462	-0.34825
Srsf11		2		1	0.494668	-0.214021	0.366992	-0.191306	-0.71763	-0.284414	0.692484	-0.136442	0.217484	-0.195858
Srsf11		3		1	0.207805	-0.601857	-0.669781	-0.526775	-0.0615122	0.0993827	0.73673	0.265508	0.747035	-0.34564
Bod1l		262		0.815155	-1.24602	0.441957	0.0668085	-0.0729191	0.446083	-0.74065	0.430123	0.0091711	0.796073	0.215619
Bod1l		2751		0.802906	-0.548972	-0.141065	0.816678	0.390306	-1.19666	0.325064	1.10742	0.263745	-0.118678	-0.751242
Bod1l		236		0.753977	-0.907954	-0.369991	-0.133844	-0.0149355	-0.611739	-0.405093	1.05327	0.689744	0.607695	0.0772697
Bod1l		237		1	-0.0653197	0.350688	-0.249758	-0.460335	0.0591037	-0.595804	1.03306	-0.325532	0.44787	0.104299
Bod1l		632		1	0.307116	0.2512	-0.517305	-0.124178	-0.657949	-0.506375	0.722483	-0.361212	0.522072	0.313754
Bod1l		637		1	-0.448349	-0.642804	0.163632	0.185228	-0.262876	0.253834	0.857809	-0.368152	0.692446	-0.401827
Bod1l		795		1	0.288212	0.374362	0.453594	0.186309	0.38849	0.173021	0.696715	-0.968073	-0.277596	-0.836744
Bod1l		2841		0.991572	0.451432	-0.421598	-0.30208	-0.0624806	-0.31912	0.569678	0.377242	0.646771	-0.310657	-0.795576
Bod1l		2777		1	-0.173662	0.361642	-0.00653239	0.519879	-0.513484	-0.0109199	0.303163	0.0748962	0.0492724	-0.568057
Ttc7b		630		0.950913	-0.755551	-0.188133	0.0561458	0.597252	-0.355013	-0.867939	0.39466	0.167724	0.668209	0.25956
Ttc7b		160		1	-0.295248	-0.731794	0.628361	-0.0097369	0.642473	-0.664777	-0.291943	0.207368	0.368351	0.20872
Ttc7b		678		0.815415	-0.113383	-1.79328	0.391091	-0.0206714	0.0100814	-0.113445	0.936157	0.0283052	0.298058	0.263101
Ttc7b		681		0.928626	-0.303973	-1.49105	0.29447	-0.57565	0.240241	0.746872	0.235646	0.420143	0.166618	0.0865141
Utrn		933		1	-0.576109	-0.291382	-0.274035	-0.151635	0.0649776	0.864725	1.07946	0.340352	-0.0657448	-0.845855
Akap11		21		1	-0.298791	0.182438	0.0393592	-0.857738	0.483983	0.318733	0.10315	0.111326	0.234275	-0.114503
Akap11		1163		0.967859	-0.822404	-0.166923	-0.894101	0.363575	0.092295	0.0528214	0.939437	0.354379	0.379563	-0.305966
Akap11		133		1	-0.565832	-0.479517	0.478394	-0.0884292	-0.00820335	0.0203668	0.763931	0.48947	0.393387	-0.814916
Zc3h13		242		1	0.064858	0.124617	-1.41305	0.2759	0.280342	0.387073	0.113973	0.0155251	-0.0350097	-0.0377623
Zc3h13		1499		1	-0.324828	-0.439966	0.172313	-0.325994	-0.796001	-0.0300864	1.16305	0.42137	0.278176	-0.0931878
Zc3h13		1484		1	0.441477	0.241942	-0.170745	0.265993	0.441976	-0.206782	0.123601	-0.297276	-0.0130926	-0.667899
Zc3h13		703		1	-0.0791905	-0.0713611	0.346214	0.224254	0.0431877	0.179019	0.150757	0.381658	0.21732	-1.27466
Zc3h13		704		0.608107	0.143275	0.148764	0.441545	0.356033	0.22908	0.324317	0.304501	-0.389031	0.351171	-1.62868
Zc3h13		198		1	0.0652699	-0.0186168	0.221854	0.286443	-1.12638	-0.64466	0.202673	0.429829	0.345814	0.057655
Zc3h13		64		1	-0.216466	0.326192	0.0712816	0.158172	-0.0428932	0.0720577	-0.138525	0.29	-0.053188	-0.412617
Zc3h13		1069		1	0.0551316	-0.202481	0.598023	-0.0311956	-0.850465	0.679729	-0.872158	0.291956	0.119753	-0.120063
Zc3h13		265		1	0.162415	-0.16916	-0.394196	-0.238766	0.510497	0.149008	-0.832465	-0.33142	1.07697	-0.154215
Zc3h13		1273		1	-0.61903	0.213634	-0.513934	-0.765763	0.373625	-0.0281126	0.371006	0.387582	0.268212	0.423863
Zc3h13		207		0.653754	0.860753	-1.24018	-0.489021	-0.491267	0.554259	0.0176849	-0.0401727	0.563167	-0.519773	0.48077
Zc3h13		907		1	-0.199143	-0.044379	-0.492897	0.30527	0.418958	-0.0634373	-0.072411	0.1737	0.122885	-0.196227
Zc3h13		109		0.997775	-0.174712	0.450819	-1.06236	0.330565	-0.264615	-0.152974	-0.33747	0.723707	-0.24083	0.424461
Zc3h13		110		1	0.368689	0.536687	-0.448662	-0.0243658	-0.980335	0.108625	0.397957	-0.236241	0.0215012	0.132555
Zc3h13		1256		1	0.540988	-1.02782	0.113878	-0.472726	0.0294647	-0.336189	0.534019	-0.0639613	0.461828	0.132905
Zc3h13		1305		0.851567	-0.330758	-0.949091	0.0186654	0.0456226	0.658979	-0.61434	1.4649	0.130687	-0.339989	0.213689
Zc3h13		953		1	-0.441125	-0.17692	-0.584082	-0.0386374	0.302201	0.370797	0.10854	0.670068	-0.0192835	-0.279124
Zc3h13		77		1	0.38474	-0.65734	0.369438	0.326233	0.398753	-0.358704	-0.471925	-0.240888	0.451261	-0.291836
Zc3h13		1295		0.977654	0.482401	-0.202233	-0.715765	0.737006	-0.235699	0.0733058	-0.687953	-0.314052	-0.310514	0.71309
Zc3h13		1297		1	0.336274	0.157598	-0.57932	0.874379	0.0418642	-0.0400752	-0.466043	-0.0530863	-0.295149	-0.187917
Arid2		1385		1	0.133017	-0.442129	-0.322317	0.0953285	0.038227	-0.59615	1.13525	-0.219095	0.0548157	0.225313
Rnf169	E3 ubiquitin-protein ligase RNF169	630		1	-1.07542	-0.0112637	0.549889	0.208147	0.281841	0.345889	0.448148	-0.133949	-0.23893	-0.0571959
Rnf169	E3 ubiquitin-protein ligase RNF169	631		1	-0.91771	-0.0760913	0.629082	0.199631	0.292239	-0.0361516	0.501228	0.0327392	-0.154541	-0.133812
Rnf169	E3 ubiquitin-protein ligase RNF169	355		1	-0.264792	-0.226801	-0.759592	-0.170539	0.213715	0.450806	0.862493	0.297741	-0.676249	0.295672
Numa1		1835		0.8961	-0.0330248	-0.0448906	-0.455776	0.289493	1.34051	0.308391	-0.53876	0.0220468	0.0824385	-0.895155
Numa1		1292		1	-0.683759	0.305975	-0.174819	-0.166571	0.128128	0.376578	0.649266	-0.190431	0.560101	-0.577331
Numa1		1844		0.230294	0.0671376	0.192197	-1.33389	-0.135807	-0.469728	-0.0261321	1.97974	0.105914	0.147874	-0.435225
Numa1		398		0.564732	-0.315124	-0.269528	-0.0269785	-1.367	-0.191485	0.0671606	0.914706	0.822103	0.570407	-0.0975786
Numa1		270		0.946983	0.0310944	0.694347	0.074935	0.277683	0.458587	0.739766	0.0348568	-0.46897	-0.585129	-0.94149
Numa1		1951		1	0.0204944	0.548467	0.00299085	-0.181694	0.45802	0.263313	-0.864974	0.0994848	0.262268	-0.572246
Numa1		1739		1	-1.11574	-0.0750991	0.194212	0.0190371	0.0383994	0.275676	0.825186	-0.2463	0.41712	-0.0868158
Numa1		167		1	0.183637	-0.429263	0.373879	-0.249069	-0.500509	-0.0994243	0.557743	-0.034068	0.177903	0.0196353
Tsc22d2		587		1	0.0501646	0.192026	0.897587	0.226421	0.152717	-0.339364	0.46636	0.101975	-0.836016	-0.484698
Nav2		290		1	-0.860925	0.0572256	-0.584657	-0.0675883	0.317074	0.0397103	0.31225	0.0872207	0.0153174	0.709845
Dnajc21		283		1	-0.321128	-0.279625	0.223433	0.157619	0.765144	0.0418413	0.527096	0.20653	-0.194098	-0.817801
Fry	Protein furry homolog	1936		1	-0.0565108	0.461519	0.479653	0.000164017	1.04195	0.309693	-0.799308	-0.289418	-0.627687	-0.224104
Fry	Protein furry homolog	2495		1	-0.428843	-0.180851	0.49655	0.38409	0.607938	0.2048	0.293225	-0.634155	-0.0159067	-0.422632
Fry	Protein furry homolog	1940		1	-0.217122	-0.98617	0.120487	0.343769	-0.233437	0.00849099	0.887809	-0.279687	0.274581	0.0284503
Fry	Protein furry homolog	1955		1	-0.559635	-0.0738677	0.280917	0.108761	-0.0856627	0.426089	-0.947747	0.423204	-0.0626847	0.284037
Olfr432;Olfr433		137;137		1	0.148381	0.387304	0.497278	0.234048	0.324497	0.350966	-0.935319	-0.740082	-0.0881591	-0.110473
Dennd4a		1036		0.832953	-0.842638	-0.578534	0.0325268	0.436195	0.152173	-0.69815	0.209722	0.837326	0.762356	-0.357006
Rap1gds1		597		0.054593	-0.680012	-0.828999	-0.272235	-0.526156	-0.348321	-0.627617	1.85105	1.16615	0.366351	0.000162873
Smim13	Small integral membrane protein 13	59		0.98962	0.550389	0.042585	-0.571021	-0.0259663	-0.773262	0.390985	0.817315	0.325905	-0.703759	-0.174265
Kidins220		1544		1	0.250551	0.217586	0.200064	-0.0868202	0.778386	-0.0596441	-0.489679	-0.0532778	-0.187355	-0.393222
Kidins220		1549		0.695746	-0.0284409	0.0435936	0.352831	-0.20985	-0.284652	-1.0295	1.2637	-0.0592534	0.742867	-0.447431
Kidins220		918		1	0.00700035	-0.534802	0.0611806	-0.0802278	0.521272	0.268371	0.817905	-0.293074	-0.29765	-0.253587
Kidins220		1704		1	-0.419076	-0.622503	0.300123	0.0843658	0.418776	0.430723	0.514458	-0.370207	-0.466949	0.283003
Pwwp2b		210		0.602883	-1.23942	-0.120507	0.142919	0.0273893	-0.970217	-0.206586	0.801456	0.589684	0.622199	0.316498
Pwwp2b		190		0.0662087	-0.883543	-0.689743	-0.329202	-0.560044	-0.330468	-0.713412	1.86061	0.857665	0.544371	0.371568
R3hdm1		381		1	0.128003	0.258233	-0.269765	0.292638	-0.148476	0.179377	-0.393434	0.334951	-0.468684	-0.051203
R3hdm1;R3hdm2	R3H domain-containing protein 2	142;143		0.936513	0.22901	0.111957	0.111061	0.24691	0.690293	-1.19854	0.59773	0.117034	0.0940104	-0.6217
R3hdm1		111		1	0.169415	-0.362497	0.485322	-0.107071	1.09702	0.262035	-0.725647	0.133595	-0.502803	-0.32582
R3hdm1		187		1	0.380159	0.304834	-0.113169	0.026626	-0.426621	0.380147	-0.132115	0.0782921	-0.132703	-0.457218
R3hdm1;R3hdm2;Arpp21	R3H domain-containing protein 2;cAMP-regulated phosphoprotein 21	282;283;278		1	-0.27969	-0.171106	0.12222	0.513591	0.263467	-0.0786784	0.233318	-0.963943	0.249573	0.223223
Btaf1		223		0.973613	-0.408096	0.21917	-0.895669	-0.320116	0.256138	-0.00713799	1.36588	-0.075984	0.119114	-0.0169161
Zfp747;Zfp764;9130019O22Rik		122;122;122		1	-0.423992	0.158552	0.23104	-0.352049	-0.0178005	-0.250477	0.573343	0.0953825	0.253299	-0.0310143
Taf4a		501		0.331923	-1.24407	-0.0667428	-0.159395	-0.527817	-0.128455	-0.249484	1.15227	1.06272	0.475976	-0.115591
Rpl15;Gm10020	60S ribosomal protein L15;Ribosomal protein L15	97;97		1	0.248706	0.481404	-0.249031	0.528514	0.53669	-0.248619	-0.855883	-0.258583	0.426366	-0.63127
Raph1		192		0.973986	-1.35884	-0.282778	0.039997	0.218376	0.361012	0.214438	-0.126164	0.340286	0.521736	0.0699585
Raph1		899		1	-0.283848	-0.17644	-0.0313999	-0.0681543	0.284647	0.0833626	0.67086	-0.945397	0.581162	0.0721242
Raph1		218		1	0.397872	-0.12831	0.61264	0.0884648	0.131041	-0.594404	-0.0518925	-0.214169	-0.164532	0.0641601
Plekhg1		1362		1	-0.148676	-0.296122	0.315674	-0.673051	0.782141	0.0274869	0.0969126	0.17295	-0.799453	0.74679
Rpl18a;Gm17541	60S ribosomal protein L18a	123;120		1	0.0496626	0.177484	1.11496	-0.0463488	0.555252	-0.193576	-0.34135	-0.0855673	-0.31399	-0.539938
Rps2;Gm6576;Gm5786;Gm18025;Gm8225	40S ribosomal protein S2	77;59;77;56;77		1	-0.812309	0.0397258	1.21053	0.104481	-0.0833471	-0.134288	-0.55781	0.134344	0.00418101	0.246771
Rps2;Gm6576;Gm5786;Gm8225	40S ribosomal protein S2	264;246;264;263		0.835873	-0.593015	-1.46635	0.248391	-0.0636279	0.0667995	-0.0533118	-0.318985	0.994671	0.48098	0.33691
Rps2;Gm6576;Gm5786;Gm18025;Gm8225	40S ribosomal protein S2	281;263;281;260;280		1	-0.0172687	-0.243082	-0.351351	-0.209978	0.370002	-0.559771	0.21558	-0.0926676	0.637509	0.248814
Tpr	Nucleoprotein TPR	2105		1	0.0703795	-0.650959	0.51029	-0.272382	0.000155481	0.430621	0.355089	0.551949	-0.388616	-0.552882
Tpr	Nucleoprotein TPR	2141		0.656374	0.347485	0.355893	-0.74952	0.415515	-0.68623	0.376035	0.477242	-1.24251	0.270322	0.285111
Tpr	Nucleoprotein TPR	453		0.981857	0.404003	0.35986	0.809082	0.368484	-0.265009	0.549946	-0.38433	-0.617589	-0.388065	-0.706481
Tpr	Nucleoprotein TPR	706		1	0.223724	0.15872	-0.428551	-1.16381	0.782353	0.214262	0.143454	0.00858921	0.0152183	0.210032
Tpr	Nucleoprotein TPR	2223		1	0.554331	0.461865	1.11733	-0.234857	0.152352	0.327925	-0.633823	-0.300639	-0.663431	-0.506621
Ankrd50		1279		1	0.336297	-0.395583	0.407806	0.0574044	0.106919	0.0999877	0.0995621	0.0571064	-0.166612	-0.548211
Ankrd50		1100		1	-0.0231844	-1.28097	0.521846	0.137907	0.0604081	-0.111762	0.864486	-0.091863	0.233694	-0.269115
Morc3		521		1	0.427025	-0.395149	-0.549724	-0.0271757	0.0631151	0.411297	0.479034	0.389159	-0.558447	-0.339817
Morc3		505		1	0.358808	-0.152839	-0.425491	-0.137823	-0.489423	0.456708	0.830081	0.0410203	-0.244196	-0.296264
Morc3		563		0.836436	-0.407838	-0.394925	-0.340699	-0.144395	-0.158522	-0.288796	1.23006	-0.0331529	1.18607	-0.563823
Morc3		621		0.869991	-0.402445	0.00998817	0.866204	0.72855	-0.87478	0.47069	-0.0723906	-0.0373834	-0.00149485	-0.704683
Morc3		622		1	-0.0580458	0.293232	0.156404	-0.967984	-0.239756	0.589581	-0.1998	0.61683	-0.00388598	-0.184055
Zc3h7b		676		1	0.430559	-0.311084	0.128081	-0.508677	-0.7403	0.215248	0.284947	0.181607	0.262524	-0.102493
Zc3h7b		677		1	0.420428	0.209772	0.0742921	-0.48242	-0.919426	0.174041	0.2538	0.135544	0.22814	-0.189561
Arid4a		427		0.978019	-0.656574	-0.137929	0.0129784	0.575835	0.560016	0.5193	0.580809	-0.212098	0.00595967	-0.994329
Arid4a		867		1	0.284545	-0.34752	0.403893	-0.269856	0.401085	0.311625	-0.451992	-0.353651	-0.271324	0.294563
Arid4a		545		1	-0.181211	0.59586	0.400904	-0.209692	-0.150536	0.384364	-0.316576	0.464784	-0.064077	-0.791406
Arid4a		1080		1	0.0301627	-0.288572	-0.216073	0.392456	-0.519302	-0.96924	0.42231	0.159206	0.231389	0.607252
Arid4a		935		1	0.0363611	-0.0345693	0.309969	-0.186191	0.924252	-0.447548	-0.12745	-0.646581	0.0692423	0.370566
Arid4a		712		0.801887	-0.207826	-0.146895	1.30023	0.33966	0.575601	-0.018528	-0.376588	-0.374964	0.290403	-1.043
Arid4a		713		0.981191	-0.39089	0.144549	1.2634	0.182655	0.520523	-0.0217927	-0.272658	-0.252437	0.0948864	-0.854279
Arid4a		719		1	-0.0503047	-0.924807	-0.181771	0.126742	-0.790759	-0.020772	0.765777	0.674528	0.42244	-0.303964
Ercc6		158		1	-0.386312	0.57763	0.00865348	-0.268503	0.073875	-0.164943	0.471774	0.0728579	-0.0360783	-0.0659717
Gltscr1		757		0.890722	-0.229844	0.464962	-0.991793	-0.669253	-0.0826111	0.944726	-0.337592	0.613047	-0.104463	0.156061
Gltscr1		1427		1	-0.0687215	-0.105173	0.613008	-0.0129725	-0.0426682	0.345535	-0.094027	-0.021114	-0.286986	-0.234097
Fryl		1973		1	-0.111128	-0.126412	0.53482	-0.60598	0.95766	0.389921	-0.0640374	0.265203	-0.818278	-0.0962609
Fryl		1338		0.697194	-0.217006	-0.461813	0.0238194	-0.743995	-0.147146	-0.81967	-0.176594	0.65656	0.943356	0.752055
Fryl		1958		0.866034	-0.762263	-0.208103	-1.05266	0.674848	0.801611	0.0657865	0.329096	-0.440808	0.581125	-0.0211455
Sis		46		0.989197	0.46638	-0.202066	0.472649	0.667438	0.183641	0.426541	-0.46781	-0.66514	-0.423769	-0.46126
F830016B08Rik		35		1	0.165668	-0.184595	0.308442	-0.545279	0.578595	0.206242	0.316249	0.537471	-0.513845	-0.614275
Cabin1		1702		0.859726	-0.51638	0.102024	0.0409524	0.0631343	-1.21875	-0.537974	0.758587	0.552074	0.651193	0.0258447
Cabin1		1752		0.81363	-0.278029	0.053917	0.519086	-0.736924	-0.400944	-0.399137	1.1567	0.902111	-0.174904	-0.309683
Dhx16		143		1	0.0219368	0.229456	0.50525	0.0882918	0.255782	-0.436825	0.141566	-0.215836	-0.272558	-0.0340499
Sh3tc1		481		0.959799	-0.824809	0.0475213	-0.390175	-0.764217	-0.161275	0.714735	0.480917	0.307322	0.236415	0.347813
Sh3tc1		482		1	0.109329	-0.258237	-0.275517	-0.450118	-0.203849	0.145427	-0.0271965	0.514318	0.650241	-0.395598
Sh3tc1		105		1	-0.215398	-0.432916	-0.155455	0.319651	0.728961	0.219068	-0.0299456	0.47555	0.302158	-1.18401
Sipa1l3		1358		1	-0.244247	-0.703371	-0.373994	0.24259	-0.176779	-0.124366	0.284986	0.484451	0.146224	0.222216
Arfgef1	Brefeldin A-inhibited guanine nucleotide-exchange protein 1	1076		0.50505	-0.579245	-0.726963	0.534849	-0.329771	-1.56784	0.391058	0.678784	0.323485	0.594026	0.411322
Arfgef1	Brefeldin A-inhibited guanine nucleotide-exchange protein 1	1563		1	0.000676678	0.023909	0.318456	-0.822021	0.690334	0.204797	0.557317	0.292215	-0.463744	-0.404436
Arfgef1	Brefeldin A-inhibited guanine nucleotide-exchange protein 1	1566		1	-0.0851128	0.00433017	-1.10793	0.0769492	-0.755003	0.378864	0.618057	0.513386	0.396744	-0.350422
Arfgef1	Brefeldin A-inhibited guanine nucleotide-exchange protein 1	52		0.89018	-0.180888	0.220956	-1.23248	-0.0342411	0.593807	0.476133	0.0923004	-0.428991	0.758331	-0.34628
Pcf11		705		1	0.421323	-0.273295	0.622098	-0.676264	-0.276674	-0.455596	0.525068	0.452397	-0.0278347	-0.161922
Pcf11		512		1	0.133475	-0.138261	0.518835	0.335959	-0.195726	0.277049	0.79076	-0.726341	-0.210997	-0.540852
Pcf11		495		0.770724	-0.53776	-0.682362	-0.231348	0.270298	-0.431398	-0.380736	0.0345871	1.2686	0.777911	-0.415421
Hnrnpu	Heterogeneous nuclear ribonucleoprotein U	58;58		0.646194	0.566163	0.559992	0.714681	0.409276	0.54921	-0.311872	-0.0662552	-0.0184712	-0.950647	-1.01267
Hnrnpu	Heterogeneous nuclear ribonucleoprotein U	4;4		0.692726	0.271252	-1.39332	0.29734	-0.73826	0.515419	0.795115	-0.102273	-0.28999	0.156561	0.317444
Rab11fip2;Rab11fip1	Rab11 family-interacting protein 1	150;158		0.980543	-0.16787	-0.341437	0.675627	0.432768	0.683763	0.513669	-0.152598	-0.140437	-0.333153	-0.953995
Rab11fip2		277		0.84375	-1.12726	-0.489739	0.904248	0.184351	0.247411	0.390207	0.583816	0.366327	0.111037	-0.858963
Atp2b1		338		1	0.0393473	0.0858372	-0.452429	0.665299	-0.397687	-0.644205	0.0503175	-0.166203	0.779346	-0.138113
Atp2b1		1155		0.990603	-0.758246	0.134578	-0.763657	0.355377	-0.834263	0.411432	0.326787	0.322317	0.313155	0.208381
Atp2b1		1178		1	0.32574	0.195596	0.292049	0.0217666	-0.459754	-0.662923	0.263348	-0.101989	-0.122043	0.321019
Atp2b1		1211		0.112533	-0.919625	-0.949166	-0.654165	-0.462225	-0.195008	-0.487775	0.813399	1.18583	0.739959	0.682538
Atp2b1		1219		1	0.0694321	0.320741	-0.568987	-0.297202	-0.661906	0.250117	0.581806	0.61066	-0.259635	-0.127113
Trip12	E3 ubiquitin-protein ligase TRIP12	1024		0.955648	-0.594469	0.603987	-0.515759	-0.0566726	-0.158907	0.497854	-0.600353	0.51567	0.689555	-0.548664
Trip12	E3 ubiquitin-protein ligase TRIP12	1030		1	-0.219011	0.248936	-0.12528	-0.425113	-0.05552	-0.471115	0.88963	0.237361	0.346279	-0.186726
Trip12	E3 ubiquitin-protein ligase TRIP12	310		0.869315	-0.0727138	-0.359339	0.612149	-0.181418	-1.07633	0.563589	-0.57611	0.610974	-0.321733	0.45102
Trip12	E3 ubiquitin-protein ligase TRIP12	312		1	-0.896515	-0.095804	-0.364405	-0.0816345	-0.212764	0.524992	0.590535	0.622637	-0.0175042	-0.0901461
Trip12	E3 ubiquitin-protein ligase TRIP12	1409		1	-0.59939	-0.66926	-0.324962	-0.385296	0.615309	0.230024	0.51875	-0.113628	0.540921	0.222492
Trip12	E3 ubiquitin-protein ligase TRIP12	77		1	0.0271221	-0.0719223	0.421275	0.175896	0.546155	0.167561	-1.33755	0.101464	0.0591391	-0.199649
Trip12	E3 ubiquitin-protein ligase TRIP12	239		1	0.187056	0.365825	0.276218	0.165973	0.550349	0.288116	-0.0314662	-0.181639	-0.963411	-0.36679
Trip12	E3 ubiquitin-protein ligase TRIP12	161		0.890228	-0.0378389	-0.963041	-0.727048	-0.223629	0.130194	0.0585988	0.989696	0.768103	0.168788	-0.306373
Trip12	E3 ubiquitin-protein ligase TRIP12	1281		1	0.125621	-0.525152	0.51075	0.0774191	0.744911	-0.155203	0.0262266	-0.173263	-0.148072	-0.294054
Trip12	E3 ubiquitin-protein ligase TRIP12	1049		1	-0.118578	-0.263809	0.427204	0.476222	-0.196481	0.0510256	1.00996	-0.549644	-0.50225	-0.0894335
Ankrd12		149		0.800555	-0.706305	0.178756	1.03894	0.572169	0.707609	0.343646	-0.0881027	-0.110034	-0.872884	-0.604494
Arfip1		39		1	-0.771738	-0.0632765	0.131462	-0.502021	-0.115213	0.579853	0.245431	0.678078	0.266167	-0.399141
Gm9923		349		1	0.224633	0.0192767	0.0386301	-0.326474	0.137555	-0.576504	0.147527	-0.137338	0.548829	0.00961163
Gm7694		221		1	0.503593	-0.147029	-0.272342	-0.75646	0.514474	0.12215	-0.0735024	-0.225677	-0.342079	0.682272
Mthfs;Gm2382	5-formyltetrahydrofolate cyclo-ligase	8;8		1	0.186171	-0.720847	0.636516	0.0719147	0.571666	-0.0681755	-0.00602004	-0.18384	-0.139206	-0.227851
Usp35	Ubiquitin carboxyl-terminal hydrolase	929		0.0829254	-0.985063	-0.674949	-0.492355	-0.196671	-0.440034	-0.533083	1.83904	0.567918	0.752131	0.22099
Bin1	Myc box-dependent-interacting protein 1	298		0.770585	-0.394172	-0.220702	0.419304	-0.144002	0.545729	0.778828	0.679162	0.379664	-0.11823	-1.56971
Bin1	Myc box-dependent-interacting protein 1	304		1	-0.811435	-0.23729	-0.0228135	-0.234063	0.424922	0.808315	0.197949	0.232494	0.200889	-0.468275
Bin1	Myc box-dependent-interacting protein 1	321		0.711922	1.19774	-0.468166	-0.757397	-0.651018	0.0339863	-0.264658	0.431409	0.26317	-0.447249	0.472138
Bin1	Myc box-dependent-interacting protein 1	324		0.28983	0.411803	0.425545	-1.7843	-0.765253	-0.232541	0.0125299	0.500903	0.580612	0.0311789	0.546925
Sec22b	Vesicle-trafficking protein SEC22b	175		0.927483	0.0108823	-0.873542	0.199291	0.586442	-0.144549	0.278645	1.29045	-0.619707	-0.298052	-0.311947
Sec22b	Vesicle-trafficking protein SEC22b	168		0.7191	-1.13799	-1.05228	0.0344951	0.214635	0.85282	0.476629	-0.147355	0.683556	0.455551	-0.458135
Sec22b	Vesicle-trafficking protein SEC22b	137		0.975509	-0.543176	0.171678	0.184561	-0.0660712	-1.1935	0.763263	0.72556	-0.215635	0.013276	0.132117
Kmt2b	Histone-lysine N-methyltransferase 2B	866		1	-0.705024	-0.0910291	-0.0985279	0.438822	0.7383	-0.0506292	-0.00520722	0.0135531	-0.0306845	-0.0736892
Kmt2b	Histone-lysine N-methyltransferase 2B	941		1	0.38817	0.469299	-0.4444	-0.707533	0.608932	0.328206	0.213732	-0.295964	-0.0511266	-0.297424
Dpysl2	Dihydropyrimidinase-related protein 2	540		1	-0.906185	0.431817	-0.541046	0.0774454	0.418425	0.00458154	0.276088	-0.548378	0.340199	0.593373
Gtpbp1	GTP-binding protein 1	580		1	0.0347468	0.259626	-0.404297	0.276741	-0.000359877	0.135884	0.367204	-0.0411117	0.180615	-0.753504
Gtpbp1	GTP-binding protein 1	6		1	0.411179	0.686167	-0.198351	0.0150598	-0.0358156	-0.149206	0.867024	-0.0872861	-0.304498	-0.874517
Clta	Clathrin light chain A	104		0.325056	-0.785932	-1.24399	-0.117668	-0.067802	-0.0882832	-0.664805	0.752053	0.831592	1.11428	0.0960798
Mknk1	MAP kinase-interacting serine/threonine-protein kinase 1	39		1	-0.281133	-0.566001	0.490861	0.324484	0.344884	0.41754	0.455063	-0.239262	-0.098177	-0.667058
Mlx	Max-like protein X	45		1	-0.277039	-0.226092	0.502573	-0.368814	0.439695	0.188367	-0.516137	0.459926	0.480719	-0.633188
Map3k4	Mitogen-activated protein kinase kinase kinase 4	454		1	0.0949824	-0.541939	-0.523795	0.0477219	0.185901	0.277121	0.181045	0.77757	-0.00691602	-0.666389
Map3k4	Mitogen-activated protein kinase kinase kinase 4	1241		1	-0.729903	0.582849	0.595243	0.0839616	-0.677956	-0.301487	-0.0578998	0.335173	0.389	-0.108423
Map3k4	Mitogen-activated protein kinase kinase kinase 4	1126		1	0.223477	-1.00469	-0.215995	-0.195226	0.181966	0.195793	-0.0253057	0.100918	0.447584	0.0254706
Bcl7c	B-cell CLL/lymphoma 7 protein family member C	126		1	-0.3324	0.459597	0.393983	0.299092	0.0550299	0.454315	-0.472199	-0.23908	0.115758	-0.624994
Bcl7c	B-cell CLL/lymphoma 7 protein family member C	97		0.874641	-0.647831	-0.182932	0.189603	-0.159705	0.253253	0.535355	-1.03007	-0.413424	0.392867	0.870349
Akap1	A-kinase anchor protein 1, mitochondrial	101		0.800178	0.0147655	0.172849	1.3152	-0.528565	-0.476488	0.537385	0.280026	0.22065	-0.582774	-0.630148
Akap1	A-kinase anchor protein 1, mitochondrial	103		0.90418	0.436783	-1.02903	-0.11962	0.480126	0.609266	0.0861145	-1.03444	0.419987	0.0717851	-0.314425
Nfil3	Nuclear factor interleukin-3-regulated protein	301		0.269885	-0.857031	-0.980466	-0.537315	0.55602	0.509249	-0.597325	-0.32495	0.116908	1.34814	0.433401
Nfil3	Nuclear factor interleukin-3-regulated protein	285		0.24209	-0.697713	-0.400863	-0.255414	0.141683	1.17087	-1.08051	-0.648389	0.781856	0.224351	0.730679
Ube3a	Ubiquitin-protein ligase E3A	213		1	0.359213	0.830969	0.109012	0.205611	0.182669	-0.0837983	-0.69556	-0.480824	0.054534	-0.375053
Ube3a	Ubiquitin-protein ligase E3A	8		0.952004	-0.80057	0.373947	0.225871	-0.435652	-1.07993	0.703676	0.239377	0.257139	0.294471	0.161489
Tcof1	Treacle protein	794		1	0.0322955	0.244682	0.0900319	-0.793016	-0.225072	0.226967	-0.247522	0.271623	0.374613	-0.00907166
Tcof1	Treacle protein	593		1	0.108143	0.208345	0.505087	0.0939556	0.454447	-0.222713	0.542185	-0.830745	0.000792712	-0.431981
Tcof1	Treacle protein	1216		1	-0.0923998	-0.479568	-0.244847	0.301821	0.203342	0.0383209	-0.129267	0.438962	0.35602	-0.554969
Tcof1	Treacle protein	1303		1	0.00232759	-0.200747	0.254673	0.533178	0.0780451	0.217727	-0.244321	0.22507	-0.116918	-0.777121
Tcof1	Treacle protein	1242		1	0.365594	-0.212546	0.49873	0.0322892	-0.154529	0.121585	0.367782	-0.0802483	-0.103848	-0.70995
Tcof1	Treacle protein	1191		1	0.0362565	0.11217	-0.527812	-0.480063	0.273115	0.28399	-0.127522	0.162396	0.260959	-0.0610024
Tcof1	Treacle protein	1267		1	0.624115	0.0505911	-0.316725	0.45184	-0.231199	-0.207042	-0.899655	-0.38538	0.209671	0.354536
Tcof1	Treacle protein	852		0.255397	0.8307	0.536364	-0.635394	0.166063	0.621784	-0.916609	-0.642918	0.964644	-0.214382	-0.740292
Tcof1	Treacle protein	853		0.93216	-0.71878	-0.531709	0.0981742	-0.473427	-0.00941551	0.554931	0.953093	0.993441	0.0775221	-0.816293
Tcof1	Treacle protein	169		0.987865	-0.589904	0.387501	-0.778513	0.229303	0.53791	0.33481	0.350296	0.089568	0.409235	-0.845908
Tcof1	Treacle protein	843		0.946514	0.136494	0.103489	0.220204	0.308489	0.27536	0.201621	0.248208	0.139869	0.0619726	-1.48389
Tcof1	Treacle protein	1126		1	0.314356	0.248672	-0.345422	-0.501542	-0.18525	-0.0298698	0.35889	0.0422621	-0.475794	0.59292
Mnt	Max-binding protein MNT	164		1	0.24711	0.0685796	0.26776	-0.33203	-0.928653	0.352696	0.330578	0.463909	-0.109477	-0.425905
Ebf2	Transcription factor COE2	161		0.996633	0.341125	0.719041	-0.864133	0.106053	0.659201	0.299947	-0.0583497	-0.488171	0.0531638	-0.653937
Eef2k	Eukaryotic elongation factor 2 kinase	469		0.757041	-0.331579	-0.904064	-0.702433	0.192247	0.256105	-0.542399	1.37495	0.640648	0.215124	-0.192459
Diaph1	Protein diaphanous homolog 1	22		0.206252	-1.35316	-0.681052	-0.136382	-0.575112	-0.218155	-0.277595	1.15599	1.00194	0.917632	0.195993
Lst1	Leukocyte-specific transcript 1 protein	64		1	-0.67912	0.233447	0.194037	0.264239	-0.299421	-0.119395	0.941055	0.0312229	-0.0955737	-0.203211
Hps1	Hermansky-Pudlak syndrome 1 protein homolog	282		1	0.153509	-0.780438	-0.10028	-0.0378383	0.634419	-3.32445e-05	1.14015	-0.107687	0.148317	-0.826657
Sdcbp	Syntenin-1	132		1	0.113784	0.114615	-0.123507	0.564073	-0.297016	0.641055	-0.425183	0.00681151	-0.373981	-0.403423
Ncoa3	Nuclear receptor coactivator 3	847		1	-0.775356	-0.601992	0.0824772	-0.512456	0.680341	0.280895	0.142784	0.48377	0.528147	-0.232708
Ncoa3	Nuclear receptor coactivator 3	648		1	0.0199395	0.0394596	0.488094	-0.400961	0.422127	-0.309567	0.642668	-0.833143	0.415667	-0.0861975
Ncoa3	Nuclear receptor coactivator 3	1304		1	0.0818579	-0.102063	0.327849	-0.408197	-0.678534	-0.0648367	0.507055	-0.389718	0.0690437	0.67112
Ncoa3	Nuclear receptor coactivator 3	544		0.910764	-0.137851	0.166736	0.637213	0.565712	-0.0381397	-0.00287225	0.349952	0.231753	-0.0516229	-1.44194
Ncoa3	Nuclear receptor coactivator 3	925		0.995903	-0.100299	-0.145773	-0.853681	-0.467189	0.37984	-0.318408	1.019	0.89202	-0.254008	-0.0516594
Ncoa3	Nuclear receptor coactivator 3	215		1	-0.820608	0.579303	0.260901	-0.230558	0.200591	0.546646	-0.735259	0.217176	0.0313094	0.0268815
Ncoa3	Nuclear receptor coactivator 3	92		1	-0.786159	-0.392916	0.626123	-0.0546977	0.350531	0.230296	0.00744132	0.0613363	0.193309	-0.0874696
Sh2b3	SH2B adapter protein 3	129		1	-0.409319	-0.283764	0.547549	-0.370294	0.341605	0.459988	0.578559	0.00921893	-0.144021	-0.433535
Snap23	Synaptosomal-associated protein 23	20		1	-0.0538925	-0.68102	0.737675	0.176976	-0.654514	0.238884	-0.535799	-0.350539	0.5061	0.332716
Snap23	Synaptosomal-associated protein 23	160		0.790773	-1.08759	-0.770075	-0.149723	-0.605845	0.559007	0.399775	0.208057	0.625651	0.607334	0.175225
C3ar1	C3a anaphylatoxin chemotactic receptor	218		1	0.10373	0.102448	0.199794	0.248605	-0.586923	-0.460835	0.418	0.542229	-0.650686	0.116968
Hdac1;Gm10093	Histone deacetylase 1;Histone deacetylase	393;393		1	0.178679	0.276984	0.455246	-0.434563	0.082894	0.240649	0.505081	-0.248801	-0.492371	-0.233746
Sema4d	Semaphorin-4D	797		1	-0.057489	-0.92059	0.00653758	-0.435088	-0.224652	0.304817	0.688382	0.307489	0.284345	-0.0663327
Sema4d	Semaphorin-4D	782		1	-0.480502	-0.318879	0.569875	0.362297	0.753594	0.468123	0.188488	-0.315929	-0.299459	-0.629338
Sema4d	Semaphorin-4D	787		0.981805	-0.254051	0.0888359	0.725525	0.279423	0.556224	0.753534	0.160411	-0.215291	-0.489317	-1.22254
Kif1c	Kinesin-like protein KIF1C	1031		0.977697	0.106563	-0.251612	0.704786	0.291234	-0.068041	-0.249742	0.615834	0.406586	-0.221455	-1.08391
Kif1c	Kinesin-like protein KIF1C	1089		1	-0.573138	-0.678619	1.04928	-0.250373	-0.0392609	-0.18583	-0.324141	0.606126	0.29075	0.107019
Map3k5	Mitogen-activated protein kinase kinase kinase 5	1040		1	-0.759124	-0.260746	-0.512919	-0.418216	-0.597034	0.451717	0.791636	0.749928	0.0626861	0.347306
Atn1	Atrophin-1	34		1	-0.302357	0.0626843	0.0717899	-0.267398	-1.36093	0.493743	-0.027291	0.375733	0.601068	0.0395214
Atn1	Atrophin-1	630		1	-0.729036	-0.487772	-0.0421071	-0.00633291	0.191518	0.37245	-0.531434	0.575763	0.2101	0.229401
Atn1	Atrophin-1	77		1	-0.802594	-0.0443499	-0.489417	-0.0110804	0.487908	0.375321	0.167936	0.26039	0.324006	-0.237601
Atn1	Atrophin-1	101		0.381159	-1.41261	0.146187	-0.550543	-0.0828537	-0.0615286	0.881736	0.721522	0.616453	0.309909	-0.504365
Terf2	Telomeric repeat-binding factor 2	367		1	-0.831437	0.0367199	-0.134447	-0.216472	-0.00186609	0.0880467	0.230226	0.542493	0.313188	0.00620754
Terf2	Telomeric repeat-binding factor 2	412		1	-0.10845	-0.00445185	-0.425648	0.153601	0.210554	-0.225351	-0.606489	0.523018	0.181744	0.0949637
Slc30a4	Zinc transporter 4	36		1	-0.109255	0.208178	-0.0206133	-0.8634	0.463624	0.102582	-0.662095	0.163901	-0.0320967	0.746448
Bet1l	BET1-like protein	37		1	-0.447881	0.181027	-0.151227	-0.252648	-0.0277628	0.542654	-0.85902	-0.331673	0.651407	0.480878
Cenpa	Histone H3-like centromeric protein A	15		0.991458	0.849869	0.391778	-0.196872	-0.413937	-0.378404	-0.794036	-0.381594	-0.152561	0.656307	0.278174
Psmd4	26S proteasome non-ATPase regulatory subunit 4	256		1	-0.135668	-0.0979787	0.162616	-0.103199	0.417388	-0.621787	0.883349	-0.413977	0.274008	-0.0234066
Purb	Transcriptional activator protein Pur-beta	8		0.887307	-0.256613	-0.82096	0.758522	0.627831	-0.409563	-0.266299	0.846168	0.198073	0.0372519	-0.620869
Purb	Transcriptional activator protein Pur-beta	112		1	0.779065	-0.883566	-0.0327362	0.366211	0.11166	-0.289559	-0.0147556	-0.588342	-0.0250195	0.372194
Purb	Transcriptional activator protein Pur-beta	113		0.988156	-0.0239863	0.292601	0.410892	0.100922	0.135068	0.168597	-1.65081	0.075835	0.278947	0.00887254
Slc6a6	Sodium- and chloride-dependent taurine transporter	21		1	0.235466	-0.182933	-0.501003	0.0924049	0.0577436	0.370752	-0.872118	-0.189749	0.48308	0.131779
Slc6a6	Sodium- and chloride-dependent taurine transporter	25		0.511605	0.517887	-1.24499	-0.0611529	-0.624003	-0.431078	0.195373	-0.199167	0.744354	0.932975	-0.314291
Srsf5;Srsf6;Srsf4	Serine/arginine-rich splicing factor 5;Serine/arginine-rich splicing factor 4	116;118;112		0.923421	-0.0977188	0.601374	0.815491	0.1971	-0.165956	0.183796	0.32503	-0.0647109	-0.184304	-1.21612
Srsf5;Srsf6;Srsf4	Serine/arginine-rich splicing factor 5;Serine/arginine-rich splicing factor 4	117;119;113		1	-0.253606	0.105802	-0.678246	-0.211335	0.150865	0.0176841	-0.234228	0.239491	0.206573	0.493048
Srsf5	Serine/arginine-rich splicing factor 5	247		1	-0.591503	-0.292921	0.235795	0.348833	-0.0109864	-0.522933	0.357194	0.102786	0.315518	0.130488
Srsf5	Serine/arginine-rich splicing factor 5	250		1	-0.0292475	-0.24872	-0.100565	0.292901	0.531109	-0.12004	-0.0320469	0.109124	-0.00364985	-0.36142
Kpna3	Importin subunit alpha-4	56		0.541659	-1.35986	-0.747348	1.06005	0.557339	0.174027	0.440679	0.275293	0.232996	-0.416387	-0.0262814
Kpna3	Importin subunit alpha-4	60		1	-0.619624	-0.440096	-0.111892	-0.238369	0.013948	0.5676	0.474128	0.611721	0.493128	-0.766521
Ifi203	Interferon-activable protein 203	173		0.997051	0.254405	0.260025	0.298925	-0.538654	-0.608465	0.264206	0.317279	0.364876	0.499456	-1.04511
Abcc1	Multidrug resistance-associated protein 1	289		1	0.487899	0.862054	-0.422707	-0.166648	-0.020976	-0.525315	-0.67283	0.105566	0.256964	0.0323781
Abcc1	Multidrug resistance-associated protein 1	290		1	-0.355582	-0.334583	-0.0766056	-0.163671	0.399543	0.216961	-0.0340698	0.227105	0.59555	-0.486076
Abcc1	Multidrug resistance-associated protein 1	918		0.297327	-0.493731	-0.522957	0.555994	0.927903	1.05074	0.566514	-0.585239	0.195778	-0.768915	-0.801448
Abcc1	Multidrug resistance-associated protein 1	878		1	-0.181813	-0.792463	0.0835829	0.0524053	0.501294	0.863142	-0.588431	0.0709018	0.104005	-0.311628
Abcc1	Multidrug resistance-associated protein 1	882		1	-0.830103	0.160391	-0.363537	0.273748	-0.0439858	0.52876	-0.534607	0.678122	0.276103	-0.340325
Abcc1	Multidrug resistance-associated protein 1	884		0.993681	-0.825562	0.0923374	0.250944	0.309806	0.414244	0.485466	0.530842	0.242801	-0.283933	-0.894853
Anp32a;Anp32c	Acidic leucine-rich nuclear phosphoprotein 32 family member A;Putative acidic leucine-rich nuclear phosphoprotein 32 family member C	77;77		1	-0.448862	0.948467	-0.418764	0.0530876	-0.64441	-0.0441577	0.797701	-0.125575	0.13362	-0.0803583
Exoc4	Exocyst complex component 4	226		0.0676255	-1.31446	-0.633927	-0.435598	-0.888478	-0.276482	-0.290116	1.48297	0.921944	0.815072	0.65332
Exoc4	Exocyst complex component 4	32		1	0.0857558	-0.0438154	0.308635	0.970648	0.704339	-0.489271	-0.0519302	-0.507851	-0.472614	-0.274589
Clk4;Clk1	Dual specificity protein kinase CLK4;Dual specificity protein kinase CLK1	339;340		1	0.0310689	0.463799	0.577045	-0.323189	-0.497342	-0.376719	-0.00988768	0.12627	0.484006	-0.341648
Cdk14	Cyclin-dependent kinase 14	119		0.725104	0.00534728	0.134862	0.477739	0.917269	0.76759	-0.15174	0.0432684	-0.89196	-0.0835234	-0.862988
Cdk14	Cyclin-dependent kinase 14	24		0.954524	0.178591	0.122932	0.246138	-0.42622	0.713419	-0.336657	0.0927536	0.496044	0.36123	-1.15442
Cdk14	Cyclin-dependent kinase 14	78		1	0.0473773	-0.0167145	0.147466	-0.0862597	0.749782	0.305879	-0.1644	0.564222	-0.381551	-0.986769
Notch2	Neurogenic locus notch homolog protein 2;Notch 2 extracellular truncation;Notch 2 intracellular domain	1777		0.444577	-0.0961125	-0.759436	-1.22038	-0.287481	-0.112165	-0.223977	1.25621	-0.217544	1.05301	0.398933
Notch2	Neurogenic locus notch homolog protein 2;Notch 2 extracellular truncation;Notch 2 intracellular domain	1843		0.555141	-0.295044	-0.829149	0.482011	-0.213343	-0.584183	0.54868	1.07289	0.0675306	0.736721	-0.950725
Rabep1	Rab GTPase-binding effector protein 1	407		1	0.293271	-0.784959	0.0437491	0.0323531	-0.0542224	0.219055	0.673408	0.17456	0.289945	-0.917666
Fyb	FYN-binding protein	252		0.377896	0.912812	0.442058	-1.5743	-0.766481	0.733255	0.0908884	-0.47691	0.685021	0.0208369	-0.286158
Fyb	FYN-binding protein	770		0.887304	-0.570489	0.219495	-0.733495	0.00397458	0.593591	0.524458	-0.816028	0.570672	0.70053	-0.676818
Fyb	FYN-binding protein	663		1	-0.294586	-0.132089	0.33851	-0.488188	-0.053946	0.0899259	1.17131	0.380232	-0.484801	-0.195424
Fyb	FYN-binding protein	665		0.615245	-0.596563	0.0504972	-0.865022	-0.69989	-0.0873532	-0.35055	0.108928	1.04653	0.754533	0.44065
Fyb	FYN-binding protein	672		0.993506	-0.629865	0.265295	-0.62014	0.3072	0.710926	-0.879734	0.299214	0.0200757	0.609584	0.0812682
Fyb	FYN-binding protein	89		1	0.25914	0.0410139	0.782315	0.284411	-0.623104	-0.646895	0.09512	-0.49128	-0.0154894	0.388605
Fyb	FYN-binding protein	222		0.396787	-0.530122	-1.08286	-0.874347	-0.225001	0.220256	0.0819838	-0.912661	0.477849	1.34174	0.840753
Fyb	FYN-binding protein	201		0.843643	-0.81314	0.933797	0.0265448	-0.260849	-0.476973	-0.60141	-0.0686524	0.566878	0.347317	0.450167
Fyb	FYN-binding protein	203		1	-0.168843	-0.593197	0.361818	-0.0361618	-0.211393	-0.194032	1.37325	0.0211971	-0.172112	-0.147909
Fyb	FYN-binding protein	207		0.996606	0.232023	-0.58428	0.517254	0.0127804	0.694676	0.546499	-0.158804	0.0630958	-0.970814	-0.235218
Fyb	FYN-binding protein	568		1	-0.584634	-0.46296	0.158944	-0.330244	-0.182347	0.064201	0.508987	0.472045	0.267758	0.0939061
Fyb	FYN-binding protein	46		1	-0.538457	-0.509134	0.299647	-0.581514	0.455922	-0.283293	0.605621	-0.195752	0.309356	0.650618
Fyb	FYN-binding protein	114		0.878967	-0.876252	-0.70332	-0.117161	-0.778418	0.139562	-0.167912	0.321442	0.627419	0.797254	0.667517
Fyb	FYN-binding protein	561		0.99605	-0.865819	0.121539	0.294432	0.293085	0.541018	0.425847	0.356547	0.307381	-0.739986	-0.40566
Fyb	FYN-binding protein	28		1	-0.0568356	-1.41236	0.209056	0.196096	0.475933	0.129809	-0.161112	0.0133506	-0.00156115	0.385507
Bmpr2	Bone morphogenetic protein receptor type-2	862		0.481621	-0.18896	-0.66547	-0.292201	-0.231738	-0.70458	-0.80288	0.580338	0.211248	1.2791	0.544663
Bmpr2	Bone morphogenetic protein receptor type-2	863		0.320497	-0.766693	-0.140899	-0.611092	-0.0388288	-0.298328	-0.824627	-0.198624	1.2736	0.476044	0.817214
Scamp3	Secretory carrier-associated membrane protein 3	14		1	-0.162043	-0.245712	0.619176	-0.401644	-0.569613	0.0412305	0.816188	0.200433	-0.306508	0.163502
Scamp3	Secretory carrier-associated membrane protein 3	78		0.781041	-0.577192	-0.847906	0.342381	0.257568	-0.641295	-0.713994	0.378689	0.642203	0.556735	0.410779
Daxx	Death domain-associated protein 6	515		1	0.134298	-0.396968	0.196973	0.403218	-0.25451	-0.0746658	0.00765109	0.235314	-0.300979	-0.0620442
Zfpm1	Zinc finger protein ZFPM1	679		1	0.157534	-0.309635	-0.353931	0.00388858	0.171546	-0.37749	0.0442775	0.279014	0.720902	-0.448041
Bet1	BET1 homolog	50		1	-0.73267	-0.202983	0.156756	-0.520141	0.258707	0.476486	0.118208	0.413068	0.333341	-0.2181
Ifnar2	Interferon alpha/beta receptor 2	415		1	0.572692	0.45448	-1.18728	0.0987065	0.656992	-0.282141	-0.172169	-0.257188	-0.256586	0.310495
Ifnar2	Interferon alpha/beta receptor 2	416		1	0.0715446	0.623494	-0.440989	-0.360728	0.366285	0.792034	-0.176689	-0.580782	0.215307	-0.416452
Ifnar2	Interferon alpha/beta receptor 2	403		1	-0.273631	-0.29977	0.524368	-0.481448	0.366155	0.764718	0.131707	0.215519	0.25583	-1.02283
Ifnar2	Interferon alpha/beta receptor 2	448		0.936003	0.070889	-0.0814256	0.135773	-0.558997	-0.805892	0.561183	-1.06862	0.704675	0.480324	0.107053
Itgb1bp1	Integrin beta-1-binding protein 1	11		0.630784	-0.993222	-0.593085	0.116171	-0.190922	-0.110044	-0.717536	1.10393	0.583732	0.429857	0.50036
Itgb1bp1	Integrin beta-1-binding protein 1	41		0.719807	-0.792556	-1.26358	-0.33594	-0.160947	-0.0159985	0.177048	0.696541	0.66985	0.717555	0.078282
Nudc	Nuclear migration protein nudC	139		1	0.49533	-0.414074	0.465039	0.0292465	0.4538	0.0426133	-0.211488	0.122467	-0.379411	-0.530205
Pnn	Pinin	346		1	-0.186378	-0.342263	0.0497638	0.0566268	0.117343	0.539112	-0.100868	0.181015	0.25501	-0.638367
Pnn	Pinin	450		0.655462	0.453978	-0.384355	-0.109766	0.433638	0.834509	0.713114	0.358798	-0.211052	-0.550352	-1.36372
Pnn	Pinin	457		0.973173	-0.136196	0.115177	-0.905022	-0.586666	-0.276739	0.0590899	0.78944	-0.389888	0.692899	0.568619
Pnn	Pinin	96		1	-0.316635	0.648621	0.784397	0.291329	-0.0672463	0.258771	0.0332319	-0.727857	-0.274091	-0.280769
Pnn	Pinin	100		1	0.129333	0.294714	0.494747	-0.363036	0.181553	0.405646	-1.16527	0.4108	-0.375931	-0.0611218
Pnn	Pinin	66		1	0.472215	-0.170386	-1.17808	0.134856	0.220683	0.155381	0.777225	-0.277382	0.01622	-0.238371
Pnn	Pinin	412		0.833069	-0.268513	0.168772	0.889165	0.34711	0.0982518	0.786894	0.0133526	-0.0756697	-0.833019	-0.833958
Pnn	Pinin	416		1	-0.424348	-0.0138809	0.460398	-0.194622	0.583035	0.782388	-0.0902451	-0.309059	-0.443782	-0.115058
Pnn	Pinin	700		1	-0.0284804	0.42589	0.574739	0.185034	-0.751647	0.482109	0.131179	-0.0263141	-0.481873	-0.415595
Pnn	Pinin	380		1	-0.807278	0.44339	0.277535	0.368617	-0.706422	0.350903	0.541529	-0.0845255	-0.0572769	-0.187464
Ppfibp2	Liprin-beta-2	518		1	-0.110981	0.0142447	0.40359	-0.153629	0.700668	-0.595502	0.507825	-0.10084	-0.223103	-0.0356898
Ring1	E3 ubiquitin-protein ligase RING1	248		1	-0.153436	-0.809489	0.12512	-0.0646146	0.130231	-0.267311	-0.120084	0.803083	0.199428	-0.0114817
Ring1	E3 ubiquitin-protein ligase RING1	324		0.514996	0.605002	-0.0753912	0.557551	-0.519942	0.606681	0.437269	0.613397	0.0517702	-1.5433	-0.307476
Ring1	E3 ubiquitin-protein ligase RING1	38		0.935859	-0.142839	0.848067	0.283836	-0.38018	-0.272693	0.364521	0.969796	0.398807	-0.491247	-1.12082
Hnrnph1;Hnrnph2	Heterogeneous nuclear ribonucleoprotein H;Heterogeneous nuclear ribonucleoprotein H, N-terminally processed;Heterogeneous nuclear ribonucleoprotein H2;Heterogeneous nuclear ribonucleoprotein H2, N-terminally processed	63;63		0.960434	-0.736888	0.196088	0.38578	-0.707604	-0.901745	0.33539	0.417656	0.38152	0.347631	0.306617
Hnrnph1;Hnrnph2	Heterogeneous nuclear ribonucleoprotein H;Heterogeneous nuclear ribonucleoprotein H, N-terminally processed;Heterogeneous nuclear ribonucleoprotein H2;Heterogeneous nuclear ribonucleoprotein H2, N-terminally processed	104;104		0.440892	-0.296178	-0.302163	-0.635493	-0.174452	-1.55818	-0.125288	1.07667	0.930608	0.609822	0.119863
Api5	Apoptosis inhibitor 5	464		0.991192	0.275773	0.379808	0.287973	-1.02682	0.149581	0.0438789	0.405877	0.548917	-0.583076	-0.176104
Cops5	COP9 signalosome complex subunit 5	284		1	0.13535	-0.377962	0.55301	-0.405168	-0.162245	0.383556	0.656025	-0.00833655	-0.118987	-0.488036
Calu	Calumenin	60		1	-1.03363	-0.212457	-0.140031	0.310995	0.704277	0.277334	0.226359	-0.00981298	0.221943	-0.200441
Calu	Calumenin	69		1	-0.229388	-0.121857	0.452008	-0.177681	-0.422953	0.459574	0.232337	-0.17508	-0.33157	0.349493
Sp100	Nuclear autoantigen Sp-100	314		1	-0.671142	0.15615	0.26364	0.14647	0.332605	0.440204	0.396432	-0.367103	0.327609	-0.737658
Pitpnm1	Membrane-associated phosphatidylinositol transfer protein 1	621		1	-0.0767335	-0.0697721	0.445849	-0.794081	0.315468	0.370703	-0.219618	0.459849	-0.516909	0.203226
Pitpnm1	Membrane-associated phosphatidylinositol transfer protein 1	593		1	0.422691	0.328089	-0.246915	-0.57908	-0.627459	0.500129	-0.0739353	0.0831101	-0.169927	0.208243
Psmb10	Proteasome subunit beta type-10	229		1	-0.50274	0.109879	0.192341	-0.00425431	-0.629608	-0.136411	0.807213	-0.360583	0.707893	-0.0637723
Mrpl23	39S ribosomal protein L23, mitochondrial	118		0.935873	0.237282	-0.431595	0.54584	-0.651418	-1.18325	0.541335	-0.226742	0.064221	0.535913	0.244481
Pbx2	Pre-B-cell leukemia transcription factor 2	151		0.982232	-0.058088	-0.048897	0.023578	0.127718	-0.516538	0.810148	0.777326	0.127431	-0.24267	-0.941141
Pbx2	Pre-B-cell leukemia transcription factor 2	330		0.759865	-0.117181	0.325762	0.743523	0.445827	1.08341	0.624894	-0.590946	-0.163799	-1.18084	-0.780213
Zw10	Centromere/kinetochore protein zw10 homolog	438		1	-0.527028	-0.00253268	-0.491019	-0.649639	-0.384412	-0.14158	0.495157	0.971368	0.594851	0.0391326
Ap3d1	AP-3 complex subunit delta-1	760		1	-0.114337	-0.461733	0.519309	0.464251	0.475495	0.504879	-0.598769	-0.317919	-0.296746	-0.190853
Ap3d1	AP-3 complex subunit delta-1	825		0.906654	-0.544936	-0.456066	-0.543395	-0.333309	-0.348005	-0.489631	0.355255	0.77196	0.945356	0.394719
Ap3d1	AP-3 complex subunit delta-1	784		1	-0.368996	-0.462357	0.283293	0.0120618	-0.106637	0.185385	0.896741	0.47549	0.0163032	-0.778524
Srpk2	SRSF protein kinase 2;SRSF protein kinase 2 N-terminal;SRSF protein kinase 2 C-terminal	10		0.981519	-0.176831	-1.31178	0.192844	0.236444	0.455007	0.289436	-0.416613	0.385756	0.288983	-0.21338
Srpk2	SRSF protein kinase 2;SRSF protein kinase 2 N-terminal;SRSF protein kinase 2 C-terminal	490		0.962606	-0.525218	-0.566507	-0.0062449	-0.163583	-0.305333	-0.324071	0.70319	0.33508	1.04591	-0.236944
Dffa	DNA fragmentation factor subunit alpha	28		0.0771181	-0.41891	-0.287118	-0.625359	-0.876244	-0.201692	-0.549958	1.60519	1.29593	0.296263	-0.115351
Dffa	DNA fragmentation factor subunit alpha	314		1	0.149011	-0.0678553	-0.580749	-0.316065	0.248902	0.208815	0.174119	-0.00404543	-0.0527169	0.184188
Il16	Pro-interleukin-16;Interleukin-16	917		0.603619	-0.275712	-0.699596	-0.898548	-0.388454	0.524583	-0.489811	0.0523885	1.07589	0.922519	-0.0785499
Il16	Pro-interleukin-16;Interleukin-16	839		1	-0.274762	-0.670632	0.306194	-0.056371	0.403312	0.515688	0.25007	-0.393289	-0.507502	0.499528
Mllt10	Protein AF-10	691		0.980772	1.02182	0.0803822	-0.176273	0.153037	-0.510604	-0.380318	0.530124	0.230192	-0.0224832	-0.944966
Rgs9	Regulator of G-protein signaling 9	407		1	-0.06599	-0.849064	-0.549834	-0.0559214	0.08097	0.684015	0.753503	0.295561	-0.191063	-0.243282
Arhgap6	Rho GTPase-activating protein 6	669		0.978021	0.00160357	-0.0306116	0.0904679	-0.637051	-0.223644	0.491276	1.16783	0.282507	-0.119203	-0.772162
Arhgap6	Rho GTPase-activating protein 6	850		1	-0.45647	-0.132301	-0.195643	0.563561	0.486948	-0.575228	0.513609	-0.202244	0.20832	-0.0423989
Arhgap6	Rho GTPase-activating protein 6	718		1	0.543745	0.5863	0.401543	0.24406	0.409021	0.109504	-0.219662	-0.644014	-0.536602	-0.599595
Arhgap6	Rho GTPase-activating protein 6	712		0.983643	-0.920932	-0.241051	0.90458	0.318357	0.227539	-0.0207455	-0.692193	0.595028	-0.108086	-0.0127778
Tyrobp	TYRO protein tyrosine kinase-binding protein	90		0.800035	0.132932	-0.153512	-0.0553075	-0.0757306	-0.875228	0.73507	-0.0625581	0.0276617	0.912961	-0.87294
Reps1	RalBP1-associated Eps domain-containing protein 1	392		1	-0.714801	0.0744217	0.272266	0.139191	0.358113	0.57873	0.549587	-0.378067	-0.688946	0.123101
Reps1	RalBP1-associated Eps domain-containing protein 1	708		1	-0.0231564	0.00521702	0.406215	0.272598	0.294676	-0.991763	-0.831388	0.226553	0.337246	0.272482
Reps1;Reps2	RalBP1-associated Eps domain-containing protein 1;RalBP1-associated Eps domain-containing protein 2	766;492		0.960756	-0.665844	-0.7531	0.515669	0.0447723	0.224023	-0.347618	1.20181	-0.564488	0.662869	-0.0209951
Reps1	RalBP1-associated Eps domain-containing protein 1	482		1	-1.00298	0.0434189	-0.120812	-0.70804	0.11633	0.0785279	0.771921	0.39385	0.362565	0.267934
Reps1	RalBP1-associated Eps domain-containing protein 1	561		1	-0.975045	0.107331	0.33314	-0.66394	0.272328	0.0407945	0.198106	0.296677	0.31059	0.307746
E2f6	Transcription factor E2F6	12		1	0.336501	-0.883939	-0.516267	-0.55234	-0.0149384	-0.208631	0.458368	0.372696	0.285196	0.484161
Bcl2l11	Bcl-2-like protein 11	73		1	-0.519657	-0.580155	0.261037	-0.321127	0.403972	-0.1276	1.36834	-0.254407	0.177279	-0.044383
Akap2	A-kinase anchor protein 2	650		0.930692	-0.659914	-0.49404	0.225292	-0.626612	-0.214685	-0.177151	0.793204	0.852365	0.598981	-0.219997
Bnip2	BCL2/adenovirus E1B 19 kDa protein-interacting protein 2	114		1	-0.764163	-0.310148	0.353115	0.00391822	0.17202	0.217822	-0.301426	0.826744	0.508697	-0.728189
Dnajb6	DnaJ homolog subfamily B member 6	15		0.774633	-0.867714	-0.297947	-0.315371	-0.566571	0.315165	-0.144243	0.104817	0.011219	0.288379	1.42393
Slk	STE20-like serine/threonine-protein kinase	666		1	-0.038803	-0.0479678	-0.348522	0.158848	0.323461	-0.0647769	1.1612	-0.13493	-0.170185	-0.566279
Slk	STE20-like serine/threonine-protein kinase	340		1	-0.370315	-0.350188	0.135091	-0.304821	0.416425	0.0650117	0.0590994	0.115476	0.174065	0.125263
Slk	STE20-like serine/threonine-protein kinase	341		0.676308	-0.0567165	0.438669	-0.202979	-0.625908	-0.289812	-0.955088	0.857613	0.557199	-0.414026	0.891922
Slk	STE20-like serine/threonine-protein kinase	347		1	-0.0769703	-0.317121	0.209807	0.244758	0.274354	-0.458656	0.383443	0.697033	-0.0432472	-0.775779
Slk	STE20-like serine/threonine-protein kinase	348		0.688599	-0.459714	-0.521789	0.226099	-0.903685	0.191284	-0.758214	0.123256	0.564931	0.95178	0.590764
Slk	STE20-like serine/threonine-protein kinase	647		1	0.249164	0.00270775	0.219924	-0.0888359	-0.439332	-0.396959	-0.683369	0.498556	0.211253	0.201874
Slk	STE20-like serine/threonine-protein kinase	777		1	0.650971	-0.191744	-0.695389	-0.0572702	1.0223	-0.194486	-0.344278	0.110203	-0.12894	-0.22364
Slk	STE20-like serine/threonine-protein kinase	444		0.51553	-1.43932	0.312156	0.604251	-0.349022	0.509921	-0.619874	0.380439	0.00668473	0.703676	0.342778
Slk	STE20-like serine/threonine-protein kinase	484		1	-0.54947	0.213424	0.812298	-0.313598	0.514318	0.290628	0.103668	0.275959	-0.227669	-0.708631
Bnip3	BCL2/adenovirus E1B 19 kDa protein-interacting protein 3	79		1	-0.611442	-0.506767	0.352427	0.199398	0.659114	-0.336137	0.55993	0.381071	0.356879	-0.788297
Bnip3	BCL2/adenovirus E1B 19 kDa protein-interacting protein 3	88		0.932297	-0.467019	-0.614153	-0.37533	-0.274995	-0.0153093	0.726156	0.819693	0.454906	0.427751	-0.727975
Pgrmc1	Membrane-associated progesterone receptor component 1	181		1	-0.441106	-0.0871898	0.127996	-0.0451801	0.277683	0.30656	0.013565	0.366697	0.317666	-0.753678
Impa1	Inositol monophosphatase 1	37		1	-0.455488	0.515987	-0.197512	-0.391894	0.212812	0.282328	0.201934	-0.0575773	0.291821	-0.219105
Impa1	Inositol monophosphatase 1	38		1	-0.424212	-0.197413	0.155527	-0.244638	-0.286266	0.738381	-0.021714	-0.208375	0.789783	-0.388538
Bckdk	[3-methyl-2-oxobutanoate dehydrogenase [lipoamide]] kinase, mitochondrial	31		0.896184	-0.169525	-0.701543	-0.110155	0.131686	0.681373	-0.505322	-0.884713	0.774395	0.529938	0.000107816
Copb2	Coatomer subunit beta'	859		0.691927	-0.820321	0.147266	-0.00177771	0.335797	-0.455887	-0.985919	0.369326	0.931709	0.0355079	0.459031
Copb2	Coatomer subunit beta'	860		1	-0.0810042	-0.386662	0.186674	0.299661	0.0889678	0.768424	-0.517941	0.0560794	-0.0359802	-0.535459
Nck2	Cytoplasmic protein NCK2	90		1	-0.0126854	-1.0162	0.34791	0.0695914	-0.000649611	-0.511178	0.544532	-0.0510916	0.573839	0.024832
Impact	Protein IMPACT	137		1	0.212476	0.29413	0.456792	0.0698933	0.232466	-0.152798	-0.160165	-0.107363	-0.337192	-0.302433
Stk10	Serine/threonine-protein kinase 10	449		1	-0.16266	-0.625571	0.748742	0.209585	0.43533	-0.15316	-0.388522	0.0989628	0.135967	-0.256179
Stk10	Serine/threonine-protein kinase 10	515		0.933233	0.602083	-0.670732	-0.537113	-0.133754	0.210143	-0.35996	0.155721	0.315648	0.871212	-0.663744
Stk10	Serine/threonine-protein kinase 10	13		0.71991	-0.976348	-0.62681	-0.730638	-0.505978	0.338579	0.255761	0.112264	0.817434	0.645384	0.4437
Stk10	Serine/threonine-protein kinase 10	437		0.983409	0.127377	-1.00686	0.67585	-0.397997	-0.559269	0.640535	-0.0477328	-0.316702	0.200152	0.450148
Stk10	Serine/threonine-protein kinase 10	20		0.89984	0.374568	0.724663	0.205584	0.378815	-0.0898736	0.624882	-0.147655	-0.490653	-0.468864	-0.938287
Strn	Striatin	245		1	-0.283935	-0.393218	0.239865	0.393812	0.585607	0.61382	0.992603	-0.260041	-0.369772	-1.16253
2007-09-01	Septin-7	422		0.999864	-0.58248	-0.0589175	-1.01	-0.392805	0.278385	-0.327455	0.114832	0.456813	0.611081	0.741618
2007-09-01	Septin-7	333		1	-0.426619	-0.0200632	0.0809071	0.579187	0.375028	0.0998511	0.340142	-0.1193	-0.61369	-0.10144
Eif6	Eukaryotic translation initiation factor 6	175		0.932129	-0.53899	-1.1215	0.337404	-0.299407	0.175352	0.505455	-0.618844	0.302319	0.722813	0.228503
Atp2a2	Sarcoplasmic/endoplasmic reticulum calcium ATPase 2	663		0.987778	0.16177	0.129365	0.290409	0.109815	-1.59989	0.28882	0.333943	0.201375	0.20566	-0.33281
Supt5h	Transcription elongation factor SPT5	664		1	-0.595522	0.331198	0.192569	-0.545746	0.452246	0.392634	0.326689	0.326438	0.172098	-0.726929
Ilk	Integrin-linked protein kinase	186		1	-0.212725	-0.47352	0.458027	-0.338124	0.31713	-0.0481415	0.0105982	0.612385	-0.132235	-0.115336
Chkb	Choline/ethanolamine kinase	40		1	-0.365932	0.452472	0.00472631	-0.36899	0.0703441	-0.628787	1.07824	-0.389809	0.380007	0.169171
Ncf2	Neutrophil cytosol factor 2	315		0.386022	1.01996	0.362401	0.409145	-0.519113	0.425571	0.536509	-1.00613	0.164242	-0.779396	-0.565446
Ncf2	Neutrophil cytosol factor 2	323		0.845957	-0.319899	1.08913	-0.367244	-0.575506	-0.420805	-0.404572	0.609195	0.510356	-0.304764	0.411678
Ncf2	Neutrophil cytosol factor 2	324		1	-0.414384	0.770823	-0.4284	-0.65805	-0.38639	0.0944082	0.418243	0.254404	0.232409	0.210506
Ncf2	Neutrophil cytosol factor 2	385		1	-0.440871	-0.314831	0.178519	0.134218	-0.354072	0.436401	0.240937	0.415896	0.263162	-0.621722
Ncf2	Neutrophil cytosol factor 2	332		1	-0.254336	-0.829555	-0.0959995	-0.344538	0.0206272	-0.422786	0.142198	0.768909	0.413941	0.410857
Ncf2	Neutrophil cytosol factor 2	398		1	-0.157786	0.264319	1.12742	0.108227	-0.516881	0.41172	0.323668	-0.423395	-0.388078	-0.449579
Pip5k1c	Phosphatidylinositol 4-phosphate 5-kinase type-1 gamma	475		0.9695	-0.284437	0.278147	0.814032	-0.792415	0.63649	0.203506	0.338077	-0.976778	-0.019974	0.320039
Pip5k1c	Phosphatidylinositol 4-phosphate 5-kinase type-1 gamma	554		0.997419	-0.336662	-0.754758	-0.843517	0.334197	0.372734	0.36166	0.397875	-0.437188	0.325516	0.373226
Pip5k1c	Phosphatidylinositol 4-phosphate 5-kinase type-1 gamma	555		0.742557	-0.183334	1.24769	-1.03013	0.624335	-0.446012	-0.121448	0.033192	0.374093	-0.0809408	-0.466263
Eif3d	Eukaryotic translation initiation factor 3 subunit D	161		1	-0.014279	-0.107661	0.388345	0.238516	0.380893	0.262575	0.264858	0.286042	-0.620065	-0.847615
Eef1b	Elongation factor 1-beta	106		1	-0.188718	-0.269971	0.570469	-0.182216	0.62816	0.478281	0.606982	-0.764634	-0.207803	-0.286641
Eef1b	Elongation factor 1-beta	83		1	-0.408952	-0.210845	-0.276142	0.350516	-0.200261	0.273294	0.0323091	-0.0184545	-0.255286	0.550087
Dgcr14	Protein DGCR14	295		1	-0.137778	-0.257822	0.651961	0.00470114	0.00135062	-0.343299	-0.0759287	0.399276	-0.00950526	-0.153066
Atxn2	Ataxin-2	741		1	-0.356679	0.186481	0.0517058	-0.527893	0.00513354	0.221114	0.223045	-0.166729	0.418139	0.0622725
Atxn2	Ataxin-2	297		0.899746	-0.301285	-0.184507	-1.22035	-0.152167	-0.367134	0.63913	0.659943	0.273443	0.587248	-0.212332
Atxn2	Ataxin-2	836		1	-0.488637	-0.252925	0.585124	0.190678	0.538352	0.234095	-0.1927	-0.33135	-0.162824	0.0496513
Atxn2	Ataxin-2	435		1	-0.205883	0.0762925	0.24009	-0.187787	-0.00591191	-0.264327	-0.291109	0.35846	-0.122994	0.40801
Nmt1	Glycylpeptide N-tetradecanoyltransferase 1	69		1	0.0393614	0.136406	0.545536	0.371753	-0.126447	-0.506941	-0.0969374	0.258189	-0.964222	0.457942
Nmt1	Glycylpeptide N-tetradecanoyltransferase 1	47		1	-0.895409	0.126391	-0.994698	0.225739	0.157545	0.237009	0.216267	0.285445	0.295594	0.222492
Nmt2	Glycylpeptide N-tetradecanoyltransferase 2	66		0.602171	1.15232	0.158509	-1.07352	-0.978829	0.417829	0.564244	-0.150949	-0.174037	-0.0936452	0.0160437
Nmt2	Glycylpeptide N-tetradecanoyltransferase 2	68		1	0.19735	0.253547	0.317802	0.0795908	-0.305883	-0.871982	-0.140293	0.161362	-0.0440144	0.383815
Nmt2	Glycylpeptide N-tetradecanoyltransferase 2	38		0.974746	0.160629	-0.13395	-1.70094	0.275626	0.257218	0.241322	0.134507	0.16553	0.162261	0.0770047
Epb41l2	Band 4.1-like protein 2	201		0.899383	-0.232565	0.285098	-0.377357	-0.360252	0.000775996	0.617966	-1.35588	0.571086	0.553902	-0.0646102
Epb41l2	Band 4.1-like protein 2	116		1	-0.549911	-0.274137	-0.156688	-0.631528	-0.037174	0.0601876	-0.0447237	0.435737	0.739576	0.33048
Epb41l2	Band 4.1-like protein 2	698		0.932066	-0.0449548	-1.59882	-0.01508	0.0903043	0.314244	-0.0752966	-0.203814	0.129748	0.552186	0.475613
Epb41l2	Band 4.1-like protein 2	38		1	-0.101972	0.00413731	0.205505	0.26296	0.190106	0.104569	0.434493	0.468692	-0.51455	-0.84538
Epb41l2	Band 4.1-like protein 2	46		1	0.0745982	0.439344	-0.175847	0.0943608	0.509754	0.38118	-0.356678	0.0495993	0.410274	-1.32244
Epb41l2	Band 4.1-like protein 2	492		1	0.194247	-0.0370487	0.127831	0.129997	-0.522745	0.339344	-0.177262	0.0487406	0.139099	-0.394509
Epb41l2	Band 4.1-like protein 2	86		1	-0.726861	-0.483938	0.205078	-0.234469	0.689714	-0.29827	0.214826	0.161523	0.611807	0.0170117
Cbfa2t2	Protein CBFA2T2	400		0.870253	0.332985	0.437408	-0.32822	0.371234	-0.368365	-1.18671	0.161558	0.630371	-0.471879	0.397214
Emc8	ER membrane protein complex subunit 8	100		1	0.307203	-0.43428	0.109956	-0.126357	0.645941	0.281508	0.368061	0.176207	-0.14757	-1.00825
Vamp8	Vesicle-associated membrane protein 8	55		1	-0.220005	-0.106368	0.276135	0.453878	0.815076	0.128347	0.0345145	0.200727	-0.540744	-0.786722
Vamp8	Vesicle-associated membrane protein 8	18		1	-0.650733	-0.0085715	0.686893	0.101801	0.159014	-0.212311	0.275985	0.0844591	-0.261428	0.103223
Ulk1	Serine/threonine-protein kinase ULK1	715		0.816293	-1.32933	-0.105768	0.572513	0.0755764	-0.0043364	-0.227795	0.768517	0.747618	0.115155	-0.304418
Ulk1	Serine/threonine-protein kinase ULK1	757		1	-0.311127	0.0967468	-0.589331	-0.0627082	0.70819	-0.626127	0.311079	0.45751	0.113517	0.0339221
Ulk1	Serine/threonine-protein kinase ULK1	450		0.243878	-1.35161	-0.263252	0.0339598	-0.606466	-0.711352	-0.0944828	1.23095	0.643921	0.613826	0.577081
Ulk1	Serine/threonine-protein kinase ULK1	555		1	-0.11711	-0.8598	-0.540756	-0.164439	0.319961	0.351001	0.761137	0.387937	-0.149386	-0.0684101
Ulk1	Serine/threonine-protein kinase ULK1	622		0.932322	-1.22693	-0.567995	0.212247	-0.230122	0.074763	-0.0547408	0.961354	0.469143	0.253236	0.279142
Ulk1	Serine/threonine-protein kinase ULK1	637		1	0.0818575	-0.0292579	0.354101	0.246875	0.597985	-0.23703	0.418546	-0.356892	0.101091	-0.841931
Ulk1	Serine/threonine-protein kinase ULK1	521		0.973413	-0.251142	-0.504755	0.356848	-0.120475	-1.42133	-0.0903613	0.834273	0.371851	0.496812	0.144537
Stx7	Syntaxin-7	126		0.903913	0.279322	-0.143693	0.106966	0.671777	-0.0815645	-0.170996	-0.666364	-0.728252	-0.365789	0.90243
Stx7	Syntaxin-7	129		1	-0.836744	-0.304598	-0.632462	-0.217184	-0.249866	-0.0649983	0.913738	0.632336	0.613167	0.0783155
Stx7	Syntaxin-7	205		1	-0.0529603	0.229145	0.32021	-0.480025	-0.00778211	-0.297235	0.615504	-0.519145	-0.109871	0.591428
Stx7	Syntaxin-7	75		1	0.364455	0.126279	0.491094	-0.181422	0.051665	0.450665	0.18311	-0.417303	-0.769325	-0.0861812
Stx7	Syntaxin-7	45		0.677805	0.296141	-1.44139	-0.630431	0.080452	0.60556	0.943255	-0.126255	-0.431404	0.462429	-0.156488
Slc16a7	Monocarboxylate transporter 2	482		1	-0.505678	-0.103813	0.23651	0.273133	0.405407	0.369046	0.310226	-0.480629	-0.227129	-0.0649895
Dok2	Docking protein 2	124		1	-0.376987	-0.774434	-0.160546	-0.247543	0.540039	-0.0578957	-0.215806	0.720156	0.64317	-0.22284
Tmem131;Aurkaip1	Transmembrane protein 131;Aurora kinase A-interacting protein	1645;51		0.986325	0.0534992	0.147764	0.0542357	0.393759	0.584716	0.385414	-1.31242	0.458805	-0.698503	-0.198694
Tmem131	Transmembrane protein 131	1371		1	0.164819	0.30469	-0.494319	0.340575	0.505086	0.250969	0.252832	-0.616364	-0.797465	0.23125
Tmem131	Transmembrane protein 131	1153		0.938809	-0.496905	0.289963	0.706427	-0.848729	-0.157333	0.466238	0.535024	0.0414404	0.475024	-0.667628
Tmem131	Transmembrane protein 131	1244		0.711822	-1.03994	0.421874	-0.720173	0.0509694	0.495348	0.310944	0.648549	0.628509	0.368963	-0.953648
Vamp4	Vesicle-associated membrane protein 4	88		1	0.589961	0.201449	-0.364149	0.393035	-0.522939	-0.227231	-0.711615	0.52676	0.34923	-0.583815
Vamp4	Vesicle-associated membrane protein 4	30		1	-0.111346	-0.211239	0.47867	0.276032	0.734972	-0.0607238	0.170504	-0.0427318	-0.455984	-0.484927
Snx12	Sorting nexin-12	27		1	0.116734	-0.334912	-0.368311	0.0920541	-0.43726	-0.158302	0.474954	0.868717	0.290333	-0.710389
Sp3	Transcription factor Sp3	72		1	-1.08162	-0.0950578	0.118944	0.323965	-0.00393191	0.38918	0.602856	0.268789	0.0305951	-0.398017
Clcn7	H(+)/Cl(-) exchange transporter 7	799		1	-0.351993	-0.427348	0.328383	-0.537934	0.328934	0.212491	0.619727	0.41785	0.327478	-0.705163
Kdm6a	Lysine-specific demethylase 6A	769		0.995019	-0.654156	-0.0601812	0.606248	0.273909	0.327961	0.319021	0.958385	-0.0806265	-0.586787	-0.645671
Srpk1	SRSF protein kinase 1	450		1	-0.356878	-0.0907555	-0.300133	0.0303287	0.526238	0.141523	0.158803	0.221254	0.369861	-0.626703
Srpk1	SRSF protein kinase 1	309		0.990372	-0.499217	0.131389	-0.432037	0.578656	0.22746	-0.497881	0.489576	-0.231357	0.918717	-0.581207
Srpk1	SRSF protein kinase 1	311		0.748281	0.102648	0.0210965	-0.612984	-0.977686	0.762967	0.748966	0.658919	-0.291692	0.203865	-0.408599
Ttc3	E3 ubiquitin-protein ligase TTC3	1060		1	-0.279299	-0.323916	-0.269743	0.400457	-0.622968	0.360666	0.346223	0.283806	0.254327	-0.367155
Cfdp1	Craniofacial development protein 1	203		0.898395	-0.342377	0.267083	0.853173	-0.12634	-0.814002	0.691533	0.788896	-0.219273	-0.00416044	-0.820745
Wiz	Protein Wiz	1029		0.746166	0.0792369	0.363268	0.158417	0.092457	-0.906439	-0.78133	1.51138	0.233678	-0.334848	-0.13416
Wiz	Protein Wiz	1370		1	-0.340346	0.32702	-0.09288	0.133925	0.184357	0.364221	-0.388218	0.139138	0.0807672	-0.400415
Wiz	Protein Wiz	1039		1	-0.410997	0.339706	0.122172	-0.0323365	-0.229102	-0.094972	0.381663	0.225707	0.182368	-0.330599
Ikbkb	Inhibitor of nuclear factor kappa-B kinase subunit beta	672		1	0.18524	0.133141	-0.770595	-0.357953	0.116003	0.186008	-0.385516	0.446506	0.483357	-0.262932
Baz1a	Bromodomain adjacent to zinc finger domain protein 1A	1339		0.931071	-1.11388	0.151202	-0.108893	0.396409	0.219795	0.531616	0.415165	-0.121983	0.557856	-0.757973
Vti1b	Vesicle transport through interaction with t-SNAREs homolog 1B	138		1	-0.813554	0.596364	0.678866	-0.502238	0.251524	-0.360949	0.454211	0.0934196	-0.0212353	0.118833
Tulp3	Tubby-related protein 3	126		0.896125	-0.805605	0.0293425	0.738234	-0.322157	-0.111791	-0.00444059	0.30972	-0.162865	-0.468144	1.03908
Tulp3	Tubby-related protein 3	372		1	0.0308489	-1.14737	0.67774	-0.0226073	-0.0640102	-0.0656439	0.250359	0.61406	-0.234745	-0.109452
Klc1	Kinesin light chain 1	162		1	-0.383216	-0.764488	0.470771	-0.0315976	0.146448	0.369299	0.360337	0.148684	0.0919103	-0.354881
Klc1	Kinesin light chain 1	523		0.978224	-1.16336	0.392831	-0.565476	0.380953	0.675967	0.0994079	-0.21396	0.0403102	0.0253039	0.400362
Klc1	Kinesin light chain 1	459		1	-0.498877	0.31219	-0.591771	-0.380889	0.218402	0.693809	0.275841	0.196092	0.501035	-0.672165
Klc2	Kinesin light chain 2	574		1	-0.282458	-0.354113	0.627551	-0.136838	0.715454	0.468989	0.121255	-0.300705	-0.19966	-0.381939
Klc2	Kinesin light chain 2	575		1	-0.103389	-0.278233	0.7172	-0.466072	0.623131	0.379198	0.135876	0.237504	-0.191432	-0.754289
Znf106	Zinc finger protein 106	1381		0.92876	-0.489198	0.429799	0.407784	-1.02866	-0.233051	0.514916	-0.54051	0.443011	0.318027	0.193888
Znf106	Zinc finger protein 106	909		0.903149	-0.552142	0.0957609	0.970904	0.980144	-0.169846	-0.659224	0.150136	-0.260014	-0.0966651	-0.197316
Znf106	Zinc finger protein 106	1339		0.783826	0.442313	0.485091	-1.42937	0.0358049	-0.696097	-0.253079	0.396692	0.696473	0.162542	-0.151289
Znf106	Zinc finger protein 106	878		1	-0.172389	-0.574687	0.1592	0.0316819	-0.667182	-0.660879	0.594709	0.67928	0.0317085	0.456568
Dync1i2	Cytoplasmic dynein 1 intermediate chain 2	51		1	0.239459	0.171464	0.00329224	0.567001	-0.0134756	-0.280996	0.187496	-0.480142	-0.0152538	-0.291649
Dync1i2	Cytoplasmic dynein 1 intermediate chain 2	81		0.563821	-0.648353	-1.17654	-0.323043	-0.21494	-0.189058	-0.225673	0.254352	0.904041	0.68144	0.579203
Dync1i2	Cytoplasmic dynein 1 intermediate chain 2	98		0.379676	-1.44815	-0.239276	-0.999382	0.578907	-0.105743	0.520195	0.549511	0.669427	0.384509	-0.108718
Nsd1	Histone-lysine N-methyltransferase, H3 lysine-36 and H4 lysine-20 specific	2369		1	0.556308	0.16493	0.558401	-0.401985	-0.0918772	-0.728445	-0.338264	0.497533	0.370459	-0.513763
Nsd1	Histone-lysine N-methyltransferase, H3 lysine-36 and H4 lysine-20 specific	383		1	0.0497156	0.112958	-0.239043	0.207664	0.0145757	-0.0969888	-0.311147	0.482076	0.0439212	-0.369396
Pde8a	High affinity cAMP-specific and IBMX-insensitive 3',5'-cyclic phosphodiesterase 8A	694		0.291782	-1.24416	-0.607091	-0.624226	-0.119412	0.351658	-0.576969	1.29876	0.639368	0.515403	0.471443
Pde8a	High affinity cAMP-specific and IBMX-insensitive 3',5'-cyclic phosphodiesterase 8A	452		1	-0.197082	0.254713	0.741167	-0.0953896	0.0132723	-0.0206674	0.0141007	0.182879	0.292291	-0.92947
Pde8a	High affinity cAMP-specific and IBMX-insensitive 3',5'-cyclic phosphodiesterase 8A	18		1	-0.928621	0.0688162	0.194714	-0.214602	-0.162292	0.326689	0.0997627	0.596047	0.0276631	0.0420726
Dnmt3a	DNA (cytosine-5)-methyltransferase 3A	4		1	0.0375585	0.0360192	0.14784	-0.582928	-0.669465	0.194363	0.588933	0.0767525	0.175972	0.020787
Dnmt3a	DNA (cytosine-5)-methyltransferase 3A	102		1	0.124945	0.044618	0.189186	0.180946	-0.0379145	-1.12456	0.325542	0.325178	0.0278884	0.0745318
Dnmt3a	DNA (cytosine-5)-methyltransferase 3A	239		1	0.148525	-0.79894	-0.546228	0.311791	0.392064	0.783472	-0.230897	-0.458596	0.0709835	0.0318258
Dnmt3a	DNA (cytosine-5)-methyltransferase 3A	251		0.806958	-0.360758	-0.133946	-0.154629	0.0725077	-1.55451	0.0809032	0.708212	0.684184	0.478531	-0.104216
Zfr	Zinc finger RNA-binding protein	1054		0.15313	-0.636302	-0.896358	-0.105814	-0.421635	-0.958915	-0.788944	1.04593	1.08285	0.971248	0.479154
Men1	Menin	544		1	-0.842164	0.0763657	0.755226	0.0335052	0.252244	-0.195136	0.0315118	0.276451	-0.14795	0.0387826
Men1	Menin	487		0.637501	0.316693	-0.487645	0.170325	-0.076935	-0.0613133	-0.643673	1.96354	-0.232457	-0.168834	-0.383476
Hnrnpa2b1	Heterogeneous nuclear ribonucleoproteins A2/B1	225		1	-0.203581	0.0639737	-0.227034	0.494536	0.378084	0.320493	0.233473	-0.645194	-0.494464	0.191838
Hnrnpa2b1	Heterogeneous nuclear ribonucleoproteins A2/B1	212		1	0.286823	0.200766	0.254927	0.35646	-0.713279	-0.029035	-0.695389	-0.0298236	0.00609268	0.124214
Aff1	AF4/FMR2 family member 1	382		0.743343	-0.397568	-0.284297	0.227278	0.345839	0.948439	-1.60136	0.802599	-0.122214	0.1931	0.311692
Aff1	AF4/FMR2 family member 1	293		0.692568	-0.154015	0.231941	1.15016	-0.293003	1.09465	-0.626603	-0.500399	0.599629	-0.517073	-0.491193
Aff1	AF4/FMR2 family member 1	132		1	-0.320182	-0.378938	0.67994	0.355104	0.714696	-0.449612	-0.410323	-0.177232	-0.334908	0.472798
Sap30	Histone deacetylase complex subunit SAP30	131		1	0.0231999	0.369812	0.220027	-0.453882	0.192144	0.236258	-0.242206	0.715873	-0.435633	-0.490649
Comt	Catechol O-methyltransferase	261		0.746804	0.332668	-0.22843	-0.492904	-0.708978	0.436422	0.565521	-1.21092	0.652094	-0.0529277	0.333499
Becn1	Beclin-1	63		1	-0.0180685	0.114342	0.371481	0.24163	-0.283146	-0.319425	-0.107043	0.605123	0.298774	-0.879758
Parg	Poly(ADP-ribose) glycohydrolase	135		0.938226	0.739217	-0.694189	-0.958526	-0.399912	0.352885	0.070103	0.276436	0.386037	0.590428	-0.618328
Parg	Poly(ADP-ribose) glycohydrolase	286		1	0.0315986	-0.4727	0.196927	0.00395741	-0.268783	0.165605	0.340797	0.225065	0.202949	-0.476357
Parg	Poly(ADP-ribose) glycohydrolase	195		0.649371	-0.754818	-0.426404	-0.503939	-0.0506152	-0.383589	0.112266	1.77938	0.0729628	0.261999	0.00911778
Pak1	Serine/threonine-protein kinase PAK 1	144		0.955694	-0.105334	-0.201879	0.258575	0.568736	0.839155	0.664815	-1.00872	0.181487	-0.188413	-1.03664
Brd7	Bromodomain-containing protein 7	279		1	-0.344332	-0.163367	-0.168856	0.179695	-1.09675	-0.0198561	-0.0599722	0.501612	0.827921	-0.028328
Psmc3	26S protease regulatory subunit 6A	12		0.270531	-0.188053	-0.637625	0.219048	-0.240744	0.178833	-0.463595	2.23596	-0.188145	-0.0674431	-0.349185
Bsn	Protein bassoon	3022		1	-0.680776	0.102825	0.803766	0.469965	-0.127493	0.0640124	-0.303853	0.526136	-0.597341	-0.138429
Bsn	Protein bassoon	3512		1	-0.607573	-0.159342	0.347631	0.475698	0.615887	-0.0633033	-0.2501	-0.119082	-0.0775305	-0.0237665
Birc6	Baculoviral IAP repeat-containing protein 6	452		1	-0.100002	0.33769	-0.32084	0.176437	0.125867	0.705241	-1.21667	0.478523	0.00986508	-0.464601
Birc6	Baculoviral IAP repeat-containing protein 6	3613		1	-0.504292	-0.508636	0.305356	0.24636	-0.302075	-0.660356	0.117999	0.693045	0.330193	0.185567
Birc6	Baculoviral IAP repeat-containing protein 6	483		1	-0.0294515	0.13901	-1.39657	0.263003	0.486061	0.209932	0.190116	0.0361068	-0.0904205	0.0468639
Birc6	Baculoviral IAP repeat-containing protein 6	493		1	-0.466388	-0.128517	-0.624147	0.345231	-0.00656876	-0.429983	0.213537	0.452888	0.480788	0.0267349
Birc6	Baculoviral IAP repeat-containing protein 6	593		1	0.138332	0.290481	-0.107722	-0.724237	-0.062665	0.354489	-0.213372	0.617117	0.243508	-0.55925
Birc6	Baculoviral IAP repeat-containing protein 6	580		0.736336	0.442034	-0.821331	1.46304	0.453849	-0.0629513	0.143407	-0.151105	0.00976186	-0.621611	-0.748184
Birc6	Baculoviral IAP repeat-containing protein 6	2978		1	-0.672309	0.254955	0.0911923	-0.148126	0.380845	0.23372	-0.114095	-0.219088	0.122403	0.223727
Tom1	Target of Myb protein 1	462		0.678954	-0.793342	-0.199802	0.507648	0.258784	0.088644	-0.360432	1.5253	-0.493356	0.242073	-0.295069
Tom1	Target of Myb protein 1	472		0.991771	-0.560575	-0.427421	-0.0361168	0.411806	0.429805	0.653791	-0.991388	0.492768	-0.15877	-0.0701782
Tom1	Target of Myb protein 1	359		1	-0.455085	-0.566377	0.442741	0.245826	-0.224551	-0.300174	0.262174	-0.156861	0.354913	0.375892
Tom1	Target of Myb protein 1	405		0.935928	0.199042	-0.568948	-0.997351	0.384532	0.143182	0.263758	1.07174	-0.133109	0.230051	-0.680741
Tom1	Target of Myb protein 1	176		0.979514	0.288763	-0.240624	-0.0933014	-0.040061	-1.32048	-0.316242	0.838057	-0.0616447	0.469777	0.271666
Adam15	Disintegrin and metalloproteinase domain-containing protein 15	810		1	-0.968001	-0.643021	-0.459405	0.0533465	0.366562	0.0678222	0.125075	0.599847	0.59337	0.111706
Fgd3	FYVE, RhoGEF and PH domain-containing protein 3	442		0.985001	-0.164143	-0.159308	0.873613	0.203059	0.185513	0.368986	0.863716	-0.526423	-0.531191	-0.672939
Akap10	A-kinase anchor protein 10, mitochondrial	52		1	0.0305768	-0.0176093	0.161111	0.118783	-0.659404	-0.42986	-0.535243	0.065522	0.538475	0.464862
Akap10	A-kinase anchor protein 10, mitochondrial	187		1	-0.692686	0.448413	-0.283528	-0.00292354	0.12092	0.245953	-0.641081	0.0955455	-0.104601	0.725169
Tspyl1	Testis-specific Y-encoded-like protein 1	3		0.159683	0.26632	-1.3611	0.309599	0.639225	0.584795	0.447625	-1.11675	-1.03897	0.325212	0.548185
Ccnk	Cyclin-K	341		1	-0.0409095	-0.610441	-0.112866	-0.0372113	0.210077	0.283102	0.304283	-0.26397	0.536345	-0.320644
Ccnk	Cyclin-K	9		0.84592	-1.14932	0.0968014	0.424531	-0.428994	0.39796	0.331596	0.646055	0.649953	-0.107216	-0.470025
Ccnk	Cyclin-K	325		1	-0.240246	0.263389	0.0222278	-0.77832	-0.0882112	-0.451811	0.334599	0.526472	0.143804	0.401099
Ccnk	Cyclin-K	329		1	-0.0657507	0.00995985	-0.0367059	0.629915	0.36259	0.429825	-0.173413	-0.365675	0.149101	-0.899238
Zfand5	AN1-type zinc finger protein 5	48		1	0.0125879	-0.371144	0.149383	0.359376	0.131964	-1.13994	0.249424	-0.00642879	0.2109	0.443784
Apaf1	Apoptotic protease-activating factor 1	790		0.569865	-0.882303	-0.388686	-0.593519	-0.653756	0.12313	-0.294797	0.940716	0.628511	0.90295	0.238165
Pias1	E3 SUMO-protein ligase PIAS1	503		1	-0.518497	-0.342753	0.686697	-0.329246	0.436349	0.661866	-0.102269	-0.403245	-0.00395506	0.08456
Syn1	Synapsin-1	510		0.39684	0.00602602	-0.765039	0.335908	-0.509364	0.338679	0.304419	1.08094	0.243707	-1.30811	0.52046
Syn1	Synapsin-1	568		1	-0.289107	-0.0836484	-0.207544	-0.545427	0.91534	0.571656	0.362495	0.253133	0.0345451	-0.764782
Zbtb7a	Zinc finger and BTB domain-containing protein 7A	331		0.8126	-0.261716	-1.3705	0.414319	0.435645	-0.520095	0.405265	0.347754	-0.431358	0.362575	0.335978
Zbtb7a	Zinc finger and BTB domain-containing protein 7A	537		1	0.22955	0.353124	0.221987	0.119615	-1.38083	0.28569	0.457583	0.0274174	-0.683088	0.281914
Sh3pxd2a	SH3 and PX domain-containing protein 2A	1029		1	-0.627776	-0.288214	0.103221	-0.579428	-0.111021	0.245495	0.699511	0.0151549	0.550431	0.0934998
Sh3pxd2a	SH3 and PX domain-containing protein 2A	1034		1	0.118154	0.00771265	0.189385	0.328706	0.758644	-0.223698	0.269497	0.343864	-0.653727	-0.832228
Sh3pxd2a	SH3 and PX domain-containing protein 2A	420		1	0.00588807	0.015425	0.341483	0.267301	-1.13196	0.131169	0.166098	0.179025	-0.0824315	-0.0442326
Sh3pxd2a	SH3 and PX domain-containing protein 2A	993		0.970689	-0.644015	-0.845672	0.364044	0.103725	1.23846	0.275471	0.266879	0.00822834	-0.158214	-0.352975
Sh3pxd2a	SH3 and PX domain-containing protein 2A	1008		1	-0.0610978	-0.35738	0.395103	0.12266	0.630267	0.0916616	0.211368	-0.88746	0.0535435	0.0211745
Sh3pxd2a	SH3 and PX domain-containing protein 2A	592		1	-0.308801	0.0933744	0.579704	0.295077	0.717159	-0.0408971	0.143291	-0.000902064	-0.924659	-0.169964
Sh3pxd2a	SH3 and PX domain-containing protein 2A	721		1	-0.35536	0.190059	-0.421866	-0.178633	0.706152	-0.123969	-0.175467	0.0214177	-0.00350416	0.41589
Cope	Coatomer subunit epsilon	13		1	-0.628514	-0.731399	0.462177	-0.325525	0.233349	0.67055	0.384518	0.60841	-0.337082	-0.249324
Pde4a	cAMP-specific 3',5'-cyclic phosphodiesterase 4A	161		1	0.230334	0.0104328	0.33705	-0.270232	0.356792	0.1988	0.210372	0.0740276	-0.711018	-0.207897
Sp1	Transcription factor Sp1	2		1	0.292351	-0.283459	0.409447	-0.0828786	0.184545	0.162194	0.502857	0.148433	-0.365833	-0.764308
Sp1	Transcription factor Sp1	7		0.996646	-0.651427	0.379941	0.881929	-0.191826	-0.224122	0.800963	-0.192685	0.0696692	-0.685556	0.0243797
Casp8	Caspase-8;Caspase-8 subunit p18;Caspase-8 subunit p10	188		1	-0.356943	-0.457964	-0.383771	0.466216	0.558223	-0.31544	0.394229	0.227059	-0.372445	0.268516
H2-L	H-2 class I histocompatibility antigen, L-D alpha chain;H-2 class I histocompatibility antigen, alpha chain	353;163		0.99495	-0.200128	0.352683	0.0879605	-0.74915	0.440319	0.928006	0.137882	-0.280095	0.183823	-0.646589
H2-K1	H-2 class I histocompatibility antigen, K-B alpha chain	367		1	0.197922	-0.728442	-0.0399351	-0.480276	0.267933	0.119821	-0.0392374	0.369434	0.180257	0.0176028
H3f3a;H3f3c;Hist1h3a;Hist1h3b	Histone H3.3;Histone H3.3C;Histone H3.1;Histone H3.2	58;58;58;58		1	0.162441	0.191544	0.150366	-0.389797	0.594562	0.266648	0.199543	0.0174501	-0.000931847	-0.907822
Mbp	Myelin basic protein	112		0.834791	-0.0796655	-0.178185	0.717305	-0.491424	0.724451	-0.816413	-0.391427	-0.323912	0.288838	0.768467
Mbp	Myelin basic protein	114		0.559631	-0.348222	0.043552	-0.784609	0.356172	-0.725549	0.666209	1.23162	0.363298	-0.162267	-0.698951
Mbp	Myelin basic protein	96		1	-0.312537	0.224766	0.005216	0.373104	0.430472	0.481711	-0.275476	0.247863	-0.485145	-0.593729
Mbp	Myelin basic protein	43		1	-0.429113	-0.503201	0.135879	-0.779262	0.249979	0.449361	0.766874	0.393491	0.154081	-0.275706
Cd74	H-2 class II histocompatibility antigen gamma chain	9		1	0.0858944	-1.34727	0.552848	0.0599303	-0.0133873	0.0891848	0.197566	0.050502	0.207889	-0.0357189
Araf;Raf1	Serine/threonine-protein kinase A-Raf;RAF proto-oncogene serine/threonine-protein kinase	580;621		1	-0.145938	-0.532436	0.245233	-0.283097	0.280351	-0.190638	0.420365	0.573315	0.139717	-0.403494
Aldoa;Aldoart2	Fructose-bisphosphate aldolase A;Fructose-bisphosphate aldolase	36;36		0.669639	0.0338681	-0.183369	0.497822	-1.70669	0.377612	0.210657	0.588399	0.324755	0.235074	-0.05801
Aldoa;Aldoart2	Fructose-bisphosphate aldolase A;Fructose-bisphosphate aldolase	39;39		1	0.0115284	-0.256674	0.373314	0.167769	0.545221	0.293362	-1.43115	0.221597	0.16031	-0.277596
Aldoa;Aldoart1;Aldoart2	Fructose-bisphosphate aldolase A;Fructose-bisphosphate aldolase	46;101;46		0.85166	-0.077866	-0.0298395	0.527643	0.172057	0.379158	0.217179	0.432365	0.307032	-0.0937733	-1.50662
Aldoa	Fructose-bisphosphate aldolase A	272		0.310794	-0.377573	-0.82216	-0.0767115	-0.976684	0.934851	1.26652	-0.3067	-0.329555	0.687608	-0.067278
Prkaca	cAMP-dependent protein kinase catalytic subunit alpha	339		0.884445	-0.97636	-0.246044	0.250211	-0.105355	0.199085	0.52829	-0.985821	0.513329	0.474698	0.152325
Tuba1b;Tuba1c;Tuba8;Tuba4a	Tubulin alpha-1B chain;Tubulin alpha-1C chain;Tubulin alpha-8 chain;Tubulin alpha-4A chain	232;232;232;232		0.719155	0.382978	0.720483	0.382204	-0.40378	-0.41417	0.157475	0.641806	0.336456	0.054821	-1.52569
Tuba1b;Tuba1a;Tuba1c;Tuba3a	Tubulin alpha-1B chain;Tubulin alpha-1A chain;Tubulin alpha-1C chain;Tubulin alpha-3 chain	48;48;48;48		1	-0.055824	0.250702	-0.120214	-0.00356488	-0.199691	-0.158925	-0.068061	0.321961	0.0661351	-0.0668341
Src	Neuronal proto-oncogene tyrosine-protein kinase Src	17		0.889312	-0.729595	0.385684	-0.415107	-0.803197	0.192018	0.490689	-0.238272	-0.159095	0.491998	0.765957
Itgam	Integrin alpha-M	853		1	-0.698634	0.299754	-0.212122	-0.250381	-0.0975011	0.411123	0.44207	0.217788	-0.17209	0.168044
Jun;Jund	Transcription factor AP-1;Transcription factor jun-D	73;100		0.119307	0.0412227	0.111876	-0.251083	-0.54596	-1.41088	0.244135	1.66515	0.898773	-0.0179637	-0.706506
Jun	Transcription factor AP-1	63		0.228286	-0.435537	0.389635	0.116735	-0.681366	-0.904144	-0.335235	1.90979	0.511997	0.163638	-0.357506
Nr3c1	Glucocorticoid receptor	275		0.243447	-0.572921	-0.0180493	-0.679884	-0.323821	0.263252	-0.230243	2.26625	-0.0211032	0.158435	-0.38402
Nr3c1	Glucocorticoid receptor	212		0.809807	-0.256548	-1.72454	0.10576	-0.190565	0.165958	-0.0175286	0.559972	0.788614	0.510497	-0.164833
Nr3c1	Glucocorticoid receptor	143		1	-0.144872	-0.506921	0.232258	0.0134122	-0.429207	-0.633508	0.788298	0.375719	0.347246	-0.021319
Abcb1b	Multidrug resistance protein 1B	659		0.763142	-0.591427	-0.697093	-0.855639	-0.614015	-0.0357137	-0.113106	0.487345	0.521257	1.10475	0.518363
Abcb1b;Abcb1a	Multidrug resistance protein 1B;Multidrug resistance protein 1A	589;586		1	0.00350575	-0.0997531	0.837051	-0.411206	0.611228	0.538811	-0.342175	-0.0517316	-0.427494	-0.406649
Ptprc	Receptor-type tyrosine-protein phosphatase C	981		1	-0.397358	-0.405991	0.159596	-0.117374	-0.0615012	-0.518013	0.0856422	0.838375	0.313872	0.0471884
Ptprc	Receptor-type tyrosine-protein phosphatase C	1227		1	0.543422	-0.635031	-0.422795	0.24287	-0.537198	0.436154	0.14859	0.240393	0.080456	-0.45847
Ptprc	Receptor-type tyrosine-protein phosphatase C	962		1	0.0185128	-0.210206	0.910488	-0.26378	0.594188	0.403745	0.412775	-0.242808	-0.315389	-0.880715
Pim1	Serine/threonine-protein kinase pim-1	32		0.90379	-0.434534	-0.412693	-0.719956	-0.691658	0.1144	-0.116122	-0.192835	1.02955	0.714131	0.406946
S100a4	Protein S100-A4	14		1	-0.0672714	-0.996393	0.526555	-0.153852	-0.501108	-0.00161836	0.689509	0.751698	-0.0153248	-0.302554
Anxa2	Annexin A2	12		0.519498	-0.665309	0.787753	-0.392388	-0.928316	0.637051	-0.334468	1.52099	-0.12426	0.347575	-0.210275
Hsp90aa1	Heat shock protein HSP 90-alpha	231		1	-0.360375	-0.133898	-1.12028	0.380978	0.700058	-0.125671	0.75015	0.122794	-0.0494607	-0.115288
Hsp90aa1	Heat shock protein HSP 90-alpha	252		0.836761	-0.739354	0.376867	-0.773943	0.262788	-0.377164	0.52665	-0.678658	0.567542	0.567414	-0.0953684
Hsp90aa1	Heat shock protein HSP 90-alpha	263		1	0.139167	0.746546	0.108817	-0.231968	-0.454531	-0.298569	0.0749129	0.199697	-0.309363	0.144227
Aprt	Adenine phosphoribosyltransferase	15		1	0.207392	-0.233132	0.634847	0.197204	-0.693833	-0.770678	0.472401	-0.366799	0.102389	0.49528
Hck	Tyrosine-protein kinase HCK	34		0.952482	-0.270249	-0.469292	-0.347355	0.154562	0.485689	-0.387987	-0.980919	0.369243	0.14258	0.975759
Hsp90b1	Endoplasmin	306		1	0.13403	-0.221573	0.716407	0.183665	0.137649	0.0135494	0.164085	-0.246524	-0.680629	-0.00151746
Apoe	Apolipoprotein E	139		0.995865	0.823881	-0.591139	0.816897	0.113604	-0.356783	-0.060969	-0.784782	-0.459345	-0.087649	0.357333
Sod1	Superoxide dismutase [Cu-Zn]	99		0.841465	-0.874617	0.287164	0.84089	0.33559	0.775414	0.543436	-0.370306	-0.360599	-0.320504	-0.473177
Sod1	Superoxide dismutase [Cu-Zn]	108		1	-0.00536187	0.200847	0.559632	-0.133887	0.346776	0.119567	0.564026	0.149799	-1.07014	-0.313442
Gnai2;Gnai3;Gnai1;Gnat2;Gnat1;Gnat3	Guanine nucleotide-binding protein G(i) subunit alpha-2;Guanine nucleotide-binding protein G(k) subunit alpha;Guanine nucleotide-binding protein G(i) subunit alpha-1;Guanine nucleotide-binding protein G(t) subunit alpha-2;Guanine nucleotide-binding protein G(t) subunit alpha-1;Guanine nucleotide-binding protein G(t) subunit alpha-3	207;206;206;206;202;206		1	-0.113407	-0.42468	0.125455	0.201509	0.456256	0.40634	-0.349711	0.539509	-0.117915	-0.771526
Polr2a	DNA-directed RNA polymerase II subunit RPB1	1836		1	-0.467121	-0.619999	-0.388568	-0.109632	-0.548219	0.360265	-0.208584	0.685087	0.635324	0.220103
Ncl	Nucleolin	616		0.857715	-0.0157041	0.244346	0.374053	-0.0238416	0.760464	0.827153	0.0870342	0.0301742	-1.39941	-0.517796
Ncl	Nucleolin	403		1	0.0570633	0.390706	-0.220136	0.110282	0.306422	0.223344	-0.12367	-0.0518181	-0.125779	-0.478084
Ncl	Nucleolin	303		1	-0.20607	-0.108037	0.570846	0.414682	-0.0544799	-0.137649	0.638638	0.081521	-0.689158	-0.248552
Pgk1	Phosphoglycerate kinase 1	203		1	-0.0311902	-0.178666	0.498995	0.215267	0.447549	-0.778067	0.0895322	-0.325005	0.398121	-0.122184
Junb	Transcription factor jun-B	23		1	-0.868344	0.105963	0.573163	-0.0442724	-0.212892	0.365245	0.109173	0.410657	0.0466923	-0.341533
Junb	Transcription factor jun-B	248		0.90994	0.18603	0.268915	-0.711844	-0.555531	0.111966	0.356098	-0.611007	0.616756	-0.645324	0.74845
Fth1	Ferritin heavy chain	5		0.879255	-0.21628	0.0199144	0.671375	0.68723	0.178255	0.703072	-0.594044	-0.830652	-0.0184502	-0.531545
Csf1r	Macrophage colony-stimulating factor 1 receptor	711		0.0790376	0.229382	0.247813	0.932917	0.341686	0.866211	1.11369	-0.981397	-0.960822	-1.14371	-0.379387
Csf1r	Macrophage colony-stimulating factor 1 receptor	731		0.219233	0.563968	0.111799	0.677721	0.154964	0.554433	1.2301	-0.744017	-0.674899	-1.00334	-0.720738
Csf1r	Macrophage colony-stimulating factor 1 receptor	732		1	0.222553	0.107259	0.385459	0.256686	-0.26525	0.137657	-0.528459	-0.463285	-0.000639036	0.0727716
Csf1r	Macrophage colony-stimulating factor 1 receptor	734		0.263448	0.956376	0.385484	1.13368	0.391678	0.509252	-0.195066	-0.854716	-0.741032	-0.285565	-1.00666
Surf1	Surfeit locus protein 1	227		1	-0.155005	-0.26781	0.797898	0.321281	-0.517773	-0.171712	0.560506	-0.256682	-0.280364	0.112867
Mamld1	Mastermind-like domain-containing protein 1	401		1	-1.05886	0.267994	0.819793	-0.322841	0.26526	-0.24585	0.777876	0.330638	-0.251768	-0.049515
Atxn1l	Ataxin-1-like	359		1	0.650825	-0.317455	0.791097	0.471893	0.0907447	-0.87149	-0.0846428	-0.311522	-0.096982	-0.202532
Atxn1l	Ataxin-1-like	282		1	-0.291653	-0.744253	0.379568	0.0349197	0.702001	-0.118811	0.673306	-0.0738173	-0.208116	-0.100489
Znf703	Zinc finger protein 703	257		0.664104	-1.36418	-0.864383	-0.0647999	0.526743	0.891373	0.0159901	0.0800266	0.294616	0.658669	-0.163499
Anxa1	Annexin A1	173		1	-0.22609	0.0830029	-0.38673	0.405694	0.00180336	-0.0394861	0.559864	-0.291729	-0.167446	0.125602
Fv4	Retrovirus-related Env polyprotein from Fv-4 locus;MLV-related proviral Env polyprotein;Surface protein;Transmembrane protein	677;639		1	-0.121372	0.127083	-0.208315	0.203876	-0.132845	0.241799	-0.234938	0.169533	0.119955	-0.277029
Alad	Delta-aminolevulinic acid dehydratase	215		1	0.100247	0.208958	-0.926516	0.134317	-0.0204627	0.103416	-0.349888	-0.399891	0.293719	0.584123
Tcea1	Transcription elongation factor A protein 1	135		1	-0.26456	-0.140643	-0.659772	-0.436435	0.356497	-0.0244757	0.537563	0.549186	0.367355	-0.261304
Tcea1	Transcription elongation factor A protein 1	100		1	-0.856595	0.185459	0.232851	0.105912	-0.530973	0.025277	0.695492	0.290774	0.299202	-0.301691
Hist1h2bf;Hist1h2bk;Hist1h2bb;Hist1h2bp;Hist3h2ba;Hist3h2bb;Hist1h2bc;Hist1h2bh;Hist1h2bm;Hist2h2bb;Hist2h2be	Histone H2B type 1-F/J/L;Histone H2B type 1-K;Histone H2B type 1-B;Histone H2B type 1-P;Histone H2B type 3-A;Histone H2B type 3-B;Histone H2B type 1-C/E/G;Histone H2B type 1-H;Histone H2B type 1-M;Histone H2B type 2-B;Histone H2B type 2-E	65;65;65;65;65;65;65;65;65;65;65		1	0.553964	0.0165691	0.514052	-0.582061	0.221693	0.365004	-0.892387	-0.0688131	0.432043	-0.595082
Hist1h2bf;Hist1h2bk;Hist1h2bb;Hist1h2bp;Hist1h2ba;Hist3h2ba;Hist3h2bb;Hist1h2bc;Hist1h2bh;Hist1h2bm;Hist2h2bb;Hist2h2be	Histone H2B type 1-F/J/L;Histone H2B type 1-K;Histone H2B type 1-B;Histone H2B type 1-P;Histone H2B type 1-A;Histone H2B type 3-A;Histone H2B type 3-B;Histone H2B type 1-C/E/G;Histone H2B type 1-H;Histone H2B type 1-M;Histone H2B type 2-B;Histone H2B type 2-E	56;56;56;56;57;56;56;56;56;56;56;56		0.981396	-0.72486	-0.698931	-0.520557	0.373786	0.0866439	0.712029	0.218674	-0.420926	0.277935	0.467663
Hist1h2bf;Hist1h2bk;Hist1h2bb;Hist1h2bp;Hist1h2ba;Hist3h2ba;Hist3h2bb;Hist1h2bc;Hist1h2bh;Hist1h2bm;Hist2h2bb;Hist2h2be	Histone H2B type 1-F/J/L;Histone H2B type 1-K;Histone H2B type 1-B;Histone H2B type 1-P;Histone H2B type 1-A;Histone H2B type 3-A;Histone H2B type 3-B;Histone H2B type 1-C/E/G;Histone H2B type 1-H;Histone H2B type 1-M;Histone H2B type 2-B;Histone H2B type 2-E	57;57;57;57;58;57;57;57;57;57;57;57		1	-0.505528	0.509497	0.0177089	-0.128058	0.140055	-0.288115	0.111301	0.723319	-0.697168	0.311628
Spp1	Osteopontin	250		1	-0.136336	0.2839	0.073045	-0.108156	0.282074	-0.0676814	-0.271327	-0.0537297	0.237425	-0.147291
Spp1	Osteopontin	290		0.227762	0.554498	-0.604657	1.62874	-0.724167	0.05534	-0.424634	-0.405251	0.655727	0.143919	-0.710975
Spp1	Osteopontin	231		1	0.0517319	-0.224471	-0.488077	-0.0298106	0.214717	0.36844	-0.519851	0.0204024	0.13491	0.217588
Spp1	Osteopontin	61		1	-0.20103	-0.0817469	0.163103	-0.0519382	-0.350381	0.697057	-0.275335	0.231639	-0.571034	0.303576
Spp1	Osteopontin	62		1	-0.912956	-0.0410834	-0.768947	-0.126072	0.333671	0.484835	0.0319374	0.479771	0.109921	0.297817
Sub1	Activated RNA polymerase II transcriptional coactivator p15	118		1	0.488437	0.150488	-0.282259	0.19432	0.864517	0.504757	-0.456604	-0.567562	-0.528595	-0.298463
Rrm2	Ribonucleoside-diphosphate reductase subunit M2	20		1	0.261424	0.312391	0.0760287	0.106549	0.155338	0.141947	-0.281976	0.00641202	-0.240526	-0.472142
Hsp90ab1	Heat shock protein HSP 90-beta	255		1	0.00748183	0.0678108	0.622969	0.0378085	-0.160392	0.324284	0.291905	-0.316548	-0.28405	-0.385697
Hsp90ab1	Heat shock protein HSP 90-beta	226		1	-1.34821	0.116177	0.220996	0.185981	0.211168	0.190895	0.398834	0.183871	0.19575	-0.118666
Hsp90ab1	Heat shock protein HSP 90-beta	445		1	0.614459	0.288612	0.650025	-0.167168	0.718067	-0.327854	-0.261581	0.0656403	-0.515697	-0.715722
Itga5	Integrin alpha-5;Integrin alpha-5 heavy chain;Integrin alpha-5 light chain	1051		1	-0.199151	-0.0798468	0.0278176	0.646523	0.101212	-1.08634	0.0812901	0.137296	0.276513	0.127309
Itpr1	Inositol 1,4,5-trisphosphate receptor type 1	1588		1	-0.334107	0.0141364	-0.843428	0.0605776	0.774903	-0.0353153	-0.168326	0.0669941	0.0886966	0.320189
Itpr1	Inositol 1,4,5-trisphosphate receptor type 1	1755		1	0.106994	-0.0360911	0.280059	-0.145212	0.783611	-0.359179	0.546267	-0.214297	0.161548	-0.730239
Tcp1	T-complex protein 1 subunit alpha	544		1	-0.363179	-0.783435	0.665334	0.361727	0.657083	0.490331	0.0422969	-0.0777105	0.04997	-0.897098
Tcp1	T-complex protein 1 subunit alpha	551		1	-0.247967	-0.195605	0.608169	0.176189	0.128683	0.259629	0.558624	-0.793042	0.0692327	-0.288944
Pfkl	6-phosphofructokinase, liver type	775		1	0.45036	-0.237655	-0.275195	-0.470698	-0.235079	0.0387693	0.117975	0.73155	0.219497	-0.497014
Gsn	Gelsolin	560		0.84728	-0.740467	-0.625538	0.746911	0.715239	-0.174054	-0.906014	0.652116	0.357598	0.125714	-0.00164616
Rb1	Retinoblastoma-associated protein	31		1	0.226632	-0.140362	-0.791183	-0.0654852	0.538174	-0.511458	0.499311	0.102643	-0.298441	0.466655
Rb1	Retinoblastoma-associated protein	243		1	-0.139248	-0.307586	0.10263	0.21624	0.713698	0.599501	-0.0809698	0.0800305	-0.313896	-0.763457
Slc4a2	Anion exchange protein 2	144		0.998571	-0.280539	0.217887	0.248195	-0.235028	0.307131	0.300555	1.04995	-0.683303	0.085476	-0.554531
Slc4a2	Anion exchange protein 2	239		0.628961	-0.826806	-0.789661	-0.294698	-0.221241	0.606774	0.625341	0.623055	0.00645483	-0.71407	1.02122
Slc4a2	Anion exchange protein 2	439		1	-0.604328	-0.480117	0.367799	-0.515801	-0.168402	0.603927	0.362425	0.251895	-0.0468351	0.249863
Slc4a2	Anion exchange protein 2	24		0.0703471	0.127256	-0.33866	-0.0469362	-0.944949	-0.739591	-0.346062	1.63789	-0.728375	0.768077	0.739526
Slc4a2	Anion exchange protein 2	131		0.864469	-0.186471	0.0706695	1.1035	0.315853	1.05012	-0.312963	-0.404334	-0.16881	-0.368583	-0.643999
Slc4a2	Anion exchange protein 2	271		0.957361	-0.679439	-0.0705002	-0.110331	-0.180522	0.205547	-0.346592	0.0189094	1.228	0.402288	-0.456458
Slc4a2	Anion exchange protein 2	228		0.243286	-1.07161	-0.949716	-0.604995	-0.669472	0.263248	0.207051	0.120457	0.83013	0.808853	0.7733
Dnmt1	DNA (cytosine-5)-methyltransferase 1	125		1	-0.343722	0.478576	-0.198902	0.314797	0.452812	0.253945	-0.868636	0.4031	-0.406934	-0.119073
Dnmt1	DNA (cytosine-5)-methyltransferase 1	187		1	0.165229	0.322353	-0.287198	-0.603266	-0.176338	0.292572	-0.0259605	0.218927	-0.184647	0.236542
Dnmt1	DNA (cytosine-5)-methyltransferase 1	190		1	-0.0151374	0.843979	0.262997	-0.317338	0.328358	0.222023	-0.683069	-0.0152899	-0.362056	-0.076401
Dnmt1	DNA (cytosine-5)-methyltransferase 1	140		0.85999	-0.488443	-0.515951	-0.500128	-0.117588	-0.620084	-0.267346	0.329409	1.21067	0.497687	0.145082
Dnmt1	DNA (cytosine-5)-methyltransferase 1	142		0.485548	-0.74724	-0.626276	-0.218537	-0.728131	0.042827	0.416446	1.45106	0.714883	0.0947075	-0.237468
Dnmt1	DNA (cytosine-5)-methyltransferase 1	152		0.842415	-0.936685	0.476631	0.806223	-0.566489	0.290706	-0.386257	0.546157	0.639804	-0.0329058	-0.307255
Dnmt1	DNA (cytosine-5)-methyltransferase 1	15		1	0.266201	0.12115	-0.117616	-0.820023	-0.0324991	0.234536	0.439485	-0.224133	0.36099	-0.125461
Mdh1	Malate dehydrogenase, cytoplasmic	241		1	-0.573125	-0.357367	0.601607	0.653181	0.705508	-0.0494784	-0.175055	-0.340289	-0.323562	0.0522545
Psmd3	26S proteasome non-ATPase regulatory subunit 3	45		0.887876	-0.86643	-0.0740387	0.156069	-1.10172	0.0281264	0.331378	0.572975	0.35771	0.463353	0.303364
Lmnb1	Lamin-B1	17		0.863537	-0.433979	-0.419547	-0.602754	-0.144939	0.220196	0.548508	0.811532	0.739535	0.230351	-0.946545
Lmnb1	Lamin-B1	24		1	-0.101705	0.740273	0.0158251	0.157956	-0.846121	-0.0916616	-0.406723	0.593729	0.0216242	-0.207383
Lmnb1	Lamin-B1	280		0.923955	-1.27532	-0.231542	0.29745	0.112663	0.661898	0.166297	0.664815	-0.0365794	0.326722	-0.338245
Lmnb1;Lmnb2	Lamin-B1;Lamin-B2	392;383		0.981074	-0.73225	0.419136	0.0982983	0.485102	-0.386196	0.491767	-0.312075	-0.14886	0.647557	-0.607688
Lmnb1	Lamin-B1	159		1	-0.528687	0.444861	0.927468	-0.196028	-0.314779	-0.0238708	0.658696	-0.0997005	-0.0631033	-0.375795
Hmox1	Heme oxygenase 1	174		1	0.337404	0.0743268	0.776068	-0.510869	0.445751	0.389036	0.156712	-0.150148	-0.925101	-0.229966
Hmox1	Heme oxygenase 1	229		1	0.281275	0.446533	0.0176082	0.234844	-0.238156	-0.156787	0.637185	-0.846521	0.262407	-0.422597
Insr	Insulin receptor;Insulin receptor subunit alpha;Insulin receptor subunit beta	1340		1	-0.899709	-0.287209	-0.0992524	-0.130575	0.586967	0.338643	0.412134	-0.0234149	9.59635e-06	0.255567
Ifngr1	Interferon gamma receptor 1	370		0.977884	0.793865	-0.000548055	0.801548	-0.314319	0.033307	0.371818	0.200147	-0.191362	-0.568182	-0.86766
Ifngr1	Interferon gamma receptor 1	300		0.889997	0.319803	0.0393	0.673073	0.441477	0.514932	0.24246	-0.330716	0.178425	-1.00525	-0.849357
Cd44	CD44 antigen	742		1	0.0311406	-0.0425211	-0.54228	-0.19806	-0.00988998	-0.535815	-0.238752	0.45035	0.503751	0.373716
Cd44	CD44 antigen	771		1	0.374965	-0.221309	0.324828	0.175938	0.404761	-0.412846	0.0100572	-0.0727895	0.265051	-0.719072
Nme1	Nucleoside diphosphate kinase A	120		1	0.0584879	0.271367	0.398598	-0.204496	0.725942	-0.0010065	-0.214364	0.109061	-0.168178	-0.680025
Trim30a	Tripartite motif-containing protein 30A	260		1	-0.360925	-0.0767706	0.489667	-0.0784499	-0.195552	-0.358515	0.605726	0.441105	0.165325	-0.425843
Spn	Leukosialin	371		1	0.0224136	0.456599	0.068629	0.379272	-0.298805	0.636027	-0.245659	0.0416956	-0.168051	-0.89693
Spn	Leukosialin	381		0.655541	-0.991532	-0.562872	-0.346865	0.283248	0.423845	-0.687285	0.239964	-0.0484502	1.05194	0.576528
Spn	Leukosialin	328		1	0.448937	0.534436	-0.0996199	-0.469961	0.722482	0.0245498	-0.116553	-0.409793	-0.0397394	-0.334552
Spn	Leukosialin	347		0.981755	-0.209375	-0.0222518	-1.45595	-0.100486	0.061632	0.324358	0.387252	-0.257621	0.489273	0.525841
Spn	Leukosialin	343		1	0.257244	0.627746	0.265117	0.0291898	-0.212386	0.304036	-0.407136	-0.0864686	-0.0951667	-0.613839
Spn	Leukosialin	312		1	0.248612	0.507161	-0.607005	-0.0171373	0.339259	-0.127503	0.616008	-0.196984	0.239671	-0.788225
Tcf3	Transcription factor E2-alpha	140		1	-0.24547	-0.447374	1.04475	-0.522052	0.432343	0.497834	-0.441451	-0.193452	0.126574	-0.104633
Hist1h1c;Hist1h1d	Histone H1.2;Histone H1.3	36;37		0.743421	-0.649775	-0.613123	0.133691	-0.772492	-0.668656	-0.306145	0.598198	0.916375	0.983561	0.240893
Hist1h1c;Hist1h1t;Hist1h1e;Hist1h1b;Hist1h1d	Histone H1.2;Histone H1t;Histone H1.4;Histone H1.5;Histone H1.3	102;104;102;102;103		1	0.0963114	-0.823898	0.33088	0.312734	0.485887	0.196451	-0.186282	-0.0715927	0.0676646	-0.456508
Hist1h1c;Hist1h1t;Hist1h1e;Hist1h1b;Hist1h1d	Histone H1.2;Histone H1t;Histone H1.4;Histone H1.5;Histone H1.3	104;106;104;104;105		1	0.167029	-0.0262191	0.543799	0.213686	0.302536	0.379269	0.443391	-0.166335	-0.496823	-1.04446
Hist1h1c	Histone H1.2	2		0.889295	-0.338625	-0.0684485	-0.565026	0.285197	0.515826	0.508637	-0.276036	0.275126	0.622615	-1.05769
Atp6v0a2	V-type proton ATPase 116 kDa subunit a isoform 2	695		1	-0.118785	0.271253	0.391632	-0.570389	0.19004	0.483364	0.327954	-0.0312814	-0.559736	-0.0888328
Lgals1	Galectin-1	30		1	-0.336645	-0.616619	0.365791	-0.615933	0.723114	0.350759	0.641352	0.1785	-0.184233	-0.227677
Lgals3	Galectin-3	202		1	-0.323201	-0.125213	0.451243	-0.331263	0.573647	0.285073	0.564706	0.0894689	-0.008632	-0.809733
Lgals3	Galectin-3	208		0.9278	-0.215029	-0.29323	0.408394	-0.141439	-0.916629	-0.667872	0.461881	-0.17272	0.790653	0.661096
Srp14	Signal recognition particle 14 kDa protein;Signal recognition particle 14 kDa protein, N-terminally processed	45		0.9323	-0.0943043	-0.0290013	1.14715	0.157918	-0.199406	0.302516	0.607509	0.0927825	-0.615339	-0.98826
Sptan1	Spectrin alpha chain, non-erythrocytic 1	1029		1	-0.181425	0.279208	-0.200789	0.246641	-0.0326572	0.0575588	0.869069	0.373851	-0.622365	-0.560384
Sptan1	Spectrin alpha chain, non-erythrocytic 1	1031		1	-1.02189	-0.426707	0.346245	-0.0535676	0.462824	0.330627	-0.28725	0.461589	0.0901647	0.121738
Sptan1	Spectrin alpha chain, non-erythrocytic 1	1217		1	0.205261	0.846057	-0.669322	-0.0257537	0.120008	0.0909232	-0.254711	0.365547	0.132932	-0.800433
Il7r	Interleukin-7 receptor subunit alpha	350		1	-0.623156	-0.127721	-0.245468	-0.0654327	0.244061	0.523494	0.254003	0.214396	0.169837	-0.312795
Fes	Tyrosine-protein kinase Fes/Fps	411		1	-0.0375104	0.437257	0.73804	-0.205383	0.0277769	0.0155616	0.207507	-0.267599	0.582899	-1.1459
Atf2	Cyclic AMP-dependent transcription factor ATF-2	94		0.810822	-0.593177	0.0620159	0.654254	0.075572	0.103506	-0.0336218	1.63225	-0.701046	-0.35935	-0.227399
Atf2	Cyclic AMP-dependent transcription factor ATF-2	310		0.906972	-0.0933929	0.472825	-0.861153	0.0569846	-0.031194	-0.0803858	0.265939	0.704667	0.521658	-0.994344
Zfx	Zinc finger X-chromosomal protein	269		1	-0.0325803	0.196643	0.354478	-0.0534734	0.461686	0.344351	0.440987	-1.29085	0.0918173	-0.14961
Hmga1	High mobility group protein HMG-I/HMG-Y	36		0.944334	-0.139836	-0.729248	0.343404	0.0769256	0.19617	0.237185	1.26955	-0.449701	0.319068	-0.853547
Hmga1	High mobility group protein HMG-I/HMG-Y	44		0.644936	0.399624	0.734433	0.433249	-0.292224	1.11138	0.0968318	-0.288072	-0.278837	-1.2641	-0.154539
Hmga1	High mobility group protein HMG-I/HMG-Y	9		1	-0.202059	0.0421276	-0.147929	-0.552232	0.146511	0.306547	0.394595	-0.179534	0.404092	-0.103294
Eno1	Alpha-enolase	419		1	-0.369422	-0.0259797	0.146455	0.176929	-0.607643	-0.402634	0.110772	1.04601	0.0333376	-0.201924
Eno1	Alpha-enolase	79		1	-0.713865	-0.268829	0.92135	-0.177252	0.013009	-0.259839	0.485363	0.205059	0.0263774	0.0563497
Eno1	Alpha-enolase	263		1	-0.7077	-0.120776	0.276457	-0.374056	0.728394	-0.534229	0.180804	0.542034	0.284751	-0.00945912
Spi1	Transcription factor PU.1	148		0.750379	0.180909	0.656556	-0.563823	0.0516249	-0.399445	-0.637581	0.803592	-0.473966	-0.461711	0.968065
Tpi1	Triosephosphate isomerase	273		1	-0.110793	0.0198593	-0.121302	-0.597754	0.936822	-0.428705	0.473074	-0.409332	0.232634	0.332611
Ptpra	Receptor-type tyrosine-protein phosphatase alpha	180		0.801236	0.242675	-1.59948	0.220054	0.328126	0.405812	0.251786	0.352802	-0.424085	-0.328788	0.395898
Slc7a2	Low affinity cationic amino acid transporter 2	645		0.0505574	-1.00065	-0.670793	-0.210527	-0.0271302	1.15589	-0.441623	-0.45244	-0.614681	0.856684	1.3608
Hmgn1	Non-histone chromosomal protein HMG-14	7		0.290028	0.0424862	-0.8316	0.024485	-0.353489	-0.0288859	-1.32743	1.13776	0.30927	0.690616	0.412225
Hmgn1	Non-histone chromosomal protein HMG-14	84		1	-0.0550751	0.0758339	-0.0759799	0.236852	0.0817688	0.520747	0.571929	-0.831372	-0.776386	0.41507
Hmgn1	Non-histone chromosomal protein HMG-14	87		1	-0.204702	0.357119	0.331866	-0.127066	-0.364777	-0.551609	0.522459	0.436346	0.342821	-0.530793
Rps6ka1	Ribosomal protein S6 kinase alpha-1	352		1	-0.208272	-0.154349	-0.687248	-0.00104768	0.423984	0.197486	0.673587	-0.487859	0.587521	-0.279809
Rps6ka1	Ribosomal protein S6 kinase alpha-1	369		1	0.0966076	-0.141695	0.184554	-0.0871631	0.182272	0.571974	-0.522774	0.0849749	0.338908	-0.782069
Rps6ka3	Ribosomal protein S6 kinase alpha-3	369		1	-0.381546	-0.713621	0.374139	-0.747748	-0.0333382	-0.298651	0.747432	0.474891	0.449697	0.222399
Rps6ka3	Ribosomal protein S6 kinase alpha-3	386		1	0.0941645	0.17957	0.747021	-0.194958	-0.430478	-0.127247	-0.423215	-0.0999598	0.315917	-0.0425898
Rps6ka3	Ribosomal protein S6 kinase alpha-3	715		1	0.0947286	-0.0873525	0.0919192	0.0740856	0.482818	0.290979	0.396409	-0.750941	-0.0260161	-0.345682
Cfl1	Cofilin-1	3		1	0.0926647	-0.535189	1.02467	-0.0996744	0.640407	0.122206	0.0378932	-0.511363	0.227173	-0.706845
Cfl1	Cofilin-1	24		0.728031	-1.2852	-0.15154	0.607287	-0.0831151	-0.0751018	-0.039542	1.04215	0.579679	0.15385	-0.392769
Cfl1	Cofilin-1	156		1	-0.902963	-0.466052	0.449134	-0.406961	0.523949	-0.144499	0.539577	0.597933	0.203039	-0.131506
Rarg	Retinoic acid receptor gamma	451		0.86549	-0.0616307	0.149165	0.400693	-1.29492	-0.549556	0.1361	0.449787	-0.112003	0.0581025	0.936787
Nelfe	Negative elongation factor E	49		0.564633	-0.713701	0.458436	-0.613422	0.0966472	-1.57476	0.707582	0.369625	0.24048	0.390861	0.298222
Nelfe	Negative elongation factor E	51		1	-0.252	-0.0590191	0.679102	-0.277112	0.223361	0.346549	0.815647	0.00737442	0.0335321	-1.10266
Nelfe	Negative elongation factor E	115		1	0.135876	-0.568927	0.903813	-0.250931	0.0157289	-0.060012	0.202825	-0.073098	0.108927	-0.275843
Nelfe	Negative elongation factor E	181		1	-0.0820081	0.117583	0.17841	0.373221	0.326172	-0.446272	-0.628187	0.525237	-0.439778	0.0741156
Lsp1	Lymphocyte-specific protein 1	74		0.662213	-0.607892	-0.670894	0.0112961	-0.559138	0.490333	-0.735225	1.21234	0.20277	0.0725254	0.844651
Lsp1	Lymphocyte-specific protein 1	152		0.567722	-0.635598	-0.0596778	-1.53885	-0.0674425	-0.430811	0.295354	0.63826	0.741865	0.590661	0.118471
Lsp1	Lymphocyte-specific protein 1	168		0.562514	0.838059	-0.840939	0.895808	0.353293	0.0998825	0.482445	-0.905779	-0.418795	-0.060879	-0.630853
Lsp1	Lymphocyte-specific protein 1	179		0.869128	-0.629488	-0.643394	-0.462385	0.287442	0.359241	1.06455	-0.134153	-0.0227543	0.446873	-0.486102
Lsp1	Lymphocyte-specific protein 1	180		1	-0.0535346	0.730041	0.815202	-0.295592	-0.0323994	-0.68998	0.0146653	0.285845	-0.203955	-0.188416
Lsp1	Lymphocyte-specific protein 1	195		0.655327	0.16326	0.30172	0.314719	-0.507366	0.49622	0.236688	0.476236	0.226837	0.234954	-1.54604
Lsp1	Lymphocyte-specific protein 1	243		1	-0.495105	0.248759	-0.140558	-0.472856	-0.483943	0.133948	0.70043	0.152627	0.0971845	0.340687
Lsp1	Lymphocyte-specific protein 1	209		1	-0.305329	-0.884684	0.276065	-0.238706	0.494372	-0.170622	1.25061	0.0320803	0.133298	-0.30299
Lsp1	Lymphocyte-specific protein 1	136		0.170025	-0.817443	0.157952	0.00519945	-0.627472	1.36245	-0.725536	0.247952	0.0029252	1.21624	-0.378879
Hspa5	78 kDa glucose-regulated protein	650		0.84054	-1.25527	-0.343699	0.517828	0.073472	-0.506763	-0.192981	0.496965	0.233708	0.820273	0.197551
Tmsb4x	Thymosin beta-4;Hematopoietic system regulatory peptide	37		0.674395	-1.04865	-0.24918	0.223684	-0.541003	-0.388022	0.272187	0.423968	0.569636	1.08825	-0.348258
Vim	Vimentin	459		1	0.236602	0.294617	-0.491885	0.437915	0.434403	0.179302	-0.165655	-0.290373	-0.0952682	-0.521788
Vim	Vimentin	201		0.734456	0.171551	-1.99481	0.370147	0.307781	0.379055	0.254136	0.287689	0.347758	0.0620846	-0.42487
Vim	Vimentin	205		0.53271	-0.162512	-1.85855	-0.0624206	-0.130362	0.660536	0.0869615	0.496657	0.15678	0.561038	0.0609296
Vim	Vimentin	214		1	0.196234	0.331627	0.235777	-0.569576	0.214917	-0.878534	0.0411761	0.293861	0.276718	0.0636748
Vim	Vimentin	430		0.760146	-0.588306	-0.424405	-0.210039	-0.655581	-0.294601	-0.0660059	1.1502	-0.155927	0.984567	0.315389
Vim	Vimentin	438		1	-0.452056	-0.591411	0.783956	0.552582	0.0353914	-0.218938	-0.434506	-0.0677978	0.0853409	0.255796
Vim	Vimentin	299		1	-0.576706	-0.402236	0.536895	-0.382139	0.646213	0.0660526	0.563462	0.0581303	0.630062	-0.803649
Vim;Gfap	Vimentin;Glial fibrillary acidic protein	339;302		1	0.391923	0.259561	-0.627518	-0.260788	0.59182	-0.284061	-0.540035	-0.279598	0.470634	0.199019
Vim	Vimentin	412		0.294729	0.371628	0.293563	0.24525	0.161947	0.230516	0.39605	-2.26795	0.247565	0.0118218	-0.0650451
Vim	Vimentin	419		0.824748	0.589357	0.098937	0.166624	0.241677	0.752934	0.441349	-0.286045	-0.0551326	-1.05432	-0.712266
Vim	Vimentin	420		0.853809	0.378152	-1.34487	0.45665	-0.266055	-0.390128	0.322971	0.259835	0.676938	-0.217731	-0.130393
Vim	Vimentin	409		1	-0.256228	-0.10072	0.210397	0.352397	0.657818	0.0241914	-0.717018	-0.0085047	-0.561634	0.411921
Vim	Vimentin	83		0.847259	-0.442033	-0.553001	-0.41158	-0.887265	-0.248083	-0.190865	0.659991	0.742432	1.11064	0.0815999
Vim	Vimentin	87		0.906738	-0.228332	-0.664198	-1.01201	-0.361601	0.138665	0.141337	1.23076	0.253579	0.536663	-0.111557
Vim	Vimentin	72		0.598728	0.175982	-1.15609	0.13432	-0.231711	0.249824	-0.459846	1.06538	-0.0739419	1.01244	-0.642997
Vim	Vimentin	73		1	-0.737163	0.336927	0.697753	0.377097	0.320949	0.12916	-0.574923	0.169139	-0.417506	-0.106257
Vim	Vimentin	56		1	0.109737	0.139198	0.184088	-0.104471	-0.379413	0.493544	0.0266381	0.314355	0.260957	-1.05201
Vim	Vimentin	144		1	-0.489494	0.606344	0.333288	-0.329576	0.66791	-0.358777	0.811508	-0.158449	-0.295494	-0.182497
Vim	Vimentin	39		1	0.143372	-0.23532	-0.594522	-0.543507	0.330261	0.189374	0.0701945	0.276503	0.315261	-0.0589632
Fcer1g	High affinity immunoglobulin epsilon receptor subunit gamma	72		1	-0.811529	-0.520397	-0.0250006	0.0422508	0.123707	0.00358217	0.635759	0.587159	0.541342	-0.523357
Evi2a	Protein EVI2A	203		1	0.259844	-0.126716	0.82801	0.0188277	0.872283	-0.577251	0.172833	0.0845065	-0.700909	-0.394826
Tpm3	Tropomyosin alpha-3 chain	284		0.289686	-1.03352	-0.443964	0.0157825	-0.399861	-0.502631	-0.161337	1.65716	-0.243027	0.828904	0.464084
Abcb4	Multidrug resistance protein 3	22		1	-0.26617	-0.104285	0.435512	-0.665005	0.0579772	-0.430736	0.215425	1.0696	0.212058	-0.373216
Lmnb2	Lamin-B2	401		1	0.139256	0.28979	-0.618835	-0.107483	-0.74927	0.320896	0.656699	0.222655	-0.130087	-0.129025
Lmnb2	Lamin-B2	427		1	-0.0401288	0.237117	-0.581666	0.244254	-0.0767542	0.142594	-0.598133	0.181229	0.327869	-0.0912409
Tgm2	Protein-glutamine gamma-glutamyltransferase 2	449		1	-0.55336	-0.13798	0.237397	-0.389248	0.577777	-0.0546001	0.519437	0.198236	-0.421048	0.322546
Emb	Embigin	312		1	-0.573211	-0.193052	0.336771	0.114525	0.453235	0.156854	0.485995	-0.330249	-0.179797	-0.000335202
Myd88	Myeloid differentiation primary response protein MyD88	12		1	-0.498207	0.492495	0.272657	-0.254436	0.328121	-0.529989	0.0579279	0.281569	0.263996	-0.126333
Cbl	E3 ubiquitin-protein ligase CBL	617		0.715789	-0.957411	-0.410566	1.40102	-0.436471	-0.338488	0.34447	0.2068	0.0544699	-0.14288	0.493745
Cbl	E3 ubiquitin-protein ligase CBL	692		1	-0.0215683	-0.833672	0.788431	-0.296694	0.902443	-0.173228	0.174445	-0.203076	0.214224	-0.293393
Cbl	E3 ubiquitin-protein ligase CBL	722		1	-0.367035	-0.302804	0.00450291	0.152786	-0.296435	0.304526	-0.165247	0.0375594	0.61295	-0.170799
Eif3a	Eukaryotic translation initiation factor 3 subunit A	978		1	0.117094	-0.365704	-0.4952	-0.0418448	0.818112	0.973985	-0.250891	0.253501	-0.485189	-0.597284
Cbx3	Chromobox protein homolog 3	95		1	-0.188114	0.380644	0.407318	0.201307	-0.277732	0.444195	0.072276	-1.04237	-0.106179	0.254284
Mov10	Putative helicase MOV-10	970		1	-0.101109	-0.124893	-0.438217	0.388426	0.0193363	0.094437	-0.233994	0.152126	0.124067	-0.0746224
Prkch	Protein kinase C eta type	675		1	-0.0785111	-0.363758	0.565195	-0.0432688	0.565084	0.352984	-0.0906087	-0.121098	0.575767	-1.19281
Prkch	Protein kinase C eta type	637		0.799073	-1.15048	-0.0339831	0.100018	-1.05921	-0.0334082	0.546904	0.499649	0.529701	0.421312	0.312567
Ggta1	N-acetyllactosaminide alpha-1,3-galactosyltransferase	20		1	-0.344452	-0.0202625	0.178416	0.216477	0.589919	0.031868	0.318646	0.420115	-0.469169	-0.654878
Pnp	Purine nucleoside phosphorylase	289		1	0.362204	0.266777	0.607054	-1.01108	0.362882	-0.0671295	0.463001	-0.553088	0.170446	-0.176142
Mdm2	E3 ubiquitin-protein ligase Mdm2	161		0.755228	-0.364703	-0.453168	-0.696419	-0.255836	0.116104	0.533879	1.64404	0.0185402	-0.184695	-0.205103
Zfp36l2;Zfp36l1	Zinc finger protein 36, C3H1 type-like 2;Zinc finger protein 36, C3H1 type-like 1	480;334		1	0.225665	-0.127947	0.478553	0.208647	-0.374993	-0.523547	0.0580698	-0.278465	0.135064	0.207374
Zfp36l2	Zinc finger protein 36, C3H1 type-like 2	127		0.951872	1.15198	-0.42866	0.630545	-0.599105	-0.368967	0.0409528	-0.12564	-0.142379	-0.336042	0.104134
Zfp36l1	Zinc finger protein 36, C3H1 type-like 1	92		0.429705	-0.824402	-0.908217	-0.116944	-0.0466598	0.297621	-0.756627	-0.0981117	0.156727	0.920225	1.16998
Zfp36l1	Zinc finger protein 36, C3H1 type-like 1	54		0.760571	-0.600394	-1.21365	-0.118668	0.134721	0.16572	-0.571346	0.131656	0.303859	0.772258	0.737108
Cat	Catalase	21		0.944548	-0.446487	-0.0448495	-0.620323	-0.176884	1.38637	-0.212736	0.511531	-0.303924	0.372211	-0.156729
Cat	Catalase	2		1	-0.020278	-0.676366	0.274052	-0.0104175	0.313393	0.442718	0.08376	-0.0519954	-0.437015	0.0808581
Capg	Macrophage-capping protein	327		1	0.226071	-0.0800669	-0.172124	0.201028	0.0965953	-0.00626604	0.287074	-0.0304824	-0.509895	0.0209346
Capg	Macrophage-capping protein	341		1	-0.482413	-0.553888	0.480583	-0.160276	0.52659	0.509363	0.223288	0.103551	-0.038285	-0.439369
Impdh2	Inosine-5'-monophosphate dehydrogenase 2	416		0.971779	0.566535	-0.652929	0.572882	0.780693	-0.0876467	-0.140967	-0.213372	-0.401302	0.248783	-0.767942
M6pr	Cation-dependent mannose-6-phosphate receptor	268		1	-0.110284	0.0851436	0.515141	-0.0296001	-0.0653148	-0.0773602	0.539919	0.508185	-0.379622	-0.717485
Cdk11b	Cyclin-dependent kinase 11B	270		1	-0.660404	-0.41721	-0.415178	-0.615245	0.591698	0.378234	0.201043	0.470685	0.336321	0.120144
Cdk11b	Cyclin-dependent kinase 11B	741		0.818921	-0.637769	0.33184	0.00306727	-0.429965	-0.685764	0.680047	0.525129	0.757389	0.175575	-0.675981
Cdk11b	Cyclin-dependent kinase 11B	65		1	0.234692	-0.198153	0.291165	-0.664758	0.775412	0.00383766	-0.0148267	0.374215	0.0564969	-0.644682
Cdk11b	Cyclin-dependent kinase 11B	47		1	-1.02826	0.589842	-0.158485	0.155233	-0.0216087	-0.0663614	0.414295	0.514959	0.09069	-0.284298
Cdk11b	Cyclin-dependent kinase 11B	234		1	0.143217	-0.293608	0.650788	0.361487	0.873665	-0.29836	-0.461576	0.136186	-0.023797	-0.895685
Mcm3	DNA replication licensing factor MCM3	672		0.974913	0.287851	0.232901	-1.44889	-0.221635	-0.503718	0.385256	0.144397	0.240208	0.315041	0.17476
Mcm3	DNA replication licensing factor MCM3	738		1	0.161773	0.385921	-0.499369	0.34456	0.0216934	-0.196257	0.0466558	-0.196069	0.528679	-0.608862
Pou2f1;Pou2f3	POU domain, class 2, transcription factor 1;POU domain, class 2, transcription factor 3	388;280		0.559224	0.338837	0.0322184	0.823063	0.15217	-0.0291906	-0.565235	1.5426	-0.283113	-0.357398	-1.06178
Fas	Tumor necrosis factor receptor superfamily member 6	220		1	-0.637723	0.116783	0.22862	-0.262745	-0.539108	-0.276349	0.735981	0.64446	-0.0725662	0.198217
Nfkb1	Nuclear factor NF-kappa-B p105 subunit;Nuclear factor NF-kappa-B p50 subunit	940		0.981041	-0.169694	-0.342742	0.370315	-0.0730859	0.489379	0.57125	-1.54846	0.0500747	0.136477	0.258608
Nfkb1	Nuclear factor NF-kappa-B p105 subunit;Nuclear factor NF-kappa-B p50 subunit	447		1	-0.42239	-0.679709	0.219137	-0.351784	1.08402	0.197076	0.283029	0.019093	-0.113155	-0.00869847
Lyn	Tyrosine-protein kinase Lyn	19		1	-0.0447807	-0.348871	-0.194219	-0.0840905	-0.348071	0.559591	0.691763	0.0228161	-0.0682052	-0.235782
Lyn;Blk	Tyrosine-protein kinase Lyn;Tyrosine-protein kinase Blk	187;175		0.878804	0.0709871	-0.518912	1.2058	0.363911	0.337914	0.592714	-0.00863513	-0.621038	-0.458955	-0.709743
Ubtf	Nucleolar transcription factor 1	638		1	-0.409839	0.419267	0.647841	0.0971224	-0.269042	-0.0373882	-0.46448	0.65007	-0.0228459	-0.527309
Tln1	Talin-1	425		1	-0.15309	0.0719689	-0.0987376	-0.235648	-0.406317	-0.0736197	0.0427588	0.34427	0.304496	0.106337
Tln1	Talin-1	2338		0.433273	-0.62013	-0.478033	0.0781837	-0.537478	-0.665167	-0.331934	0.347359	1.42195	0.880758	-0.274924
Tln1	Talin-1	1225		0.405701	-0.142595	-1.16064	-0.200021	-1.02538	0.341216	-0.540378	0.873715	0.530185	0.689298	0.598162
Tln1	Talin-1	2040		1	-0.0406932	-0.581109	0.0598246	0.113454	-0.00463131	-0.00408956	-0.246236	0.162338	0.143865	0.204239
Ezr;Msn;Rdx	Ezrin;Moesin;Radixin	249;249;249		1	-0.41051	-0.37906	0.395224	-0.0941549	-0.315808	-0.17226	0.77988	-0.28316	0.319984	0.279924
Msn	Moesin	527		0.841121	-0.423754	0.237671	-0.434974	-0.788154	0.722516	0.379187	0.824127	-0.0769899	0.724603	-0.826898
Msn	Moesin	407		0.773412	0.394305	-0.0526057	0.288181	0.259176	1.56985	-0.462328	-1.23227	-0.227818	-0.190386	-0.202819
Msn	Moesin	74		1	-0.244634	-0.00864738	0.0343359	-0.0304043	0.402311	-0.394915	0.37045	0.322401	0.413997	-0.665282
Msn	Moesin	576		1	-0.264245	-0.59501	-0.429773	-0.376343	-0.0489653	-0.502672	0.7771	0.0514685	0.411787	0.902491
Msn	Moesin	491		1	0.160279	-0.411852	0.106729	0.0965217	-0.449447	-0.583373	0.342012	0.44558	0.292897	-0.102486
Fcgr1	High affinity immunoglobulin gamma Fc receptor I	347		1	-0.381942	-0.23127	0.417312	0.168846	0.174822	0.0307887	0.191149	-0.0359484	-0.00737612	-0.188378
Fcgr1	High affinity immunoglobulin gamma Fc receptor I	365		0.94861	-0.439537	-0.7727	-0.288494	-0.403375	0.020763	-0.0789577	0.0312382	0.879945	0.00936975	0.789449
Ctnna1;Ctnna2	Catenin alpha-1;Catenin alpha-2	655;654		1	-0.276806	-0.386864	0.452723	0.592531	-0.221067	0.151459	0.583829	0.244392	-0.000752005	-1.03229
Ctnna1	Catenin alpha-1	641		1	-0.286661	-0.737216	-0.690051	0.182068	0.410198	0.36731	0.802034	-0.0399627	0.0180132	-0.0794918
Fli1	Friend leukemia integration 1 transcription factor	39		1	0.120473	-0.439591	0.0592436	0.463988	-0.272594	-0.354665	0.415715	-0.202575	0.617785	-0.467087
Fli1	Friend leukemia integration 1 transcription factor	241		0.896684	0.240041	-0.457757	0.434275	0.190567	0.439947	-0.329573	0.593499	0.496766	-0.119425	-1.23585
Ptma	Prothymosin alpha;Prothymosin alpha, N-terminally processed;Thymosin alpha	2		1	0.0454165	-0.642948	0.33646	0.22823	0.491762	-0.22945	0.17222	-0.531318	0.801484	-0.582482
U2af2	Splicing factor U2AF 65 kDa subunit	79		1	-0.208643	-0.574877	0.0861683	-0.0806244	0.107545	0.14817	-0.0663264	0.561536	0.221759	-0.306581
U2af2	Splicing factor U2AF 65 kDa subunit	2		1	-0.546874	-0.115598	0.497056	-0.000243958	0.217294	0.120795	0.28361	-0.258066	0.810619	-0.788001
Marcks	Myristoylated alanine-rich C-kinase substrate	138		0.781404	-0.693823	-0.504097	-0.525012	-0.370739	-0.206462	-0.458095	0.857911	0.939745	0.881539	-0.0153822
Marcks	Myristoylated alanine-rich C-kinase substrate	140		0.332971	1.05056	1.61023	-0.220278	-0.370194	-0.0848726	-0.343862	-0.49374	-0.492889	0.0736142	-0.525735
Marcks	Myristoylated alanine-rich C-kinase substrate	141		0.589464	-0.641212	-1.03174	0.602911	-0.0999561	-0.243806	0.383882	0.00662797	1.01507	-0.59366	0.43538
Marcks	Myristoylated alanine-rich C-kinase substrate	112		1	0.0323379	-0.594332	-0.436705	-0.310523	0.211413	-0.249361	1.12913	0.338908	0.160529	-0.204021
Marcks	Myristoylated alanine-rich C-kinase substrate	122		0.947794	-0.298652	-0.23952	0.504243	-0.686575	-0.356646	0.772625	0.0479966	-0.139074	0.879876	-0.495255
Marcks	Myristoylated alanine-rich C-kinase substrate	246		1	-0.628935	-0.726261	0.210779	-0.596902	0.331922	0.630209	0.869174	0.160182	0.182083	-0.260848
Marcks	Myristoylated alanine-rich C-kinase substrate	76		1	-0.965501	-0.552974	-0.0543819	-0.117095	-0.114782	0.383288	0.278733	0.597544	0.615375	-0.181057
Marcks	Myristoylated alanine-rich C-kinase substrate	27		0.951219	-0.123475	-0.153104	-0.18971	-0.137195	-0.111266	0.00944715	-1.4161	0.472222	0.69789	0.483743
Marcks	Myristoylated alanine-rich C-kinase substrate	29		1	-0.185641	-0.112167	-0.0620221	-0.0334579	-0.140067	0.0418459	-0.222614	0.141592	0.257511	0.180802
Marcks	Myristoylated alanine-rich C-kinase substrate	171		1	-0.0195178	-0.190367	0.651984	0.230283	-0.432899	-0.809181	0.49111	0.15006	-0.4169	0.475385
Marcks	Myristoylated alanine-rich C-kinase substrate	163		0.924552	-0.740614	-0.579759	-0.401057	-0.581857	0.578836	0.273531	-0.416644	0.867508	0.362066	0.433334
Marcks	Myristoylated alanine-rich C-kinase substrate	46		0.120589	0.270366	-0.137	0.372026	0.174028	0.116232	0.353101	-0.561904	0.520609	0.736005	-1.89612
Csf2rb2	Interleukin-3 receptor class 2 subunit beta	564		0.998835	0.118421	0.807802	0.189958	0.125142	0.0612178	0.116912	-1.15835	0.440163	-0.596956	-0.129149
Csf2rb	Cytokine receptor common subunit beta	790		0.861979	-0.625933	-0.416793	0.0177027	0.0657311	-0.416634	-0.273696	1.65536	-0.0757711	0.229459	0.0504816
Csf2rb	Cytokine receptor common subunit beta	565		0.931276	-0.484637	-0.176147	-0.184543	0.405252	0.8452	-0.472831	0.75441	0.35507	-0.818594	0.0865507
Man2a1	Alpha-mannosidase 2	80		1	-0.587191	0.33778	-0.747547	-0.0809492	0.167503	-0.507957	0.702093	0.397014	0.24216	0.19205
Man2a1	Alpha-mannosidase 2	82		1	0.0502033	-0.0544003	0.152875	-0.381795	0.190576	0.310341	0.364457	0.200317	-0.792678	0.12348
Map4	Microtubule-associated protein 4	617		0.93087	-0.282259	-0.12355	0.00393829	-0.734889	-0.674876	0.395547	0.490274	-0.157928	1.08297	-0.0752858
Map4	Microtubule-associated protein 4;Uncharacterized protein C3orf20 homolog	667;899		1	-0.470597	0.0551357	-0.290144	-0.120989	-0.0665615	-0.00505907	-0.177397	0.597022	0.502616	-0.143769
Map4	Microtubule-associated protein 4	785		0.990108	-0.0902662	-1.12908	0.207803	0.260466	-0.520026	0.573242	-0.153891	0.109323	0.653513	-0.309882
Map4	Microtubule-associated protein 4	517		1	0.073692	0.0456892	0.170716	0.0611122	0.204389	0.239347	0.633093	0.36033	-0.691279	-0.833618
Map4	Microtubule-associated protein 4	345		1	-0.403118	-0.430966	-0.0311563	0.0308151	-0.214593	0.300973	-0.429711	0.805506	-0.25373	0.349374
Map4	Microtubule-associated protein 4	901		0.98117	-0.694866	-0.434196	-0.532493	-0.366996	0.561604	0.62135	-0.181485	0.697777	0.408116	-0.225453
Map4	Microtubule-associated protein 4	99		1	0.259235	0.226073	0.46013	0.227824	0.282907	-0.369478	-0.466937	-0.360477	0.217315	-0.351049
Map4	Microtubule-associated protein 4	871		1	-0.950453	0.0914862	0.312008	0.214983	0.352395	0.256794	-0.0167419	0.132073	0.0159596	-0.223718
Map4	Microtubule-associated protein 4	506		0.95589	-0.564819	-0.673841	-0.224419	-0.960586	0.43103	0.095126	0.700953	0.665036	0.837634	-0.247682
Map4	Microtubule-associated protein 4	512		0.311913	-0.382261	-0.932625	0.0868711	-0.0998239	0.447032	0.614898	0.626066	0.808415	0.431531	-1.54327
Map4	Microtubule-associated protein 4	1046		1	-0.328628	-0.765717	0.0918241	-0.0717941	0.395159	0.504922	0.254208	0.17308	-0.142605	-0.116581
Map4	Microtubule-associated protein 4	914		1	-0.448692	-0.593057	-0.0125233	0.199168	0.57181	0.266372	-0.212842	0.227582	0.37483	-0.434302
Rpl3	60S ribosomal protein L3	13		1	0.43903	-0.000327642	0.621369	-0.262655	0.0179248	0.228626	0.283351	-0.0274685	-0.456895	-0.612375
Braf	Serine/threonine-protein kinase B-raf	766		1	0.0852917	-0.842206	0.917471	0.0945671	0.123964	0.0209359	0.44295	-0.224411	-0.0932918	-0.364727
Braf	Serine/threonine-protein kinase B-raf	348		0.982617	-0.722712	-0.217466	0.57806	-0.532817	-0.2782	0.00275151	0.834129	0.480897	0.507824	-0.423337
Apex1	DNA-(apurinic or apyrimidinic site) lyase;DNA-(apurinic or apyrimidinic site) lyase, mitochondrial	18		0.824793	-0.375585	-1.71984	0.394363	-0.0926553	0.266795	0.130179	-0.0778318	0.666834	0.587523	-0.0639124
Marcksl1	MARCKS-related protein	151		0.275773	-0.778745	-0.966236	-0.95847	-0.485095	-0.383606	-0.0045599	0.0706746	0.934832	1.04047	0.971325
Marcksl1	MARCKS-related protein	22		1	-0.219654	0.178297	-0.405879	0.020166	-0.371123	0.166186	-0.367972	0.261444	0.368137	0.12873
Marcksl1	MARCKS-related protein	104		1	-0.0165799	-0.0496913	-0.833309	-0.326186	-0.360971	-0.069173	-0.0486852	0.334173	0.621861	0.425398
Marcksl1	MARCKS-related protein	36		1	-0.137992	-0.110111	0.0164829	-0.605477	-0.635092	0.0072637	0.526781	0.346163	0.715477	-0.17398
Rxra	Retinoic acid receptor RXR-alpha	22		1	-0.338023	0.553099	0.917684	-0.0995573	-0.634572	0.103652	0.765679	0.0368444	-0.372849	-0.531485
Kif3a	Kinesin-like protein KIF3A	689		0.666555	-1.16832	-0.627781	-0.518405	-0.253829	0.572174	1.08506	0.78715	-0.088971	0.0349743	0.231239
Prkcd	Protein kinase C delta type;Protein kinase C delta type regulatory subunit;Protein kinase C delta type catalytic subunit	662		1	-0.28518	-0.460267	0.332122	-0.546114	0.225469	0.431306	-0.414812	0.655845	0.376444	-0.394185
Prkcd	Protein kinase C delta type;Protein kinase C delta type regulatory subunit;Protein kinase C delta type catalytic subunit	643		1	-0.31661	-0.633311	0.518524	-0.00492362	0.600964	0.431257	0.369377	-0.381122	0.183909	-0.554176
Ptpn6	Tyrosine-protein phosphatase non-receptor type 6	10		1	-0.29467	-0.599191	0.333941	-0.358145	0.598847	-0.0662083	0.687034	0.317241	0.02143	-0.385121
Ptpn6	Tyrosine-protein phosphatase non-receptor type 6	138		1	-0.374578	0.170166	0.175967	-1.08008	0.257922	-0.170474	1.01325	0.257909	0.273801	-0.119557
Ptpn6	Tyrosine-protein phosphatase non-receptor type 6	140		1	-0.56851	-0.411244	0.126394	-0.945955	0.399785	0.380718	0.868196	0.266966	0.230677	-0.101245
Ptpn6	Tyrosine-protein phosphatase non-receptor type 6	528		1	-0.11662	-0.347578	0.448696	-0.0429316	0.998772	0.210407	0.0898321	-0.147025	-0.0403421	-0.75578
Ptpn6	Tyrosine-protein phosphatase non-receptor type 6	40		1	-0.305862	-0.38336	-0.367259	-0.225408	0.49622	-0.331179	0.320688	0.154127	0.151649	0.506955
Ptpn22	Tyrosine-protein phosphatase non-receptor type 22	687		1	-0.137521	0.42471	-0.0573732	0.213179	-0.708746	-0.254946	0.433788	0.0679813	0.783863	-0.741841
Ptpn22	Tyrosine-protein phosphatase non-receptor type 22	452		1	0.000317508	0.189537	0.118245	-0.108121	0.631013	0.247428	-0.792275	0.349223	-0.221838	-0.3769
Msr1	Macrophage scavenger receptor types I and II	32		0.716026	-0.440079	-0.508626	0.139859	-0.755508	0.953928	0.408214	-0.845495	0.699244	-0.0247296	0.30811
Cdk4	Cyclin-dependent kinase 4	300		0.848319	-0.988038	0.639126	-0.0880973	-0.417836	0.109915	-0.50362	-0.155713	0.606135	0.695841	0.228595
Nktr	NK-tumor recognition protein;Putative peptidyl-prolyl cis-trans isomerase	379		1	-0.337068	-0.289265	0.554584	0.0506832	-0.703714	0.362124	1.09524	-0.325378	0.161472	-0.40447
Nktr	NK-tumor recognition protein;Putative peptidyl-prolyl cis-trans isomerase	1139		1	-0.0295234	-0.22715	-0.426683	-0.493847	0.356698	0.568249	-0.0677571	-0.0255503	0.585187	-0.330846
Nktr	NK-tumor recognition protein;Putative peptidyl-prolyl cis-trans isomerase	1195		0.888014	0.0557674	-1.30255	0.165884	0.221389	-0.105316	-0.106178	-0.402901	0.413858	0.921356	-0.27253
Nktr	NK-tumor recognition protein;Putative peptidyl-prolyl cis-trans isomerase	615		1	0.199583	0.231675	-0.226798	0.568668	0.181233	-0.66454	-0.58551	0.387794	-0.532909	0.340953
C5ar1	C5a anaphylatoxin chemotactic receptor 1	325		1	-0.478691	-0.655901	0.0180711	0.349057	0.0221975	0.298261	0.057673	-0.232221	0.384598	0.0974651
C5ar1	C5a anaphylatoxin chemotactic receptor 1	328		1	0.274598	0.368427	0.474275	-0.375548	0.284462	-0.319188	0.39144	0.312463	-0.556292	-0.474985
C5ar1	C5a anaphylatoxin chemotactic receptor 1	333		1	-0.296704	-1.13733	-0.188388	-0.46043	0.276412	-0.00608016	0.635896	0.163568	0.567634	0.342066
C5ar1	C5a anaphylatoxin chemotactic receptor 1	339		0.770731	-1.20259	-0.822938	-0.331417	-0.16681	-0.171467	0.103624	0.336157	0.993002	0.889881	0.125142
C5ar1	C5a anaphylatoxin chemotactic receptor 1	344		1	-0.42066	-0.221456	0.175504	-0.189062	-0.234303	-0.270396	-0.276644	0.0480359	0.134165	1.11559
Ctnnd1	Catenin delta-1	920		0.848284	0.572497	0.121782	0.570741	-0.486147	0.853407	0.549898	-0.503226	-0.509035	0.101379	-1.01062
Ctnnd1	Catenin delta-1	268		0.841511	-0.449852	-0.0957731	0.792508	0.777864	0.790565	-0.678777	-0.70489	-0.302969	-0.451642	0.518568
Rbpj	Recombining binding protein suppressor of hairless	8		1	0.703248	0.863856	-0.211627	-0.178631	-0.235889	-0.197299	-0.118511	-0.237534	0.194155	-0.507311
Prkar2b	cAMP-dependent protein kinase type II-beta regulatory subunit	83		1	-0.0961243	0.0598552	1.19674	-0.136782	0.257241	-0.121161	-0.18365	0.14261	-0.17878	-0.607402
Akt1	RAC-alpha serine/threonine-protein kinase	124		1	0.267382	-1.08196	0.397726	0.363044	-0.406232	-0.227753	0.577535	-0.529213	0.35819	0.153047
Akt1	RAC-alpha serine/threonine-protein kinase	129		0.753346	0.669964	0.534387	-0.892145	-0.0155268	0.054631	-0.230687	0.912592	-0.0310161	0.277868	-1.1277
Ptger4	Prostaglandin E2 receptor EP4 subtype	273		1	-0.663872	-0.0456159	0.22014	-0.378631	-0.0681467	-0.499477	0.477976	0.168507	0.686808	0.248399
Kif4	Chromosome-associated kinesin KIF4	788		1	0.089693	0.372149	-0.169953	0.148847	-0.330541	-0.385945	-0.120002	0.0702134	0.433313	-0.169862
Kif4	Chromosome-associated kinesin KIF4	802		1	-0.254217	-0.110851	-0.731853	0.101976	-0.0140491	0.44154	-0.523116	0.398002	0.578345	-0.230745
Nedd1	Protein NEDD1	379		1	-1.05781	0.364997	0.619754	0.243423	0.476243	0.390842	0.4676	-0.279488	-0.199678	-0.543734
Pola1	DNA polymerase alpha catalytic subunit	215		1	-0.682702	-0.0954771	-0.171451	0.135511	-0.187403	-0.107452	0.339011	0.405242	0.227379	0.108512
Pola2	DNA polymerase alpha subunit B	125		0.817799	-0.218691	0.124816	-0.385941	-0.190616	0.72466	-0.659726	-0.0257283	-0.5881	1.2201	0.108677
Pola2	DNA polymerase alpha subunit B	126		1	-0.0148605	0.205894	-0.305271	0.319064	0.283962	-0.456927	0.00992479	0.354616	-0.110324	-0.237452
Mif	Macrophage migration inhibitory factor	14		1	0.485358	-0.290787	0.023854	-0.348373	-0.977976	0.253655	0.72065	0.403047	-0.378987	-0.021506
Usp4	Ubiquitin carboxyl-terminal hydrolase 4	675		0.951468	-0.445749	0.289782	0.423453	0.373376	0.440001	0.25588	0.411585	-0.475961	-1.10531	0.224145
Usp4	Ubiquitin carboxyl-terminal hydrolase 4	680		1	-0.370105	0.094441	-0.0837114	0.483065	0.546437	-0.332172	-0.477576	-0.0586204	0.581586	-0.363446
Rab5c	Ras-related protein Rab-5C	205		0.515138	0.0449702	-0.593751	0.452619	-0.0274425	0.588278	-0.186459	1.80661	-0.343986	-0.625024	-0.552377
Rab5c	Ras-related protein Rab-5C	124		0.491183	-0.617212	-1.20547	0.0124296	0.43846	0.897148	0.334044	0.479676	0.982562	-0.106573	-1.16912
Rab6a;Rab6b	Ras-related protein Rab-6A;Ras-related protein Rab-6B	2;2		0.981653	0.462292	-0.639922	0.170434	-0.546366	-0.62152	-0.171776	1.13383	0.498543	0.129762	-0.404571
Rab6a	Ras-related protein Rab-6A	184		0.903181	0.326456	-0.744498	-0.594628	-0.207631	0.756477	0.948589	-0.0599961	-0.13153	-0.704464	0.250564
P2ry2	P2Y purinoceptor 2	329		1	-0.435725	0.0687682	-0.00601223	-0.370167	-0.0722042	0.0193211	0.0819223	0.462284	0.103557	0.166375
Pdha1	Pyruvate dehydrogenase E1 component subunit alpha, somatic form, mitochondrial	232		1	0.28727	-0.1124	0.786587	0.295131	0.289933	-0.0694723	0.188794	-0.0855804	-0.0886752	-1.20336
Pdha1	Pyruvate dehydrogenase E1 component subunit alpha, somatic form, mitochondrial	293		0.784085	-0.659316	0.228897	-0.229912	0.71529	-0.639399	0.0488049	0.35761	0.908711	-0.0855298	-0.715857
Fbl	rRNA 2'-O-methyltransferase fibrillarin	130		1	-0.363917	0.233562	-0.235211	-0.403208	0.411524	-0.277124	0.44651	0.436545	0.40126	-0.435845
Canx	Calnexin	582		1	0.479021	-0.419521	0.469194	-0.204658	-0.0462064	-0.164167	0.594444	-0.661959	-0.0320526	0.135382
Canx	Calnexin	553		0.996153	0.194907	-1.16718	0.316314	0.404797	-0.114287	0.308811	-1.02913	0.2302	-0.022239	0.379238
Canx	Calnexin	563		1	0.283489	-1.17419	0.607283	0.70576	-0.156808	0.345569	0.106924	-0.096781	0.112083	-0.887526
Rfc1	Replication factor C subunit 1	244		0.774409	-1.15104	-0.212514	-0.365123	-0.377865	-0.197585	-0.0785504	0.681013	0.753587	0.68733	0.237195
Rfc1	Replication factor C subunit 1	363		0.947173	0.0166985	-1.15838	-0.730275	0.150293	-0.217966	0.226517	0.196772	0.121447	0.859062	0.0583738
Rfc1	Replication factor C subunit 1	365		1	0.24932	-0.202032	0.0984906	0.104231	-0.362601	-0.386971	0.168295	-0.634166	0.94657	-0.0555978
Rfc1	Replication factor C subunit 1	1090		0.760168	0.490439	0.50544	0.573721	0.515771	-1.03519	-0.962527	0.496915	-0.0528435	-0.262279	-0.134222
Rfc1	Replication factor C subunit 1	357		0.94492	0.528002	1.22636	-0.219852	-0.464874	0.223909	0.271236	-0.452684	-0.325153	-0.0656518	-0.52686
Ercc5	DNA repair protein complementing XP-G cells homolog	341		1	0.165681	-0.50292	-0.517195	0.00637266	0.495031	-0.138551	-0.333572	-0.0719932	0.302757	0.379725
Ercc5	DNA repair protein complementing XP-G cells homolog	384		1	-0.550412	0.150144	-1.00394	-0.434405	0.386751	0.573038	0.538414	0.206721	0.381003	-0.229475
Ptpn1	Tyrosine-protein phosphatase non-receptor type 1	295		1	0.102183	-0.13921	-0.513864	0.498123	0.124991	-0.0750076	0.214331	0.0496423	0.0712296	-0.410857
Ptpn1	Tyrosine-protein phosphatase non-receptor type 1	392		0.890051	0.0503585	0.268023	0.423009	-1.36754	0.365608	0.452096	0.545853	-0.165853	-0.232729	0.0617949
Ptpn12	Tyrosine-protein phosphatase non-receptor type 12	673		0.766752	-0.200517	-1.03791	-0.373086	-0.0412017	-0.305388	-0.681587	0.660408	0.591082	0.595233	0.528973
Ptpn12	Tyrosine-protein phosphatase non-receptor type 12	734		0.749943	0.315269	-0.985235	-0.314557	0.463265	-1.1727	0.0142413	0.661779	0.681792	0.0177831	-0.134319
Ptpn12	Tyrosine-protein phosphatase non-receptor type 12	434		1	-0.636869	-0.389394	0.699317	-0.385826	1.18348	-0.0204061	0.4117	-0.0164532	-0.122414	-0.24686
Ptpn12	Tyrosine-protein phosphatase non-receptor type 12	396		0.909312	0.118594	-1.35745	-0.425611	0.257118	0.147118	0.268799	0.657098	-0.0874318	0.57961	-0.402557
Ptpn12	Tyrosine-protein phosphatase non-receptor type 12	331		0.81452	0.423898	-1.42749	0.346825	-0.108463	0.494007	0.162598	0.294077	-0.301006	-0.590574	0.632982
Ptpn12	Tyrosine-protein phosphatase non-receptor type 12	448		1	-0.508289	-0.633831	-0.358421	-0.307786	-0.152002	-0.20312	0.618756	0.445156	0.360563	0.6076
Ptpn12	Tyrosine-protein phosphatase non-receptor type 12	748		0.99801	-0.142897	0.0538336	0.00595688	-0.733366	-0.172932	-0.0492392	1.38667	0.261192	-0.0375086	-0.253331
Ptpn12	Tyrosine-protein phosphatase non-receptor type 12	555		0.534996	-0.491202	-0.22467	-0.0954433	-0.557193	-0.0529135	-1.22353	0.797516	0.62953	0.76392	0.560107
Rpl18	60S ribosomal protein L18	130		1	0.140042	0.0500567	0.0155936	0.361158	0.310772	0.524879	-0.472164	-0.700387	-0.778285	0.5244
Btk	Tyrosine-protein kinase BTK	55		1	-0.348842	-0.244926	0.472063	-0.0578746	-0.33579	0.0891155	-0.583101	0.403014	0.317685	0.115717
Cpox	Coproporphyrinogen-III oxidase, mitochondrial	101		0.68894	0.833155	0.924954	0.00424774	-0.436011	-1.10565	0.577376	-0.320473	-0.0541745	-0.534901	-0.0127537
Gnl1	Guanine nucleotide-binding protein-like 1	51		0.861101	0.287726	-0.216213	0.666624	0.692505	0.0160153	-0.601765	-0.779528	0.657827	-0.268392	-0.533075
Lig1	DNA ligase 1	188		1	0.0894802	0.156658	-0.0258076	0.184287	-0.85177	-0.402815	0.10887	0.344281	0.277141	-0.0333368
Lig1	DNA ligase 1	51		1	-0.125197	0.109759	-0.285061	0.0857105	-0.0849722	0.147904	-0.253227	0.192317	0.159398	-0.0750074
Hsf1	Heat shock factor protein 1	314		0.985016	-1.19689	-0.135335	0.670252	-0.310419	0.248888	0.0645612	-0.114974	0.0852231	0.790553	0.0653435
Traf1	TNF receptor-associated factor 1	63		0.404019	-0.971303	-0.0361561	-1.14028	-0.13761	-0.235355	-0.550957	0.551639	0.733134	0.777399	0.794451
Traf2	TNF receptor-associated factor 2	11		0.370773	-0.694192	0.108214	-0.285109	-0.561182	-0.222108	-0.579414	1.04829	0.363523	1.42816	-0.443864
Fyn	Tyrosine-protein kinase Fyn	21		1	-0.390592	0.154984	-0.140078	0.0856653	0.160826	0.050341	0.209797	0.312925	-0.0279721	-0.319513
Cdkn1a	Cyclin-dependent kinase inhibitor 1	78		1	-0.344134	0.198724	-0.297136	-0.064043	0.373557	-0.212708	-0.742409	0.0507671	0.524238	0.396329
Cap1	Adenylyl cyclase-associated protein 1	307		1	-0.542325	0.278821	-0.306487	-0.865908	0.240962	0.251822	0.270475	0.20446	0.281184	0.30794
Cap1	Adenylyl cyclase-associated protein 1	309		1	-0.24419	-0.802711	-0.664209	-0.332054	0.496912	0.34531	0.00292147	0.206006	0.559551	0.190691
Cap1	Adenylyl cyclase-associated protein 1	254		1	-1.25503	0.266899	0.0565288	0.229044	0.333434	0.031646	-0.183055	0.497341	-0.0965261	0.238172
Tkt	Transketolase	295		1	-0.458865	0.457285	0.682406	-0.566153	0.476762	0.35048	-0.309655	0.216677	-0.196926	-0.325311
Chd1	Chromodomain-helicase-DNA-binding protein 1	1678		0.797245	-0.0501502	-0.892313	0.0826624	0.742864	-0.513704	0.891133	0.0323325	-0.403195	-0.629433	0.417048
Chd1	Chromodomain-helicase-DNA-binding protein 1	1690		1	0.0687027	-1.08293	-0.0138297	-0.179369	0.0602693	-0.449106	0.283302	0.516753	0.115717	0.492192
Vps26a	Vacuolar protein sorting-associated protein 26A	315		0.760022	-1.10673	-0.051254	0.128436	-0.767925	0.162198	-0.287641	0.371386	0.207741	1.17445	0.322036
Ighmbp2	DNA-binding protein SMUBP-2	797		1	0.541301	-0.962783	0.396837	-0.452209	0.619267	0.387122	-0.817266	0.14849	0.160846	-0.212591
Ighmbp2	DNA-binding protein SMUBP-2	800		0.815716	0.0932829	-0.578209	-0.222021	-0.824783	-0.419491	-0.394422	1.08947	0.892682	0.321488	0.00943972
Id2	DNA-binding protein inhibitor ID-2	16		1	-0.718577	-0.366073	-0.216313	-0.177039	0.864228	-0.367106	0.682744	0.318143	0.301593	-0.0804521
Bcl6	B-cell lymphoma 6 protein homolog	308		0.992731	0.22485	-0.876131	-0.156611	0.34032	0.698651	0.69417	-0.0219827	-0.165817	-0.146229	-0.680238
Bcl6	B-cell lymphoma 6 protein homolog	309		0.739114	0.409084	0.0822644	0.01527	0.283826	-0.835814	0.825381	-0.580271	0.69612	-0.589519	-0.635978
Bcl6	B-cell lymphoma 6 protein homolog	405		1	0.573177	-0.457461	-0.749382	-0.621692	0.0151865	0.323567	-0.262998	0.744702	0.0606024	0.0106347
Bcl6	B-cell lymphoma 6 protein homolog	331		1	0.339491	0.323823	-0.136408	-0.715771	-0.021249	0.802547	-0.331668	0.058717	-0.240751	-0.120106
Bcl6	B-cell lymphoma 6 protein homolog	334		0.598234	0.381457	1.16714	0.581985	0.211709	0.251594	0.503094	0.0739325	-0.416523	-1.06417	-1.17155
Kdm5c	Lysine-specific demethylase 5C	897		1	0.0256602	-0.0456197	0.20881	-1.01431	0.560484	0.650806	0.284696	0.174402	-0.229311	-0.363526
Slc11a1	Natural resistance-associated macrophage protein 1	6		1	-0.496505	0.0588604	0.207513	-0.388882	-0.49374	0.286777	-0.011022	0.397484	0.0351229	0.344795
Elk3	ETS domain-containing protein Elk-3	398		1	0.0193284	-0.0220289	0.11311	-0.500365	-0.3316	0.0266454	-0.19632	0.489914	0.620171	-0.328064
Cd86	T-lymphocyte activation antigen CD86	285		0.689022	0.491467	0.572128	0.438366	-0.626347	0.670702	-0.561125	-0.109968	-0.984213	0.61426	-0.112463
Foxk1	Forkhead box protein K1	285		0.854112	-0.156317	-1.68076	-0.254266	0.281349	-0.409004	0.167136	0.659552	0.572478	0.479497	-0.0807795
Foxk1	Forkhead box protein K1	199		0.768544	-0.629845	-0.319745	-0.620164	0.0859175	-0.711722	-0.410947	0.11752	1.08667	0.511572	0.507219
Foxk1	Forkhead box protein K1	431		1	-0.782518	-0.749344	0.233677	0.18024	0.156511	0.279898	0.554173	-0.1143	-0.0270211	0.317437
Foxk1	Forkhead box protein K1	87		0.936463	-0.914964	-0.137155	-0.779439	0.23418	0.284497	0.0231091	0.178556	-0.364661	0.790177	0.572315
Foxk1	Forkhead box protein K1	406		1	-0.362854	0.799892	-0.591899	0.265286	-0.0441572	-0.385272	0.263226	-0.517173	0.512948	0.16677
2002-09-01	Septin-2	218		1	-0.343829	-0.0838886	0.39577	-0.264522	-0.0361242	0.551017	0.0963463	0.402085	0.186579	-0.810408
Stat1	Signal transducer and activator of transcription 1	727		0.869854	-0.293826	-0.166586	0.405314	-0.613128	0.402101	-0.806748	0.932803	0.233791	-0.339571	0.639257
Stat5a	Signal transducer and activator of transcription 5A	779		1	-0.520761	0.0997309	-0.516588	-0.844189	0.259882	0.212199	0.593392	0.555457	0.44838	-0.1784
Eps15	Epidermal growth factor receptor substrate 15	721		0.567439	-0.187266	-0.897431	0.156596	-0.375743	-0.582788	-0.343636	1.66674	0.142102	0.0667645	0.440441
Eps15	Epidermal growth factor receptor substrate 15	798		1	-0.493965	-0.668404	0.355393	-0.291463	-0.712617	0.346025	0.351803	0.465358	0.383782	0.0956311
Eps15	Epidermal growth factor receptor substrate 15	816		0.260191	-0.815485	-0.887674	-0.53313	-0.841243	-0.209886	-0.478565	1.44931	0.999648	0.803352	0.468328
Eps15	Epidermal growth factor receptor substrate 15	324		1	0.069796	-0.0240179	-0.329813	0.0365048	0.323652	-0.544017	0.951613	-0.0852594	-0.0042159	-0.163884
Eps15	Epidermal growth factor receptor substrate 15	561		0.988224	-0.125941	-0.90275	-0.513799	-0.170735	0.11875	0.258211	0.370738	1.04035	0.115619	-0.422206
Eps15	Epidermal growth factor receptor substrate 15	562		0.996065	-0.288629	-0.596626	-0.516519	-0.415588	0.155262	0.291799	0.522648	1.03137	0.0926045	-0.385128
Htt	Huntingtin	620		0.982509	-0.0326389	0.0874621	-0.540523	0.437668	0.263249	-0.741825	0.620214	0.242246	-0.884692	0.656439
Cct8	T-complex protein 1 subunit theta	537		1	0.0543918	-0.251053	0.194873	-0.190769	-0.00771519	0.116496	-0.150359	0.0599394	0.149243	-0.0286095
Hist1h1e	Histone H1.4	36		1	-0.476433	0.133143	0.0359968	-0.558059	-0.638791	0.0946601	0.184698	0.60677	0.663457	-0.11668
Hist1h1e	Histone H1.4	2		1	-0.404516	-0.459808	0.510131	0.171628	0.459311	0.281423	0.175714	-0.228867	0.65472	-0.988398
Hist1h1a	Histone H1.1	2		0.170367	0.239184	0.0532224	0.631374	-0.395045	0.573387	-0.157925	0.589931	-1.80778	0.715102	0.0205303
Hist1h1b	Histone H1.5	2		0.813909	-0.126145	-1.74555	0.349456	0.120657	0.38868	0.261095	0.25992	0.114789	0.483997	-0.293775
Hist1h1d	Histone H1.3	2		1	-0.0866798	-0.103988	0.391263	-0.1374	0.392791	-0.987043	0.25932	0.136509	0.622889	-0.252815
Itgav	Integrin alpha-V;Integrin alpha-V heavy chain;Integrin alpha-V light chain	1042		1	-0.170906	0.0315996	0.55667	-0.396596	-0.068535	0.00739238	0.517401	-0.337063	0.0158866	0.103434
Sox18	Transcription factor SOX-18	4		1	0.213486	-0.0864509	0.246363	0.0395184	1.1756	-0.427596	0.0190231	-0.182486	0.220667	-0.879487
Crebbp	CREB-binding protein	1077		0.932726	-0.874882	-0.453136	0.0656665	-0.000181247	-0.716239	0.234105	1.27571	0.413747	0.5629	-0.464693
Crebbp	CREB-binding protein	2064		1	-0.369721	-0.039999	0.454866	0.24804	0.461615	-1.01503	0.564179	-0.0461872	0.366827	-0.264427
Crebbp	CREB-binding protein	120		1	-0.381811	-0.0393882	0.552867	0.576678	0.199267	0.0527001	-0.107986	-0.0108411	-0.923811	0.233516
Man1a1	Mannosyl-oligosaccharide 1,2-alpha-mannosidase IA	11		1	0.0156036	0.794387	-0.562444	-0.105289	0.138564	0.132869	0.47413	-0.0815713	-0.0853486	-0.509742
Man1a1	Mannosyl-oligosaccharide 1,2-alpha-mannosidase IA	12		1	-0.305576	0.379861	0.209528	0.636801	-0.209551	-0.377161	0.671315	-0.364844	-0.0424237	-0.335161
Rangap1	Ran GTPase-activating protein 1	444		1	-0.182364	0.630361	-0.418906	-0.115293	-0.0365608	0.240404	0.755293	-0.173336	0.261796	-0.728848
Sipa1	Signal-induced proliferation-associated protein 1	72		0.531518	-0.349166	0.0121379	-0.427492	0.265961	-1.31433	0.0882012	0.509193	1.0195	0.465848	-0.574969
Sipa1	Signal-induced proliferation-associated protein 1	812		1	0.497321	-0.210756	-0.0568754	-0.535356	0.742891	0.292077	0.283325	-0.669697	-0.057314	-0.0959704
Sipa1	Signal-induced proliferation-associated protein 1	879		0.620065	0.237634	-0.104774	-0.664467	-0.773675	-0.653477	-0.551278	0.755582	0.956829	0.120991	0.509852
Sipa1	Signal-induced proliferation-associated protein 1	53		0.342864	0.0675147	0.231042	0.359844	0.0922652	0.278816	0.242236	0.58983	0.365449	-1.89401	0.0318921
Sipa1	Signal-induced proliferation-associated protein 1	65		0.123552	-0.214004	0.217332	-0.599669	0.374759	0.462417	-1.86623	0.0403674	0.1401	0.753429	0.721612
Cdkn1b	Cyclin-dependent kinase inhibitor 1B	178		0.995943	-0.527442	-0.687643	0.350328	-0.172114	0.0964614	-0.0967221	0.935356	0.575377	0.4495	-0.749476
Cdkn1b	Cyclin-dependent kinase inhibitor 1B	10		1	-0.154145	-0.557433	0.342788	-0.175907	0.0952331	0.26117	0.206961	0.339554	0.0360902	-0.372424
Vps4b	Vacuolar protein sorting-associated protein 4B	102		0.910709	-0.113006	-0.199349	-0.0422437	0.184494	0.773126	-1.08687	0.634466	0.0108646	-0.462496	0.592517
Rab11b	Ras-related protein Rab-11B	190		0.677856	-0.0501034	-0.0331802	1.43846	-0.273193	-0.191055	0.361836	-0.340244	-0.479387	0.627481	-0.842118
Rab11b;Rab11a	Ras-related protein Rab-11B;Ras-related protein Rab-11A	42;42		1	-0.530043	-0.427983	0.545792	-0.0401554	0.190783	0.0418549	0.588554	0.405322	0.343491	-0.89333
Ier3	Radiation-inducible immediate-early gene IEX-1	18		0.288538	-0.50924	-0.0644192	0.941671	-0.812005	0.738108	-0.0484439	1.68615	-0.281101	0.14532	-0.970663
Pla2g4a	Cytosolic phospholipase A2;Phospholipase A2;Lysophospholipase	515		1	-0.129189	-0.278543	0.270135	0.502258	0.147851	0.380296	-0.321687	-0.0497039	-0.155762	-0.411216
Pla2g4a	Cytosolic phospholipase A2;Phospholipase A2;Lysophospholipase	437		1	0.170376	0.298248	0.268242	-1.2626	0.277683	0.0818067	-0.0219547	0.0615501	0.0687408	0.263459
Pla2g4a	Cytosolic phospholipase A2;Phospholipase A2;Lysophospholipase	505		0.832996	-0.182067	-1.31891	0.28043	-0.0661858	-0.04991	-0.198708	1.23675	-0.417107	0.24645	0.506347
Capza1	F-actin-capping protein subunit alpha-1	9		1	-0.77282	-0.627568	0.190613	-0.261846	0.533451	0.517968	0.842366	0.256297	0.00161941	-0.445365
Capza2	F-actin-capping protein subunit alpha-2	9		1	-0.145277	-0.414833	0.40897	-0.0952219	0.0498455	0.287483	0.0105151	-0.0981694	0.483491	-0.473179
Capzb	F-actin-capping protein subunit beta	263		1	-0.135855	-0.115099	0.0208783	-0.307841	0.255214	0.470887	-0.0392523	0.336193	0.0607426	-0.515432
Capzb	F-actin-capping protein subunit beta	184		1	0.0982681	0.82144	-0.692777	-0.375147	0.404264	0.108417	0.185666	0.430595	-0.412607	-0.38847
Map2k4	Dual specificity mitogen-activated protein kinase kinase 4	78		0.83285	0.302274	0.765672	0.158925	-0.297676	1.08154	-0.234395	-1.08873	-0.402166	0.0116713	-0.0677653
Mapk14	Mitogen-activated protein kinase 14	2		1	-0.147346	-0.641422	-0.279313	0.646596	-0.772946	0.306769	0.68949	0.223162	-0.0509214	-0.225117
Rpl6	60S ribosomal protein L6	21		0.872986	-0.0676669	0.284001	0.516806	-1.30849	0.245797	0.0485394	-0.266871	-0.314035	0.36247	0.694385
Rpl6	60S ribosomal protein L6	150		1	-0.359635	-0.0350516	-0.273373	-0.275039	0.598108	-0.30581	0.00501923	0.760568	-0.0867902	0.0456798
Rpl6	60S ribosomal protein L6	151		1	-0.541297	-0.241546	-0.194384	-0.307614	0.613403	-0.291176	0.00867855	0.702763	0.530996	-0.233286
Fosl2	Fos-related antigen 2	120		1	0.327536	0.47438	-0.695108	-0.191172	0.308609	-0.134091	-0.345416	-0.0528447	-0.23688	0.480603
Fosl2	Fos-related antigen 2	200		1	-0.762333	0.126098	0.0371043	-0.561418	0.621164	0.125314	-0.254717	0.359621	0.668799	-0.227221
Fosl2	Fos-related antigen 2	308		0.598173	-0.497608	0.290901	-0.590546	-0.0900718	0.629797	-0.868619	-0.340252	-0.150974	0.243354	1.37149
Rpl13	60S ribosomal protein L13	139		0.657824	0.126439	0.371192	-0.68468	-0.319126	-0.692937	0.708147	-0.520125	0.760125	-0.743364	0.612691
Rpl13	60S ribosomal protein L13	140		1	0.0336764	-0.180615	0.146869	0.30267	0.336633	-1.35431	0.14247	0.3209	0.332703	0.0303464
Anxa5	Annexin A5	35		0.951363	0.563502	-0.898718	-0.356621	-0.042552	0.653152	0.278211	0.470772	-0.0645599	0.31286	-0.948899
Epb41	Protein 4.1	192		1	0.468157	-0.46341	-0.994065	0.507418	0.145858	-0.157312	0.243415	-0.190968	0.14174	0.0321152
Epb41	Protein 4.1	48		1	-0.833634	0.0144065	0.425098	-0.532267	0.198317	0.62089	-0.559614	0.334567	0.585845	-0.234058
Epb41	Protein 4.1	678		1	-0.217785	-0.928258	-0.0523378	-0.0419136	0.523897	0.296076	-0.232813	0.356801	0.313227	-0.189272
Epb41	Protein 4.1	86		0.423342	-0.656012	-0.275714	-0.728199	-1.01303	0.915035	0.497337	0.553975	0.342187	0.965298	-0.484601
Epb41	Protein 4.1	87		1	-0.125618	-0.812993	-0.259387	-0.0224647	-0.718765	0.351966	-0.273843	0.861523	0.0292503	0.454084
Epb41	Protein 4.1	543		1	0.225826	0.281297	-0.736199	0.501492	-0.416088	0.308049	0.722462	-0.109231	-0.241352	-0.573388
Epb41	Protein 4.1	703		0.93972	-0.349413	-0.626825	-0.0619999	0.16375	1.05289	-0.329613	-0.568099	-0.463009	0.612105	0.519203
Epb41	Protein 4.1	556		0.952028	-0.848179	-0.45226	-0.485617	-0.323637	0.0283601	-0.199543	0.312344	0.92991	0.879463	0.00986632
Epb41	Protein 4.1	94		1	-0.488854	0.0139821	0.542739	-0.261947	0.611203	0.0338226	0.474309	-0.0112705	-0.000655835	-0.50277
Epb41	Protein 4.1	97		0.121098	-1.79486	-0.200547	0.0207786	-0.233222	0.0432991	-0.0659373	1.21256	0.824251	0.438982	0.0237185
Epb41	Protein 4.1	856		1	-1.21451	-0.0227559	0.409967	0.241687	0.35202	-0.535278	0.288181	0.334647	0.38423	0.0186659
Rfx1	MHC class II regulatory factor RFX1	110		0.533446	0.259783	-0.76103	-0.651174	0.438238	-0.457862	0.924174	0.915688	-0.621987	-0.685635	0.40121
Rfx1	MHC class II regulatory factor RFX1	152		1	-0.0831136	0.820879	-0.156016	-0.215321	0.331156	-0.00622627	0.0745655	-0.0914317	-0.41251	0.00566484
Rfx1	MHC class II regulatory factor RFX1	202		0.760295	-0.787293	0.717106	-0.585148	0.775995	-0.906621	0.376161	0.183421	-0.467821	0.358135	0.188253
Lmna	Prelamin-A/C;Lamin-A/C	611		1	-0.134439	0.956009	0.803075	-0.328327	0.119265	0.317202	-0.440395	0.0433255	-0.270376	-0.705851
Lmna	Prelamin-A/C;Lamin-A/C	616		0.615448	0.707654	-0.755837	0.263554	-0.303648	-0.0632348	0.291112	0.383824	-1.35079	0.516996	0.267448
Lmna	Prelamin-A/C;Lamin-A/C	617		1	-0.0970503	-0.138351	0.310383	-0.279943	0.441533	-0.117914	0.486784	0.487989	-0.283146	-0.535196
Lmna	Prelamin-A/C;Lamin-A/C	620		0.896435	0.145815	0.0543014	0.913448	-0.467047	0.311527	0.741617	-0.212628	-0.350403	0.221627	-1.09159
Lmna	Prelamin-A/C;Lamin-A/C	407		0.887793	0.159923	1.24566	-0.64031	0.0319662	0.294396	-0.346099	-0.800684	0.291744	0.106996	-0.318824
Lmna	Prelamin-A/C;Lamin-A/C	414		0.951115	0.353943	-0.802334	-0.723727	-0.118223	0.546587	0.176107	0.974873	-0.061152	0.0617869	-0.409011
Lmna	Prelamin-A/C;Lamin-A/C	301		1	-0.165584	-0.116515	0.38557	-0.0529996	0.142003	0.628605	1.06291	-0.323118	-0.364867	-0.827515
Lmna	Prelamin-A/C;Lamin-A/C	424		0.991626	0.31253	0.114246	-0.104224	0.0192838	-0.0314783	-1.11254	0.910532	-0.223704	0.203968	0.133651
Lmna	Prelamin-A/C;Lamin-A/C	277		1	0.588519	-0.0680048	0.50009	-0.226948	-0.40089	-0.576652	-0.0915442	-0.19552	0.345063	0.110799
Lmna	Prelamin-A/C;Lamin-A/C	107		1	0.190868	0.0424405	0.431109	-0.217355	0.536841	0.523195	-0.215324	0.27711	-0.132317	-1.2378
Lmna	Prelamin-A/C;Lamin-A/C	390		1	-0.642326	0.260495	0.358508	0.376673	0.405817	-0.5256	0.262495	-0.649943	0.275172	0.200539
Lmna	Prelamin-A/C;Lamin-A/C	392		1	-0.0468256	0.218591	0.0653852	0.246655	0.0889108	-1.05634	0.0546359	0.272509	0.12004	0.143316
Lmna	Prelamin-A/C;Lamin-A/C	395		1	0.225617	-0.354088	-0.153355	-0.499187	0.527627	-0.536492	0.00750135	0.414324	0.383138	-0.00816563
Lmna	Prelamin-A/C;Lamin-A/C	12		0.611277	-0.131625	0.00912435	-0.46597	0.168326	-0.502015	-1.18196	0.0944224	0.129363	0.636876	1.02734
Lmna	Prelamin-A/C;Lamin-A/C	17		1	-0.276536	-0.0960578	-0.347397	0.141582	0.283288	0.255134	-0.380357	0.577763	0.345827	-0.638377
Lmna	Prelamin-A/C;Lamin-A/C	18		1	-0.629225	-0.644923	-0.159867	-0.227147	0.404786	-0.221733	0.166327	0.744426	0.710441	-0.201504
Lmna	Prelamin-A/C;Lamin-A/C	22		1	-0.593513	-0.265684	-0.197883	-0.251234	-0.0433157	-0.0393575	0.448034	0.89197	0.440474	-0.404203
Lmna	Prelamin-A/C;Lamin-A/C	546		1	0.0733776	-0.461564	0.197002	0.70399	-0.467334	0.00340255	0.0452978	-0.330135	-0.338262	0.402576
Lmna	Prelamin-A/C;Lamin-A/C	633		0.936843	0.427085	0.399408	-0.374438	-1.01496	-0.42064	-0.0818075	0.526028	0.477738	0.44436	-0.35018
Lmna	Prelamin-A/C;Lamin-A/C	637		0.792426	-0.955018	0.361594	-0.98279	-0.158616	0.446864	0.522125	0.809324	-0.352212	0.264029	0.203448
Lmna	Prelamin-A/C;Lamin-A/C	533		0.688501	-0.255902	0.228503	-0.910613	0.612674	0.518447	0.858239	0.926838	-0.260003	-0.930511	-0.596878
Pcnt	Pericentrin	1959		0.366841	-0.0853306	-0.69148	-0.284779	-0.601706	-0.886004	-0.363011	1.04278	1.24605	0.622124	-0.203513
Pcnt	Pericentrin	2669		1	-0.755398	-0.407529	0.229598	-0.516327	-0.189555	-0.0188763	0.764718	0.0403795	0.587361	0.364937
Pcnt	Pericentrin	1437		1	-0.344579	-0.281662	0.639814	0.52626	-0.869018	-0.199007	0.636422	-0.0525915	0.203747	-0.227996
Brca1	Breast cancer type 1 susceptibility protein homolog	831		1	-0.479771	-0.652262	-0.424831	-0.232303	0.408192	-0.377698	0.578867	0.1425	0.542001	0.472797
Brca1	Breast cancer type 1 susceptibility protein homolog	717		1	0.142416	0.294742	-0.374219	0.0161446	-0.0211803	-0.029418	-0.339615	0.289694	-0.0677607	-0.0208717
Cbr1	Carbonyl reductase [NADPH] 1	30		1	-0.510127	-0.0429773	0.871199	-0.806511	0.0764712	-0.362607	0.385152	0.0915648	0.760445	-0.140148
Slc25a4	ADP/ATP translocase 1	149		1	-0.441792	0.381388	0.293593	-0.274472	0.505468	0.243471	0.312144	-0.375255	0.562694	-0.834092
Slc25a4;Slc25a5	ADP/ATP translocase 1;ADP/ATP translocase 2;ADP/ATP translocase 2, N-terminally processed	42;42		1	-0.422191	-0.692415	0.542038	-0.182133	-0.41196	-0.0934951	0.568455	0.349723	0.454086	-0.110577
Neurod6	Neurogenic differentiation factor 6	74		1	-0.0499168	0.412664	0.133441	-0.781042	0.167826	-0.164392	0.585526	0.203867	0.0984875	-0.281596
Camlg	Calcium signal-modulating cyclophilin ligand	53		1	0.571492	0.267198	-0.669223	-0.135155	0.294786	-0.0413325	0.58296	-0.0398197	-0.436928	-0.275048
Nr2c2	Nuclear receptor subfamily 2 group C member 2	327		1	-0.0145433	0.51443	-0.637351	-0.189231	-0.192078	0.276824	-0.0109452	-0.149009	0.186009	0.134407
Nr2c2	Nuclear receptor subfamily 2 group C member 2	19		1	-0.467374	0.704732	0.643211	0.239008	0.442068	-0.0985908	0.013173	0.0669648	-0.586582	-0.505814
Nr2c2	Nuclear receptor subfamily 2 group C member 2	68		0.687092	-0.462915	0.280755	-0.690421	-0.203442	0.440095	-0.913324	1.40784	0.663379	0.184447	-0.346844
Slc11a2	Natural resistance-associated macrophage protein 2	567		0.615529	-0.212342	-0.673189	-0.049185	-0.816277	-0.160165	-0.84361	1.10339	0.600905	0.65882	0.446865
Hnrnpa1	Heterogeneous nuclear ribonucleoprotein A1	6		0.87325	0.0848337	0.0951582	0.193816	0.0260122	-1.78419	0.0480332	0.287752	0.42008	0.0650867	0.261556
Cenpc1	Centromere protein C 1	517		0.911068	0.200202	0.352204	0.0626791	0.321541	-0.026251	0.334339	0.159576	0.332582	-1.46202	-0.137798
Cenpc1	Centromere protein C 1	699		1	0.0317693	0.327172	0.111566	-0.0878304	0.186925	0.348701	0.0530701	-0.144082	-0.462724	-0.194884
Pcyt1a;Pcyt1b	Choline-phosphate cytidylyltransferase A;Choline-phosphate cytidylyltransferase B	233;233		0.975482	0.301003	0.121515	0.262031	0.195856	0.951221	0.15887	-1.44052	-0.057104	-0.421372	-0.097938
Pcyt1a	Choline-phosphate cytidylyltransferase A	319		1	-0.0239863	0.3269	-0.424103	-0.0942726	0.086218	-0.64895	0.317619	0.538222	0.0227334	-0.0237215
Pcyt1a	Choline-phosphate cytidylyltransferase A	321		0.749875	-0.0937956	0.039809	0.653247	0.56692	0.560288	-0.567969	0.316116	-0.664074	0.536919	-0.955094
Pcyt1a	Choline-phosphate cytidylyltransferase A	331		1	-0.479292	-0.828576	0.564679	0.0268551	0.115599	0.256991	-0.494772	0.475864	0.291883	-0.0899979
Pcyt1a	Choline-phosphate cytidylyltransferase A	347		0.967294	-0.682692	-0.486005	-0.670758	-0.155672	-0.0229176	-0.0431579	0.562929	0.285594	1.10895	-0.050453
Hcls1	Hematopoietic lineage cell-specific protein	333		0.305706	0.228468	0.347501	0.473334	0.202942	0.375533	0.560271	-1.94038	0.158678	-0.833738	0.241392
Hcls1	Hematopoietic lineage cell-specific protein	62		1	-0.479482	-0.0385218	0.0094036	-0.0474096	-0.071021	0.498721	0.268558	0.398818	-0.296219	-0.200743
Hcls1	Hematopoietic lineage cell-specific protein	232		0.857875	0.204973	-0.122588	-0.879941	-0.147607	1.57641	0.278313	-0.305114	0.0488205	0.0196877	-0.60576
Hcls1	Hematopoietic lineage cell-specific protein	233		0.94795	-0.0735563	-0.280537	-1.23279	-0.380075	1.27262	0.237879	-0.221011	0.0788734	0.446512	0.0366523
Mcm4	DNA replication licensing factor MCM4	130		1	-0.831599	0.305526	-0.44802	-0.0130126	-0.0586794	-0.102729	0.314842	0.32189	0.437225	0.102974
Mcm4	DNA replication licensing factor MCM4	3		1	-0.297326	-0.187443	-0.217311	0.938395	0.508374	-0.727583	0.0210827	-0.0187748	-0.508499	0.520262
Mcm5	DNA replication licensing factor MCM5	314		1	-0.23738	-0.633596	0.441992	0.524257	-0.42854	0.529704	0.21065	-0.0180185	0.161429	-0.652869
Psen1	Presenilin-1;Presenilin-1 NTF subunit;Presenilin-1 CTF subunit;Presenilin-1 CTF12	367		1	0.494014	-0.132844	0.0633532	-0.0473009	0.136824	-0.239131	-0.356482	-0.586148	0.102647	0.49278
Psen1	Presenilin-1;Presenilin-1 NTF subunit;Presenilin-1 CTF subunit;Presenilin-1 CTF12	371		0.903149	-1.47573	0.161426	0.167015	-0.228468	-0.141918	0.366819	0.230966	0.403991	0.353891	0.266377
Psen1	Presenilin-1;Presenilin-1 NTF subunit;Presenilin-1 CTF subunit;Presenilin-1 CTF12	59		1	0.0937868	-0.470843	0.485632	0.265018	-0.0572125	-0.681781	0.407006	-0.500366	-0.251749	0.801655
Bckdha	2-oxoisovalerate dehydrogenase subunit alpha, mitochondrial	334		1	0.342095	-0.607477	-0.943999	0.339051	-0.24843	0.305692	-0.386379	0.767243	0.0526602	-0.167028
Pa2g4	Proliferation-associated protein 2G4	2		0.900068	-0.0155024	-1.66381	0.30808	-0.0587117	0.380928	0.149774	0.0250566	-0.0825339	0.676832	0.0424521
Cast	Calpastatin	163		0.361862	0.421531	0.376979	-0.882914	1.01882	-0.17686	-0.475935	-0.871616	-0.754472	-0.00301594	0.958886
Cast	Calpastatin	165		1	0.717241	0.139703	-0.217985	-0.251118	-0.698741	-0.334461	0.295051	0.266803	0.0608234	-0.0978096
Cast	Calpastatin	655		0.843598	0.532625	0.660906	0.633237	-1.0761	0.01585	-0.121619	-0.227231	-0.137537	-0.506066	0.496626
Cast	Calpastatin	605		0.068339	-0.24526	-0.973739	-0.544722	-0.300632	0.155538	-0.455693	1.61392	0.53434	1.07002	-0.791019
Cast	Calpastatin	377		1	0.277693	0.318991	0.217007	-0.938417	0.869276	-0.164225	0.171056	-0.291032	-0.0715434	0.00527705
Cast	Calpastatin	303		1	-0.27578	-0.192911	0.422928	0.309245	0.692742	-0.309719	0.285732	0.231371	0.150724	-1.01221
Cast	Calpastatin	11		1	-0.521879	-0.872063	0.491121	-0.569218	0.529919	-0.0585297	0.213137	0.275105	0.36134	0.241596
Cast	Calpastatin	219		0.0789283	-0.839509	-1.0126	-0.218666	-0.753867	-0.270593	-0.307659	1.92415	0.946064	0.531642	0.106603
Cast	Calpastatin	442		0.417327	-0.43011	0.00706154	-0.140202	-0.695239	-0.264945	-0.280291	1.7336	-0.350268	0.926919	-0.172649
Cast	Calpastatin	444		1	0.250638	0.30593	0.163521	-0.300449	-0.468112	-0.277533	0.0371933	0.142611	0.599331	-0.443497
Cast	Calpastatin	453		0.992202	0.0537276	-1.01183	0.37757	0.365902	0.738846	0.549508	-0.0167348	-0.082383	-0.168727	-0.783918
Cast	Calpastatin	81		1	-0.260447	0.445721	-0.212379	0.414814	-0.394932	-0.147569	0.689839	0.200913	-0.255056	-0.348842
Dvl1	Segment polarity protein dishevelled homolog DVL-1	194		1	-0.410522	0.394242	0.552376	0.429652	0.51769	-0.0660892	-0.212754	-0.277576	-0.0255636	-0.588567
Rab7a	Ras-related protein Rab-7a	72		0.907963	0.025154	0.205422	0.138219	0.129935	1.07995	0.878116	-0.215817	-0.425859	-0.841867	-0.671311
Plcb3	1-phosphatidylinositol 4,5-bisphosphate phosphodiesterase beta-3	1105		1	-0.339577	-0.308366	-0.877551	0.188967	0.889095	0.757744	0.0550256	0.295851	-0.298538	-0.4231
Plcb3	1-phosphatidylinositol 4,5-bisphosphate phosphodiesterase beta-3	537		1	-0.270788	-0.74551	-0.0762028	0.58726	1.29121	-0.278879	0.128142	-0.544973	-0.126589	0.185742
Xpc	DNA repair protein complementing XP-C cells homolog	93		1	-0.455081	-0.303802	-0.00430218	0.150276	0.812847	0.546756	0.436165	0.270735	0.0251652	-1.24353
Xpc	DNA repair protein complementing XP-C cells homolog	369		1	-0.138681	-0.296405	0.604042	0.208263	-0.0572681	0.927206	0.0849338	-0.186962	-0.362919	-0.698384
Ccr5	C-C chemokine receptor type 5	351		1	0.499066	0.00882483	0.662866	-0.0993398	-0.313365	0.142155	-0.753142	0.422856	-0.53368	-0.134944
Adcy7	Adenylate cyclase type 7	510		0.983576	-0.871245	0.191135	0.372318	-0.00535025	-0.64574	-0.0480228	0.486804	-0.518135	0.985065	0.1543
Adcy9	Adenylate cyclase type 9	613		0.826807	-0.246622	0.336816	-0.0670762	0.330386	0.423733	0.599673	0.731202	0.107884	-0.834596	-1.02523
Hdgf	Hepatoma-derived growth factor	165		1	-0.640232	0.198971	0.474947	-0.148388	0.161329	0.182396	-0.54367	0.608014	0.20904	-0.429513
Hdgf	Hepatoma-derived growth factor	236		0.903431	-1.17455	0.328508	0.297857	-0.0871636	0.889838	0.10106	0.440918	0.203745	0.186761	-0.697695
Hdgf	Hepatoma-derived growth factor	132		1	-0.0110436	0.244366	0.0960169	0.0432271	0.950439	-0.889447	-0.128585	-0.0949298	0.119057	-0.0385402
Hdgf	Hepatoma-derived growth factor	133		1	0.0741515	0.0875707	-0.379104	0.0764001	0.996407	-0.0734851	-0.267152	-0.00481502	-0.536178	0.135635
Hdgf	Hepatoma-derived growth factor	202		1	0.0561475	0.294059	0.108578	-0.113337	0.471646	0.706721	0.172354	-0.0595497	-0.447555	-0.927405
Atp6v0d1	V-type proton ATPase subunit d 1	283		0.959854	0.816268	-0.335621	-0.138317	0.156193	-0.466069	0.177364	0.363026	0.00400497	0.389807	-1.1109
Slc1a5	Neutral amino acid transporter B(0)	506		1	0.0212033	-0.462546	0.0989812	0.372112	-0.159015	-0.807731	0.0728254	-0.00920327	0.245641	0.515293
Slc1a5	Neutral amino acid transporter B(0)	518		1	0.54008	-0.342673	-0.322563	0.271169	0.647266	-0.242156	-0.685727	0.27759	0.255066	-0.573977
Nek1	Serine/threonine-protein kinase Nek1	1071		0.95081	-0.16009	0.243549	0.165803	-0.156043	0.572052	0.419901	0.163633	0.604287	-1.28193	-0.284906
Kpna2	Importin subunit alpha-1	62		1	-0.293531	0.527998	0.0543181	-0.615407	0.0622015	0.341019	0.101682	-0.196422	0.248706	-0.0440149
Pkm	Pyruvate kinase PKM	100		1	-0.237245	-0.189942	0.14865	-0.626401	-0.300333	0.72182	-0.153332	0.755442	0.336151	-0.57855
Pkm	Pyruvate kinase PKM	127		1	-0.38578	-0.423475	0.318917	0.121924	0.179694	0.259391	0.799881	-0.359133	0.104149	-0.396813
Ube2e3	Ubiquitin-conjugating enzyme E2 E3	12		1	-0.0127886	0.449446	-0.0585198	0.416433	-0.235125	0.286263	-0.398212	0.604772	-0.770424	-0.342448
Hmga2	High mobility group protein HMGI-C	100		0.7601	0.322453	0.31518	0.428517	-1.32456	0.160436	0.323755	-0.564572	0.469099	-0.33523	0.289817
Hmga2	High mobility group protein HMGI-C	104		1	-0.556264	-0.151479	0.643606	-0.636743	-0.950567	0.342421	0.518429	0.527414	0.302	-0.0238198
Hmga2	High mobility group protein HMGI-C	2		0.971979	-0.79211	-0.686761	-0.15569	0.564207	0.521994	0.865622	-0.420684	0.153847	-0.279835	0.0441251
Map3k1	Mitogen-activated protein kinase kinase kinase 1	517		1	-0.0254661	0.0175151	0.550685	-0.527896	0.347555	0.595039	0.00972398	0.466715	-0.663217	-0.539285
Map3k1	Mitogen-activated protein kinase kinase kinase 1	518		0.46296	-0.352584	-0.98918	-0.0664439	-0.510337	-0.527267	0.033933	1.76849	0.796428	0.1531	-0.259742
Map3k1	Mitogen-activated protein kinase kinase kinase 1	142		1	-0.612179	-0.218886	0.295217	-0.119336	0.0812493	0.278681	0.612116	-0.131234	0.496587	-0.489791
Map3k1	Mitogen-activated protein kinase kinase kinase 1	999		1	-0.31467	0.665218	0.47632	-0.0107699	-0.611931	-0.131164	0.00486073	0.0696685	-0.0713281	0.0574132
Map3k1	Mitogen-activated protein kinase kinase kinase 1	915		1	-0.7555	0.0697391	0.364595	-0.400339	0.287772	-0.432809	0.274796	0.408604	0.330698	0.10167
Map3k1	Mitogen-activated protein kinase kinase kinase 1	261		0.996011	-0.763908	0.239901	0.48137	0.10538	0.640375	0.0527979	-0.116018	0.541206	0.144958	-1.01465
Dbt	Lipoamide acyltransferase component of branched-chain alpha-keto acid dehydrogenase complex, mitochondrial	189		0.669469	-0.85948	-1.43409	0.914054	-0.015987	0.372515	0.485697	0.755545	-0.0646742	0.312285	-0.313857
Cux1	Homeobox protein cut-like 1	1316		0.987776	0.811722	0.802396	-0.138354	0.107381	-0.192576	0.0641624	0.130247	-0.0473299	-0.827429	-0.559792
Cux1	Homeobox protein cut-like 1	1467		0.983774	0.579169	-0.0443556	-0.0882064	-1.06648	0.423211	-0.00376654	0.776347	0.200914	0.112952	-0.623033
Arnt	Aryl hydrocarbon receptor nuclear translocator	77		1	0.155576	-0.781245	-0.278631	0.466456	0.337384	-0.465636	0.471668	-0.233598	-0.218891	0.484212
Slc16a1	Monocarboxylate transporter 1	477		0.393053	0.0658462	-0.268344	-1.65096	0.21879	-0.166257	0.304025	0.186187	0.287799	-0.579798	1.12787
Slc16a1	Monocarboxylate transporter 1	491		1	-0.692242	-0.0336105	-0.167434	0.497486	-0.764604	0.457363	0.285847	0.477126	0.365733	-0.595616
Slc16a1	Monocarboxylate transporter 1	461		1	0.464064	0.106867	-0.303886	0.416916	0.287638	0.361175	-0.399017	-0.386104	-0.152766	-0.471986
Slc16a1	Monocarboxylate transporter 1	213		0.973796	0.146466	0.075007	0.190601	0.240088	-0.866668	0.329423	-1.3438	0.448224	0.159917	0.134524
Anapc1	Anaphase-promoting complex subunit 1	688		0.935842	-0.347459	-0.289607	-0.1659	-0.077894	-0.753127	-0.337265	1.19938	-0.302455	0.854809	0.217205
Anapc1	Anaphase-promoting complex subunit 1	901		0.644855	0.409539	-0.59672	0.853806	-0.266664	0.69417	0.832678	0.184877	-0.874178	-0.384751	-0.568723
Dnajc2	DnaJ homolog subfamily C member 2	183		1	0.0378918	0.0862343	0.14218	0.487957	-0.403827	-0.125575	-0.109467	-0.0632538	-0.617549	0.494189
Dnajc2	DnaJ homolog subfamily C member 2	47		1	-0.184134	-0.0600761	0.316611	0.142347	0.554405	-0.595044	0.619621	-0.711934	0.326489	-0.0506442
Dnajc2	DnaJ homolog subfamily C member 2	49		0.814584	-0.151862	0.0744671	1.01901	0.750935	-0.00598333	-0.706146	-0.372562	-0.802801	0.504882	-0.131208
Stom	Erythrocyte band 7 integral membrane protein	161		1	0.108173	-0.129522	0.73697	-0.170739	0.458498	0.34322	0.478716	-0.406347	-0.369349	-0.663455
Stmn1	Stathmin	16		0.975731	-0.81699	-0.454581	-0.547035	-0.407403	0.166119	-0.193193	-0.128732	0.435785	0.906384	0.798588
Stmn1	Stathmin	25		0.826898	-0.668294	0.154658	0.206577	-0.663376	-0.888859	0.150528	1.16067	0.14048	0.358609	0.207272
Stmn1;Stmn2	Stathmin;Stathmin-2	46;80		0.815908	-0.46405	-0.447675	-0.398957	-0.730501	-0.363691	0.215836	1.47281	0.680957	0.504506	-0.403614
Stmn1	Stathmin	38		0.389816	-0.895819	-0.458898	-0.579824	-0.391875	-0.580401	-0.384075	0.941492	0.854617	0.916068	0.409308
Stmn1	Stathmin	63		1	-0.347092	0.207846	0.0454044	0.253359	-0.160955	0.00933703	0.312318	-0.271695	0.161397	-0.108766
Atxn1	Ataxin-1	213		0.769651	-0.316379	0.134395	1.2132	-0.472178	-0.0163407	0.818473	0.475679	-0.209251	-0.458027	-0.717838
Atxn1	Ataxin-1	382		1	0.321112	0.386459	0.534689	-0.849226	0.435502	-0.10697	0.522731	-0.241704	-0.282671	-0.250078
Msh6	DNA mismatch repair protein Msh6	252		1	0.231407	0.325236	0.0544167	-0.111815	-0.515523	0.0712945	-0.283964	0.471565	0.582546	-0.930122
Msh6	DNA mismatch repair protein Msh6	63		1	-0.227685	0.363471	0.29576	-0.0916804	-0.206704	0.453489	-0.356656	0.00461264	-0.00383051	-0.206808
Msh6	DNA mismatch repair protein Msh6	137		1	-0.289055	0.277791	0.135348	-0.647193	-0.292303	0.16609	0.189131	0.324305	0.155642	0.0577349
Lipe	Hormone-sensitive lipase	559		0.746245	0.0145001	-1.39651	0.256074	0.0344537	0.388571	0.439868	0.282253	0.550389	0.298437	-0.98544
Faf1	FAS-associated factor 1	581		1	-0.414526	-0.251297	0.330306	-0.0855587	0.137309	-0.0143919	0.0558229	-0.284294	0.313267	0.281397
Faf1	FAS-associated factor 1	319		1	0.187421	0.385744	-0.0154886	-0.571713	0.564349	0.144241	-0.920819	-0.101341	0.185681	0.145372
Psmc4	26S protease regulatory subunit 6B	28		0.49446	-0.111205	-0.390307	-0.463449	0.0470369	-0.344345	-0.38759	1.09379	1.44565	-0.325407	-0.590254
Slc12a2	Solute carrier family 12 member 2	74		1	0.0438451	-0.81788	0.2472	-0.0476603	0.441673	0.400321	-0.380504	0.269491	0.424589	-0.708453
Sh3bp1	SH3 domain-binding protein 1	182		0.832539	-0.722325	-0.694465	0.138401	-0.778239	0.244908	0.113096	0.982739	0.246067	0.0609294	0.576783
Sh3bp1	SH3 domain-binding protein 1	456		0.996617	-0.146617	-0.129705	0.261016	-1.29534	0.187598	0.0790003	0.233532	0.471769	0.357559	0.119299
Sh3bp1	SH3 domain-binding protein 1	553		1	-0.332209	-0.434768	0.659252	-0.460734	0.00246943	-0.100013	0.882282	-0.172438	0.125014	0.108454
Sh3bp1	SH3 domain-binding protein 1	497		1	-0.24634	0.571103	-0.0335021	0.98646	0.207707	-0.48862	-0.652882	0.0660057	-0.268501	-0.118323
Sh3bp1	SH3 domain-binding protein 1	498		0.970878	-0.384856	0.646467	-0.339937	1.08054	0.0931426	-0.798417	-0.260214	-0.258267	0.0864574	0.169951
Sh3bp1	SH3 domain-binding protein 1	510		0.995907	-0.586953	-0.528823	0.563197	-0.555349	0.781706	0.0611982	0.541254	0.465296	-0.134573	-0.26762
Kmt2a;Ireb2	Histone-lysine N-methyltransferase 2A;MLL cleavage product N320;MLL cleavage product C180;Iron-responsive element-binding protein 2	277;158		1	-0.337992	-0.349312	-0.12966	-0.25008	0.310956	0.00310696	-0.313184	0.719007	0.766389	-0.539531
Kmt2a	Histone-lysine N-methyltransferase 2A;MLL cleavage product N320;MLL cleavage product C180	151		1	-0.0604719	0.493541	-0.462907	-0.525247	0.598631	-0.319072	0.157301	0.515141	0.338205	-0.53848
Kmt2a	Histone-lysine N-methyltransferase 2A;MLL cleavage product N320;MLL cleavage product C180	1839		1	-0.490026	-0.389565	0.0661112	-0.638234	-0.196881	0.207808	0.313828	0.685868	-0.179911	0.569376
Kmt2a	Histone-lysine N-methyltransferase 2A;MLL cleavage product N320;MLL cleavage product C180	3032		0.800202	-1.09615	0.00949247	0.0911598	0.092674	0.162069	0.308318	1.57335	-0.39479	-0.253718	-0.0333904
Kmt2a	Histone-lysine N-methyltransferase 2A;MLL cleavage product N320;MLL cleavage product C180	181		0.0924196	-0.709434	-1.58154	-0.102753	-0.28482	0.206196	-0.795423	0.475732	0.671121	0.833752	1.03658
Kmt2a	Histone-lysine N-methyltransferase 2A;MLL cleavage product N320;MLL cleavage product C180	1860		0.570362	0.41242	0.514186	0.369898	-0.00908838	0.37693	0.349485	-2.01366	0.204857	-0.413988	0.0207966
Rab8a	Ras-related protein Rab-8A	181		0.719547	-0.0104557	0.125153	-0.559376	0.42758	0.126174	0.341199	0.625668	0.457697	-0.00963984	-1.44459
Rab8a	Ras-related protein Rab-8A	185		1	0.485028	0.319244	0.791753	-0.208999	-0.0438038	-0.066291	-0.0638856	-0.552141	-0.0608984	-0.349179
Lrpap1	Alpha-2-macroglobulin receptor-associated protein	138		1	-0.33794	-0.110951	-0.221235	-0.235972	-0.0113321	0.205935	-0.243101	0.210977	0.567934	0.0290298
Lrpap1	Alpha-2-macroglobulin receptor-associated protein	53		1	0.199709	-0.906172	-0.786346	-0.524735	0.188223	0.227691	0.296249	0.383756	0.360189	0.259426
Golga3	Golgin subfamily A member 3	1479		1	-0.496227	0.796326	0.828242	-0.361849	0.0718721	-0.303811	0.0609126	0.0873919	0.242322	-0.485843
Rrp1	Ribosomal RNA processing protein 1 homolog A	434		1	-0.89689	-0.101725	-0.391951	0.325062	-0.150591	-0.221335	0.507039	0.334272	1.01595	-0.454137
Arpp19	cAMP-regulated phosphoprotein 19	104		0.716134	-0.972701	-0.639179	-0.709172	-0.448187	0.313079	0.670806	-0.316438	0.528633	0.632063	0.603168
Arpp19;Ensa	cAMP-regulated phosphoprotein 19;Alpha-endosulfine	62;67		0.745957	0.145084	0.278928	0.34445	0.165828	1.0007	0.487105	-0.540869	0.164789	-0.526386	-1.24883
Wfs1	Wolframin	32		1	-0.613542	0.353217	-0.0200609	-0.21164	-0.518858	0.277065	0.846379	0.517533	0.227709	-0.692632
Pdcd5	Programmed cell death protein 5	119		1	0.319619	-0.883111	0.472684	-0.353144	0.269714	0.286609	-0.554507	0.533229	-0.322889	0.0579898
Fus	RNA-binding protein FUS	270		0.411488	-0.869941	-0.45102	-0.595694	-0.226696	-0.382042	-0.534746	0.181182	0.418546	1.04403	1.10448
Usp25	Ubiquitin carboxyl-terminal hydrolase 25	113		1	-0.132689	-0.376852	-0.56336	-0.288238	1.28838	0.435665	-0.617027	0.33103	0.110337	-0.254459
Samsn1	SAM domain-containing protein SAMSN-1	22		1	-0.499872	-0.111688	0.314978	-0.155858	0.461446	0.485411	-0.42812	0.0363389	0.352504	-0.395987
Samsn1	SAM domain-containing protein SAMSN-1	23		1	-0.458882	-0.51212	0.0334743	0.12246	0.769699	0.246039	-0.947185	0.0514536	0.118991	0.412037
Npy	Pro-neuropeptide Y;Neuropeptide Y;C-flanking peptide of NPY	82		1	-0.0697723	0.358559	0.113117	-0.0876236	0.184934	-0.251405	-0.515906	0.1228	-0.0912158	0.271689
Eef1d	Elongation factor 1-delta	133		1	0.0398466	0.439627	0.0236435	0.105322	-0.10291	-0.0223201	-0.0653909	-0.198904	-0.229445	0.0842735
Eef1d	Elongation factor 1-delta	162		1	-0.0910616	-0.614562	0.17122	-0.351914	0.426701	0.145235	1.01881	-0.0177981	-0.0311546	-0.404932
Slc16a3	Monocarboxylate transporter 4	430		0.899946	0.14714	-0.0967177	-0.919055	0.193488	0.236974	-0.458046	-1.1888	0.446263	0.729314	0.417543
Slc16a3	Monocarboxylate transporter 4	469		0.849769	-0.912103	-0.225781	-0.421594	0.16434	0.832548	0.165013	0.497445	0.168612	0.676897	-0.774723
Nadk	NAD kinase	46		0.801607	-0.805299	-0.974138	-0.844306	-0.166154	0.357198	0.474783	0.947171	0.348319	0.178182	0.355725
Nadk	NAD kinase	48		1	-0.0472886	0.16661	-0.0894472	-0.633469	-0.0751153	0.478982	-0.133009	0.219029	0.232971	-0.152003
Uchl3;Uchl4	Ubiquitin carboxyl-terminal hydrolase isozyme L3;Ubiquitin carboxyl-terminal hydrolase isozyme L4	130;133		0.635346	0.0106168	0.527408	0.318704	0.244144	0.699381	-0.241445	0.220158	0.0222641	0.236043	-1.59586
Uchl3;Uchl4	Ubiquitin carboxyl-terminal hydrolase isozyme L3;Ubiquitin carboxyl-terminal hydrolase isozyme L4	161;164		0.288314	-1.30913	-0.416362	0.319783	-0.576885	-0.121171	-0.112541	1.51649	0.259952	0.740931	0.0236155
Klf16	Krueppel-like factor 16	113		1	-0.448237	-0.22534	-0.178026	0.255411	0.216279	0.426713	-0.80817	0.0169222	0.097116	0.398518
Strn4	Striatin-4	223		1	-0.0432339	-0.056673	0.0792026	-1.04075	0.268507	-0.0705177	0.680332	-0.048472	0.378689	0.0957597
Fam207a	Protein FAM207A	38		0.725185	-0.333175	-1.28132	0.0757639	-0.239691	-0.166897	0.499001	1.50122	0.198598	0.22364	-0.444945
Paxbp1	PAX3- and PAX7-binding protein 1	297		1	0.245139	0.318262	0.471998	-0.449323	-0.810069	-0.381641	0.402974	0.319849	-0.252343	0.230945
Paxbp1	PAX3- and PAX7-binding protein 1	264		1	-0.253562	0.401837	0.667787	0.346504	-0.575044	0.00939327	0.930342	-0.127062	-0.422798	-0.621166
Ripk2	Receptor-interacting serine/threonine-protein kinase 2	356		0.615445	0.503486	-0.571726	-0.947897	-0.413011	0.819227	0.513639	0.447565	-0.0267277	0.508531	-0.896294
Ripk2	Receptor-interacting serine/threonine-protein kinase 2	364		1	-0.0820703	-0.146558	0.139445	-0.787812	0.298541	-0.0545116	-0.829534	0.426077	0.475318	0.426579
Tbc1d10a	TBC1 domain family member 10A	407		1	0.179524	-0.326313	0.186626	-0.252308	0.292061	0.173003	0.248182	0.201308	0.253087	-0.855031
Tbc1d10a	TBC1 domain family member 10A	409		1	-0.819212	0.413652	-0.478658	0.0168125	0.712171	0.0481872	-0.543007	0.396127	0.55345	-0.273484
Tbc1d10a	TBC1 domain family member 10A	18		0.819752	0.457041	-0.746132	0.224667	0.489859	0.539029	0.515075	-0.601853	0.353695	-1.02663	-0.350818
Tubgcp3	Gamma-tubulin complex component 3	513		1	-0.271172	-0.416931	0.521687	-0.181337	-0.138882	0.206339	0.153086	0.465366	0.0416103	-0.350027
Tnks1bp1	182 kDa tankyrase-1-binding protein	1022		0.645544	-0.54158	-0.28876	-0.458919	-0.333421	-0.0129153	-0.749708	1.32919	0.907301	0.340587	-0.0496288
Tnks1bp1	182 kDa tankyrase-1-binding protein	911		0.972183	0.0143543	0.466046	1.03237	0.274149	0.011615	0.357619	-0.34323	0.100856	-0.783262	-0.838818
Tnks1bp1	182 kDa tankyrase-1-binding protein	1063		1	-0.276107	-0.00694621	-0.47233	0.14713	0.225711	0.118685	1.07686	-0.497217	-0.233194	0.123236
Tnks1bp1	182 kDa tankyrase-1-binding protein	1657		0.125036	-1.19949	-0.351796	0.190852	0.112081	-1.36771	-0.49644	0.649789	0.79353	0.862549	0.586918
Tnks1bp1	182 kDa tankyrase-1-binding protein	429		0.531646	-0.261953	0.195698	-1.13477	-0.790493	0.431534	-0.718218	0.517075	0.361488	0.916346	0.485678
Tnks1bp1	182 kDa tankyrase-1-binding protein	1375		0.621714	-0.335281	-0.497049	-1.20903	-0.634847	0.0753786	0.210393	1.3751	0.198412	0.353249	0.39978
Tnks1bp1	182 kDa tankyrase-1-binding protein	1131		1	-0.492029	-0.576534	-0.810164	0.0239701	0.0450356	-0.232455	0.719656	0.826926	0.0237562	0.316337
Bcl2l13	Bcl-2-like protein 13	300		0.932046	-0.237386	0.413529	-1.07979	-0.105186	-0.467432	0.764915	0.225863	0.444608	0.386696	-0.572771
Bcl2l13	Bcl-2-like protein 13	302		1	-0.373923	0.761038	0.25958	0.229633	0.738994	-0.224998	-0.325139	-0.396848	-0.0667274	-0.242992
Bcl2l13	Bcl-2-like protein 13	387		0.438265	0.278868	0.252145	0.422799	-0.413559	-1.79853	-0.44952	0.544819	0.428571	0.364726	0.224987
Bcl2l13	Bcl-2-like protein 13	285		0.889922	0.141509	-0.672261	-0.100395	-0.0951797	-0.293714	-0.335763	1.41754	0.571858	0.0487373	-0.594537
Bcl2l13	Bcl-2-like protein 13	343		1	-0.0504748	0.251984	0.403308	0.550816	0.247904	0.00843081	-0.186469	-0.290495	-0.302651	-0.453171
Senp1	Sentrin-specific protease 1	412		0.708773	0.848565	0.723275	0.453749	-0.0789228	0.394026	0.102579	-0.991256	-1.09421	0.116764	-0.329623
Pcif1	Phosphorylated CTD-interacting factor 1	8		1	-0.277196	0.389641	-0.115328	-0.658435	-0.459832	0.551909	-0.104009	-0.0542246	0.0987599	0.556333
Pcif1	Phosphorylated CTD-interacting factor 1	144		1	-0.629086	0.792272	-0.263467	-0.0820348	-0.449648	0.318347	0.170512	0.0177663	0.436682	-0.248926
Pcif1	Phosphorylated CTD-interacting factor 1	116		0.227847	-1.087	-1.07467	-1.1001	0.0684184	-0.0402237	0.16715	0.279464	0.395547	1.06171	0.845828
L3mbtl2	Lethal(3)malignant brain tumor-like protein 2	687		1	-0.343419	-0.194991	-0.27259	0.0665623	0.54165	0.379069	-0.244082	0.399541	0.0151649	-0.389408
Nphp4	Nephrocystin-4	145		1	-0.97145	-0.493378	-0.119173	-0.342602	0.250679	0.322529	-0.0237604	0.292045	0.354638	0.634065
Arhgap39	Rho GTPase-activating protein 39	597		1	-0.366776	0.00805224	-0.5157	0.0491759	0.676838	0.583776	-0.249629	0.181109	0.32539	-0.712347
Eif5	Eukaryotic translation initiation factor 5	227		1	-0.159699	-1.20892	0.215577	0.111268	0.226163	-0.192859	1.10258	0.264675	-0.0873913	-0.187547
Eif5	Eukaryotic translation initiation factor 5	417		1	-0.223324	-0.554537	0.494741	-0.211526	0.35505	0.379417	0.519023	-0.00102682	-0.152598	-0.401651
Wdhd1	WD repeat and HMG-box DNA-binding protein 1	821		1	-0.166852	0.0592019	-0.22195	0.116138	-0.167841	0.119777	-0.136726	0.31708	0.17264	-0.208297
Wdhd1	WD repeat and HMG-box DNA-binding protein 1	377		1	-0.0717866	-0.0190523	-0.423237	-0.104721	0.414474	0.497227	-0.56684	0.232177	-0.164339	0.0574353
Hps5	Hermansky-Pudlak syndrome 5 protein homolog	662		0.83332	-0.612135	-0.21719	-0.510024	-0.582135	-0.658314	0.10635	0.624403	0.704293	0.12651	0.82796
Hps5	Hermansky-Pudlak syndrome 5 protein homolog	563		1	-0.477083	-0.946804	0.607746	-0.591007	0.414428	0.288202	-0.282979	0.296641	0.723232	-0.0842781
Hps5	Hermansky-Pudlak syndrome 5 protein homolog	534		0.982448	-0.528621	-0.807621	0.651017	0.347761	0.119408	0.297522	0.575848	-0.84663	0.567219	-0.241239
Anks1a	Ankyrin repeat and SAM domain-containing protein 1A	903		0.817725	-0.647423	-0.491304	0.045596	0.192362	-0.566878	-0.822885	0.382755	0.439921	0.927326	0.383072
Anks1a	Ankyrin repeat and SAM domain-containing protein 1A	693		0.971421	0.830428	-0.361427	0.677077	0.161867	-0.550705	0.108893	-0.679274	0.431461	-0.625368	-0.221535
Anks1a	Ankyrin repeat and SAM domain-containing protein 1A	461		1	-0.408871	-0.628868	-0.111402	0.0226441	0.462891	0.505015	0.371656	-0.297856	-9.89139e-05	0.108459
Rin3	Ras and Rab interactor 3	411		1	-0.190875	0.344683	-0.648926	-0.113475	0.237599	0.494549	-0.275416	0.435101	-0.0869299	-0.281825
Mkl2	MKL/myocardin-like protein 2	839		1	-0.357929	-0.334538	0.153864	-0.482576	0.0605644	-0.173717	0.630722	-0.319801	0.32668	0.624384
Mkl2	MKL/myocardin-like protein 2	66		1	-0.212542	-0.00197782	0.0645821	0.32123	-0.265022	0.461399	0.335852	-0.169385	0.0200657	-0.520842
Mkl2	MKL/myocardin-like protein 2	209		0.991252	-0.72986	-0.258131	-0.237041	-0.638067	0.417505	-0.0393025	0.817094	0.634941	0.0836662	0.134052
Mkl2	MKL/myocardin-like protein 2	537		0.744431	-0.175649	-0.834596	-0.552352	-0.988703	0.145788	-0.0925921	0.6835	0.788696	0.525296	0.361196
Dock4	Dedicator of cytokinesis protein 4	1629		1	-0.0867499	-0.151764	0.233823	-0.246766	-0.636036	0.201426	-0.139633	0.0190823	0.0629186	0.570296
Sash1	SAM and SH3 domain-containing protein 1	500		1	-0.603936	-0.674697	0.14435	-0.132166	0.228437	0.0698837	-0.273309	0.398448	0.439165	0.260019
Sash1	SAM and SH3 domain-containing protein 1	692		1	0.0210619	0.0509843	0.268128	0.223595	0.388382	-1.04488	0.39813	0.000949889	-0.413885	0.383944
Sash1	SAM and SH3 domain-containing protein 1	694		1	-0.0945058	0.18791	0.463373	-0.697984	0.467561	-0.423174	-0.502459	0.264723	0.242717	0.245935
Sash1	SAM and SH3 domain-containing protein 1	699		0.745284	-0.5835	0.613519	0.613336	-0.0364781	-1.48392	0.293341	-0.535348	0.191708	0.505488	0.223749
Sash1	SAM and SH3 domain-containing protein 1	241		1	-0.269015	0.227128	0.508908	-0.271513	0.399184	-0.0588523	0.2193	0.1112	-0.285637	-0.242074
[truncated: 11,132 more rows]
